# Supplementary material for: Extreme weather exposure identification for road networks – a comparative assessment of statistical methods
Source: Copernicus journal article supplement (doi:10.5194/nhess-2016-373), 2016-12-05

Bischofshofen  
Weibull (1939)

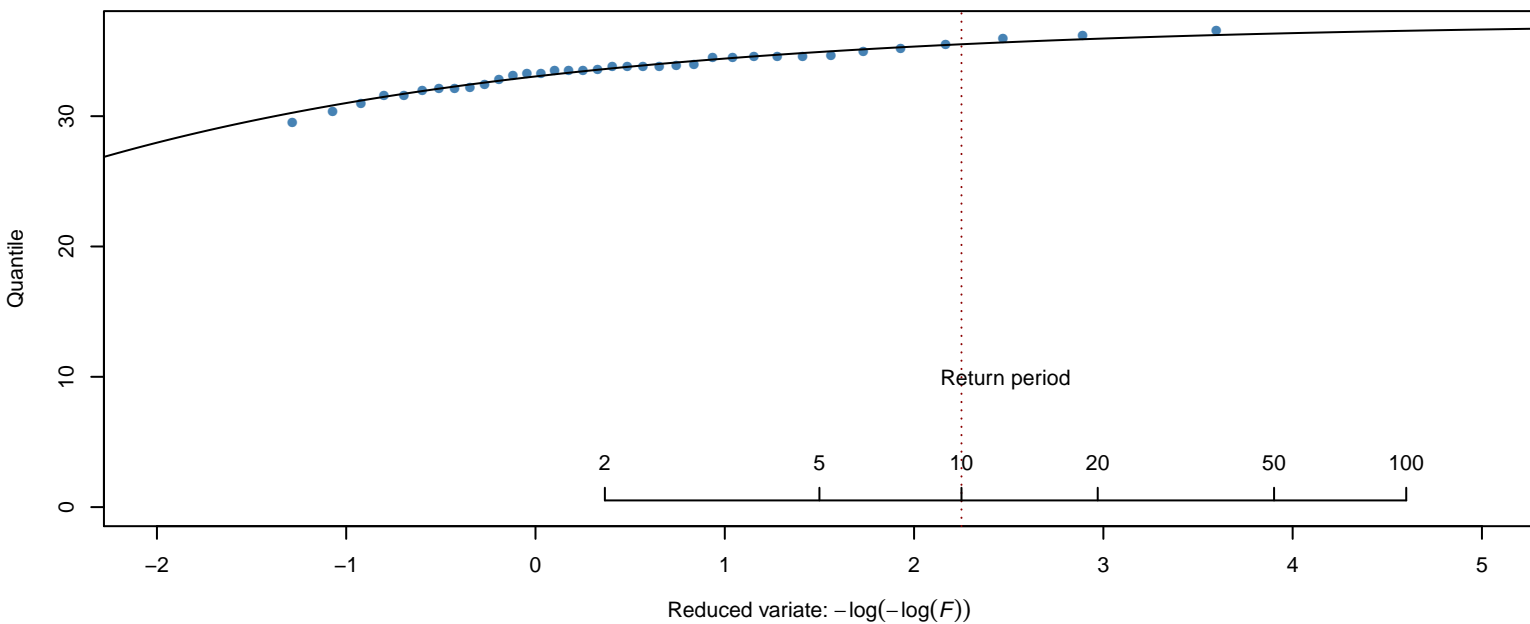

Beard (1943)

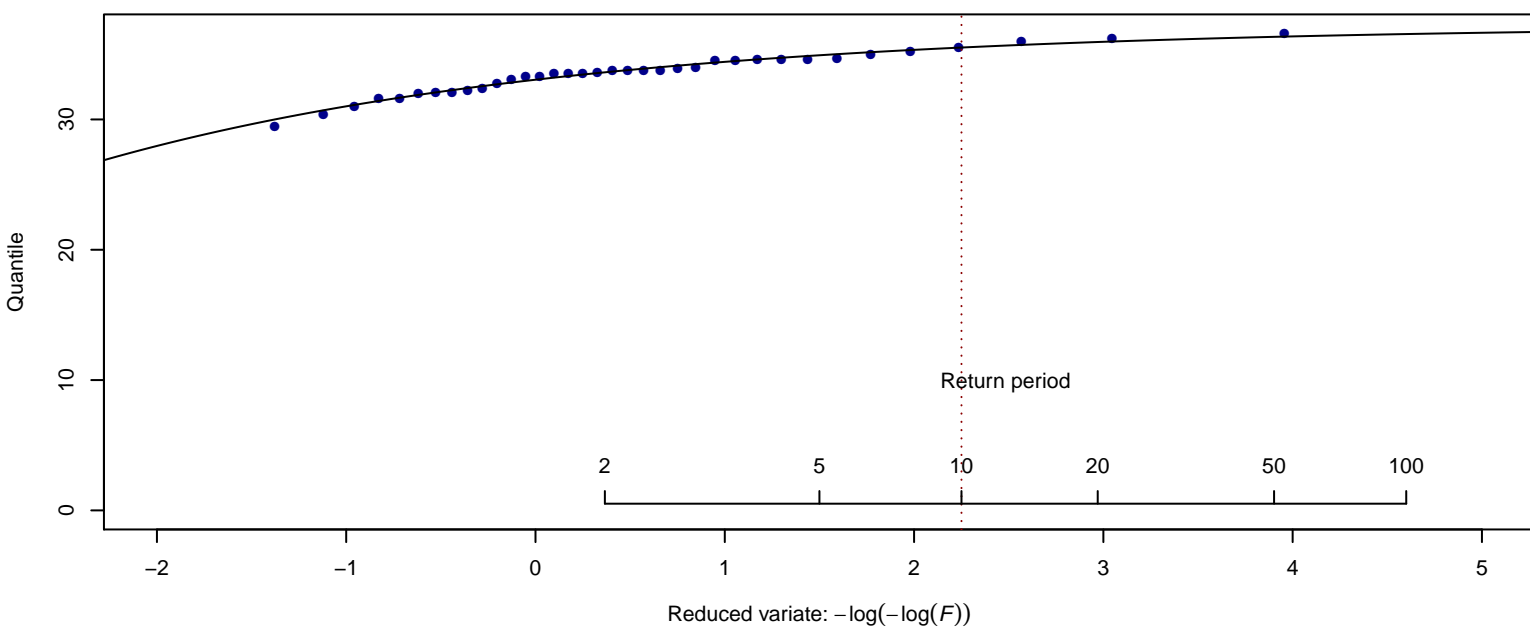

Gringorten (1963)

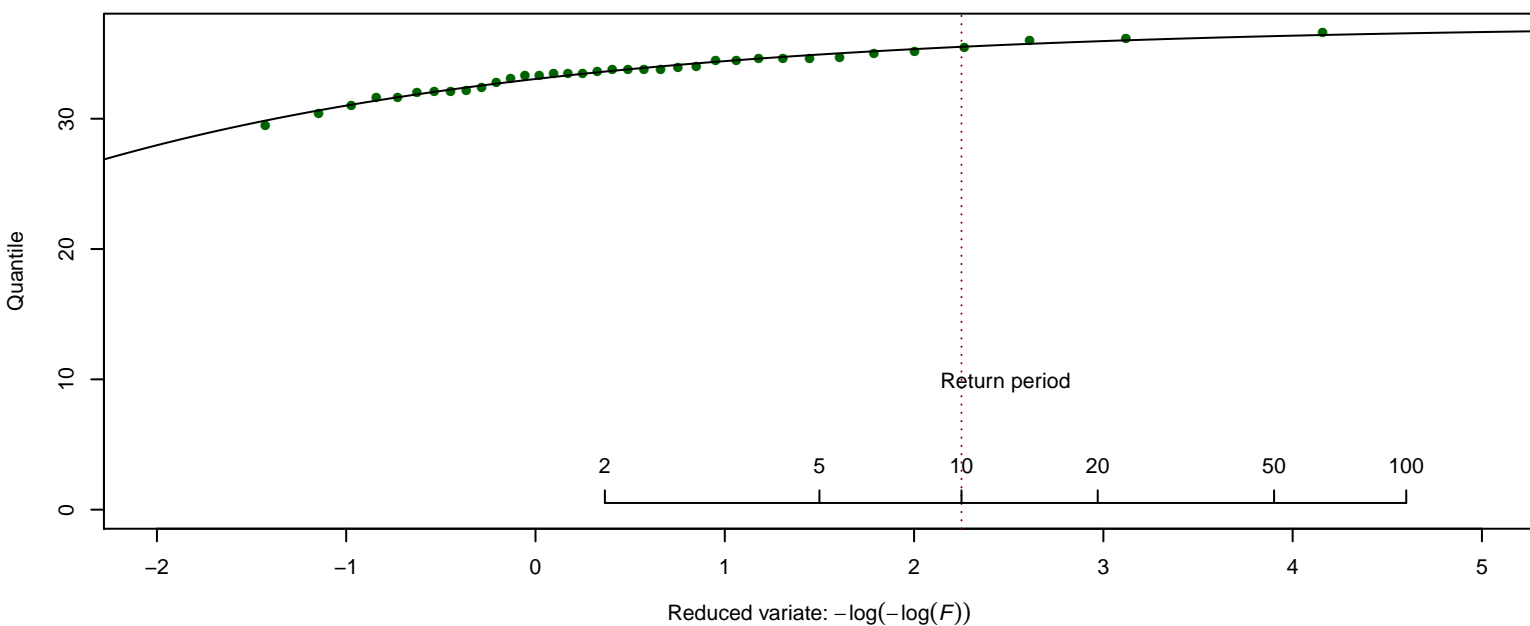

**Brenner  
Weibull (1939)**

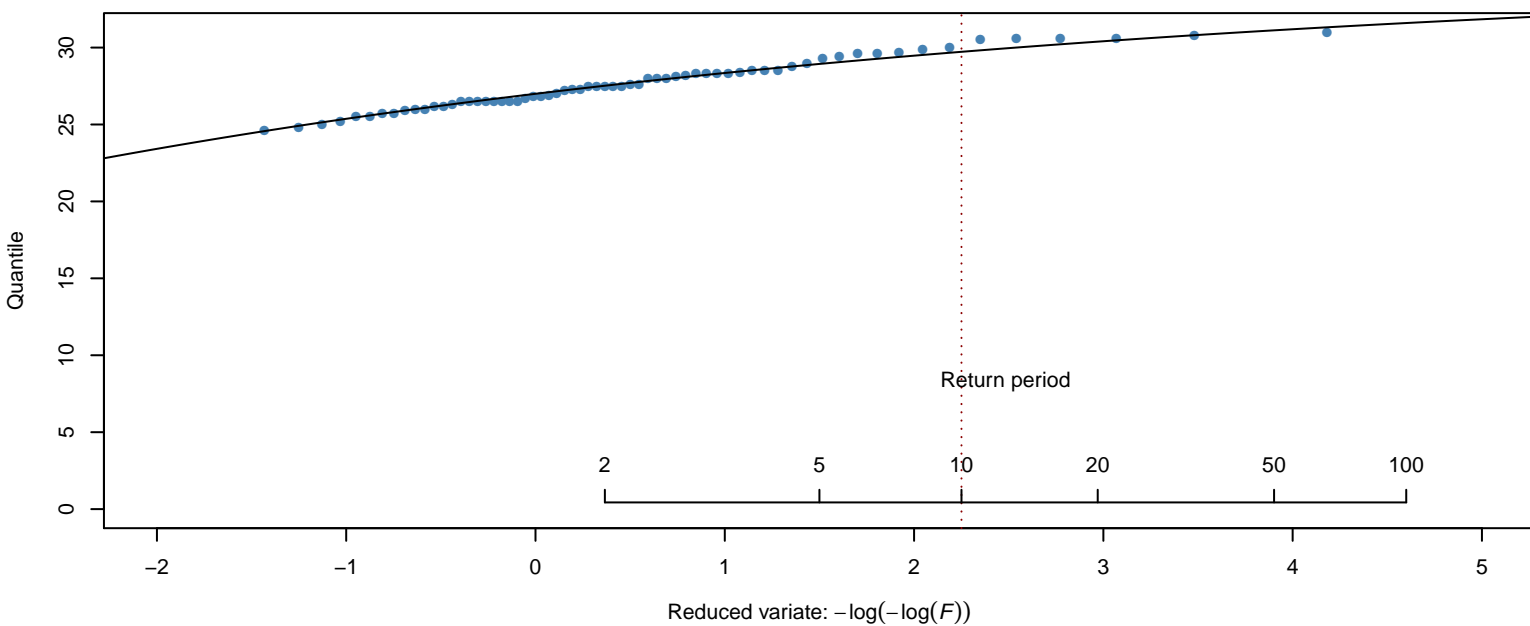

**Beard (1943)**

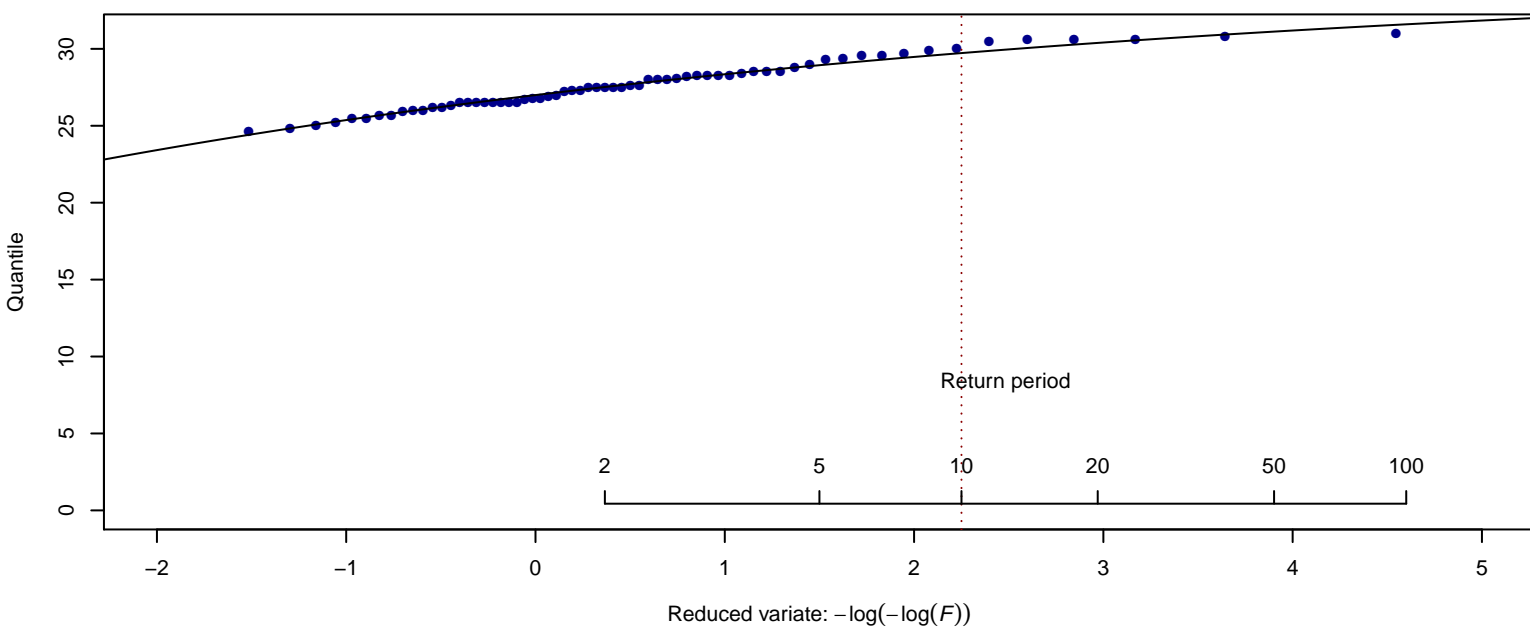

**Gringorten (1963)**

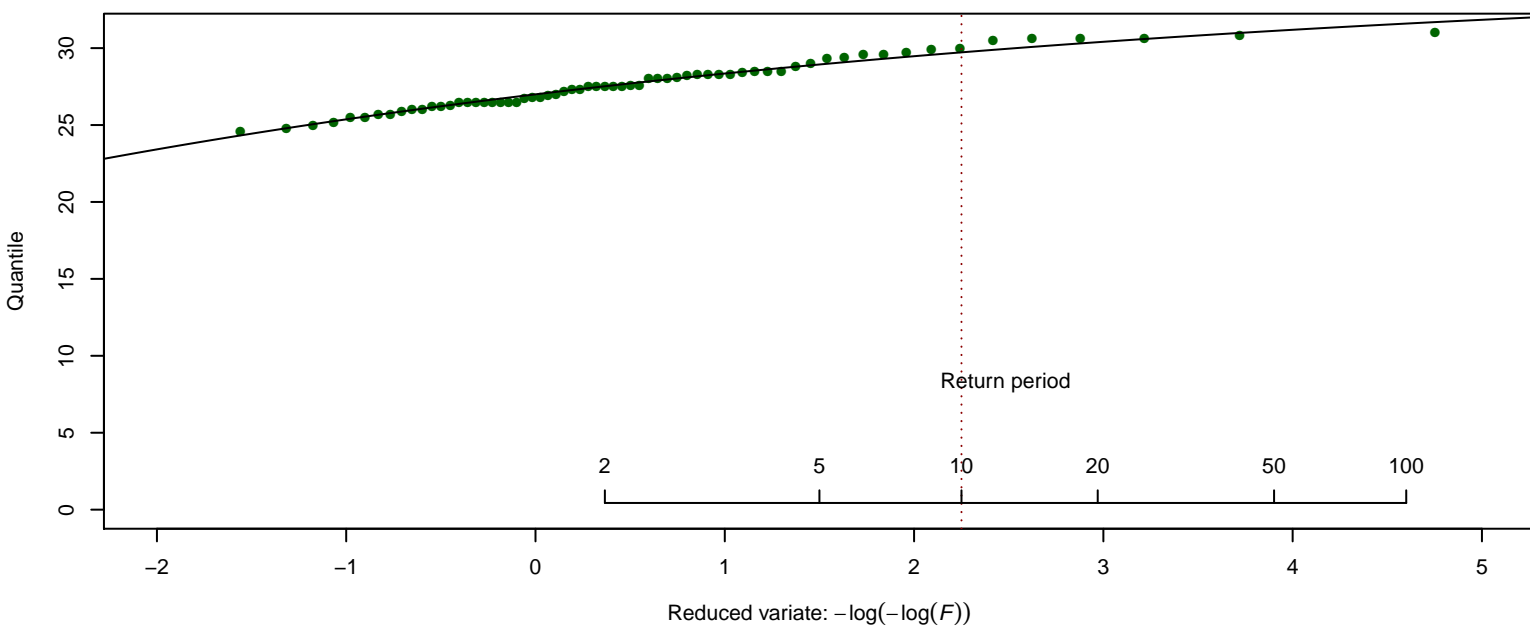

Bruck\_Mur  
Weibull (1939)

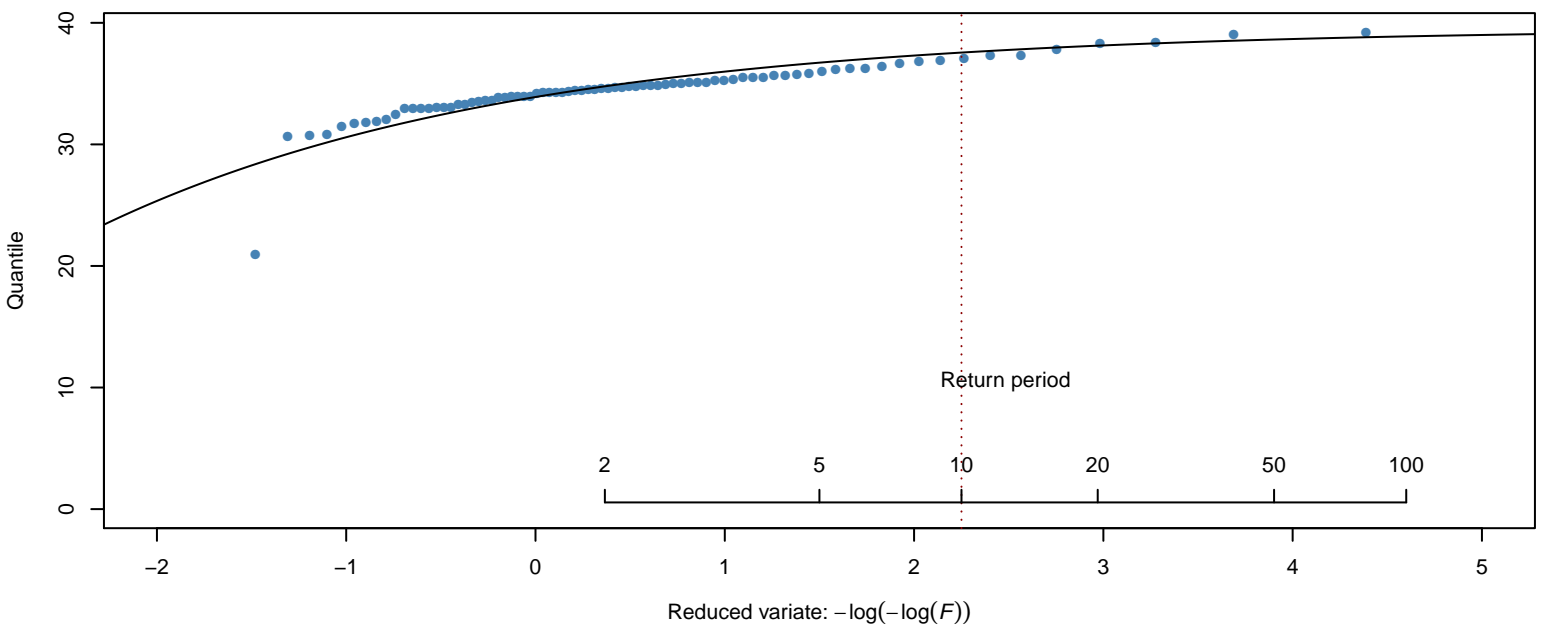

Beard (1943)

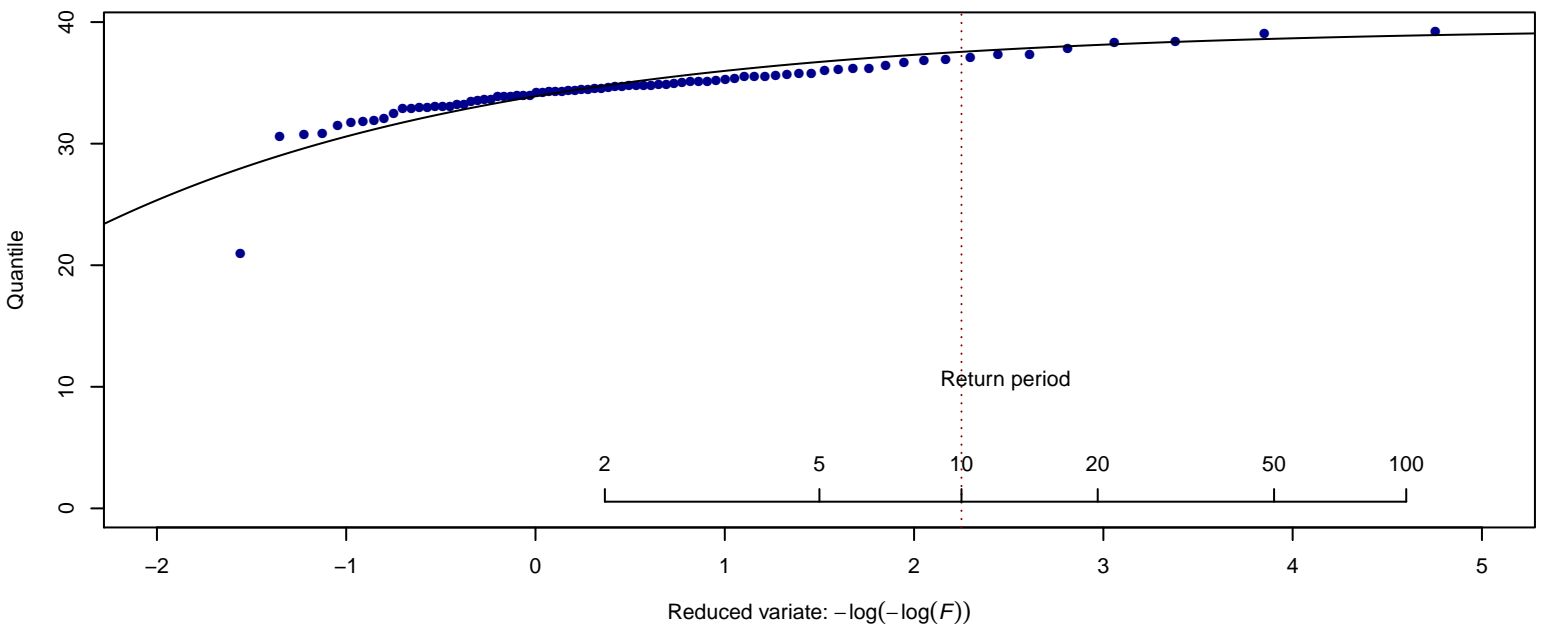

Gringorten (1963)

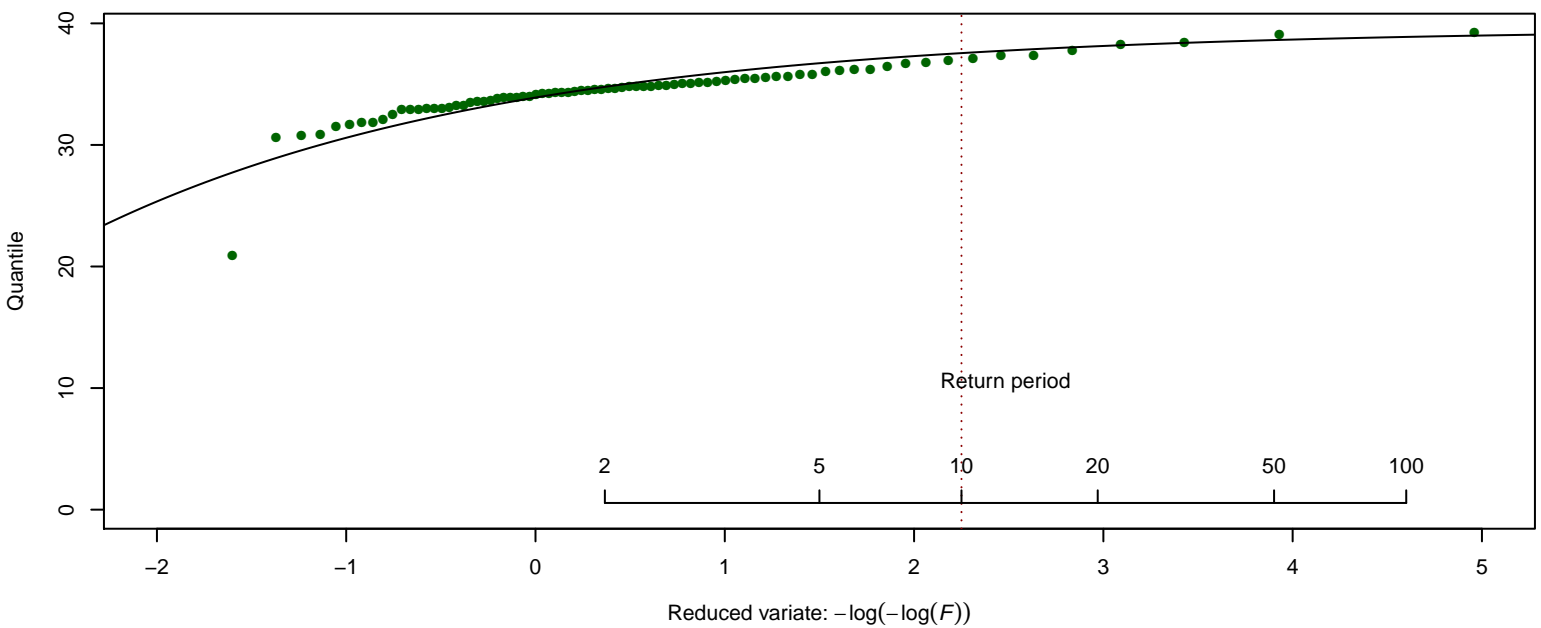

Bruckneudorf  
Weibull (1939)

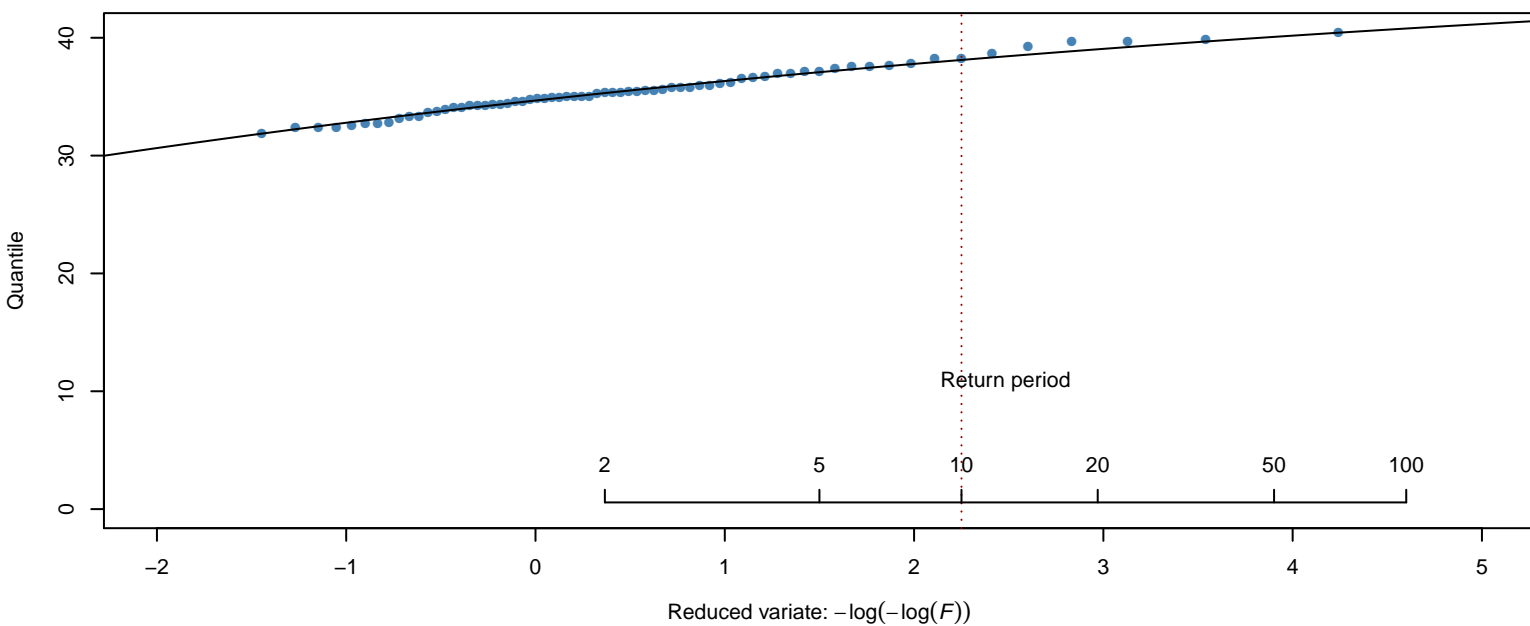

Beard (1943)

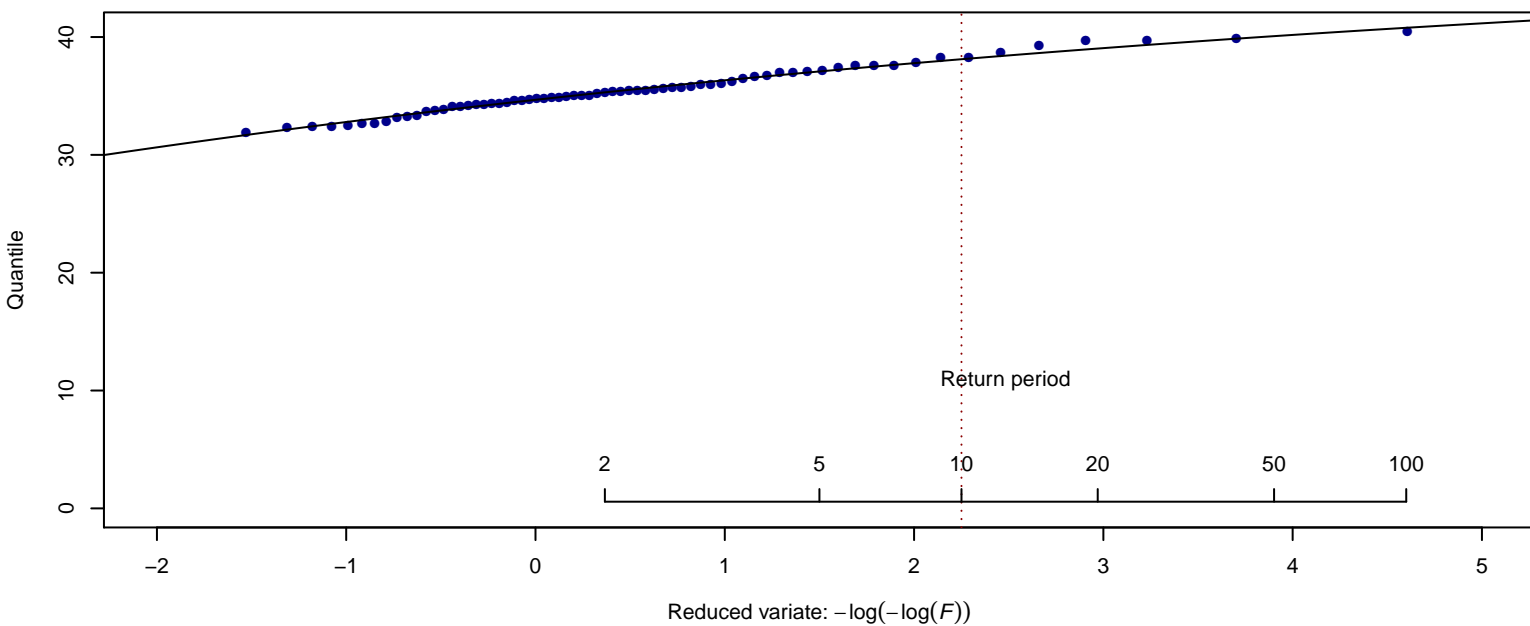

Gringorten (1963)

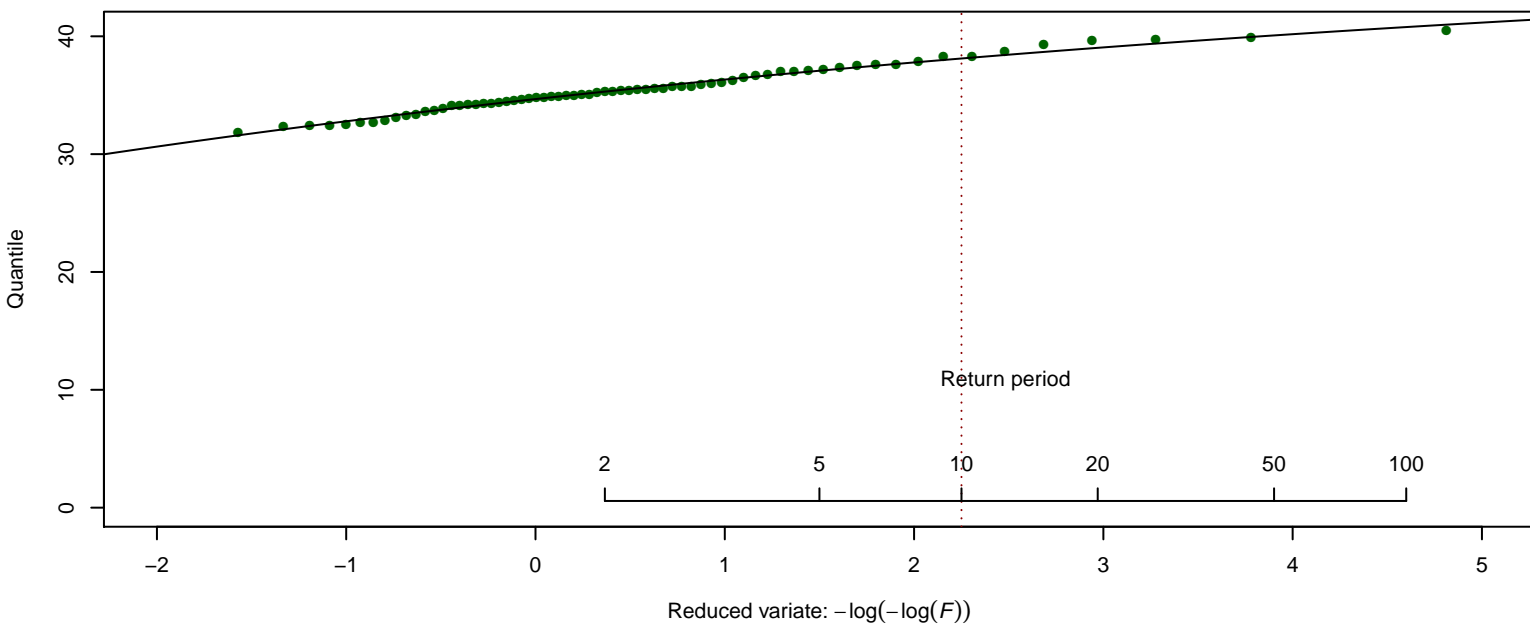

Eisenstadt  
Weibull (1939)

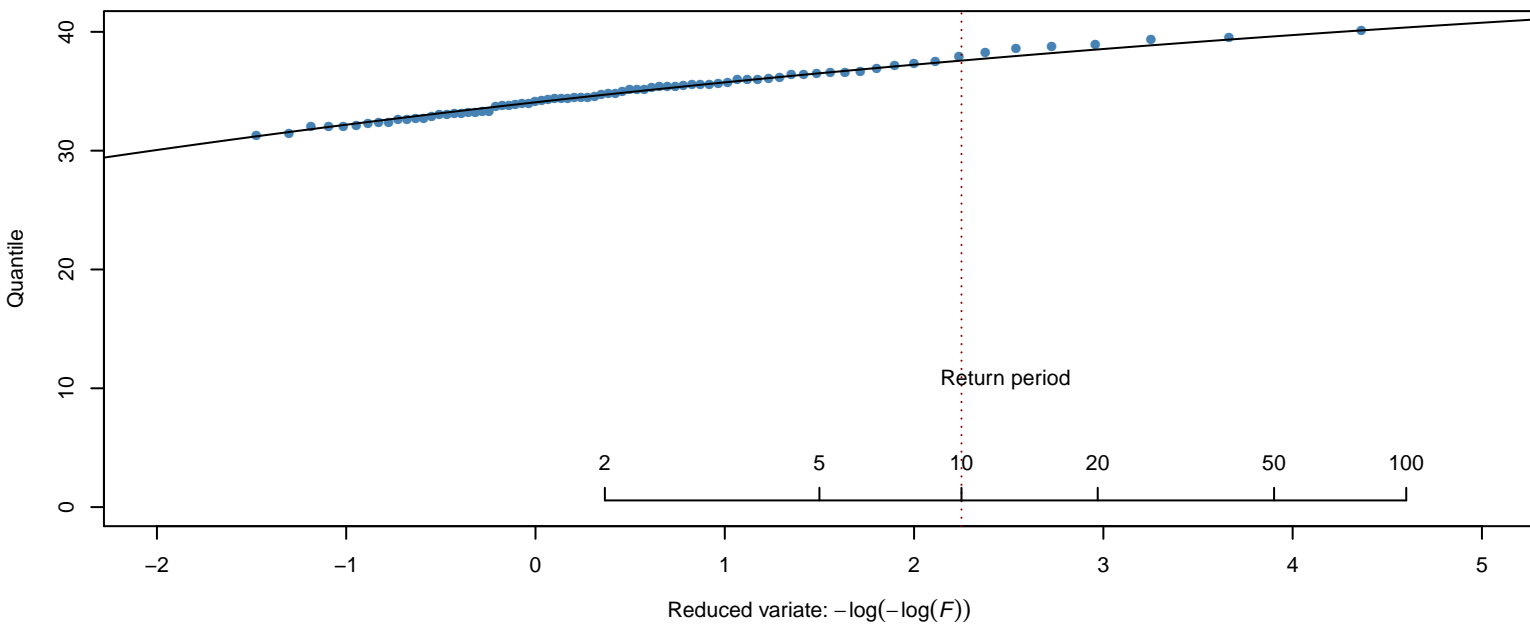

Beard (1943)

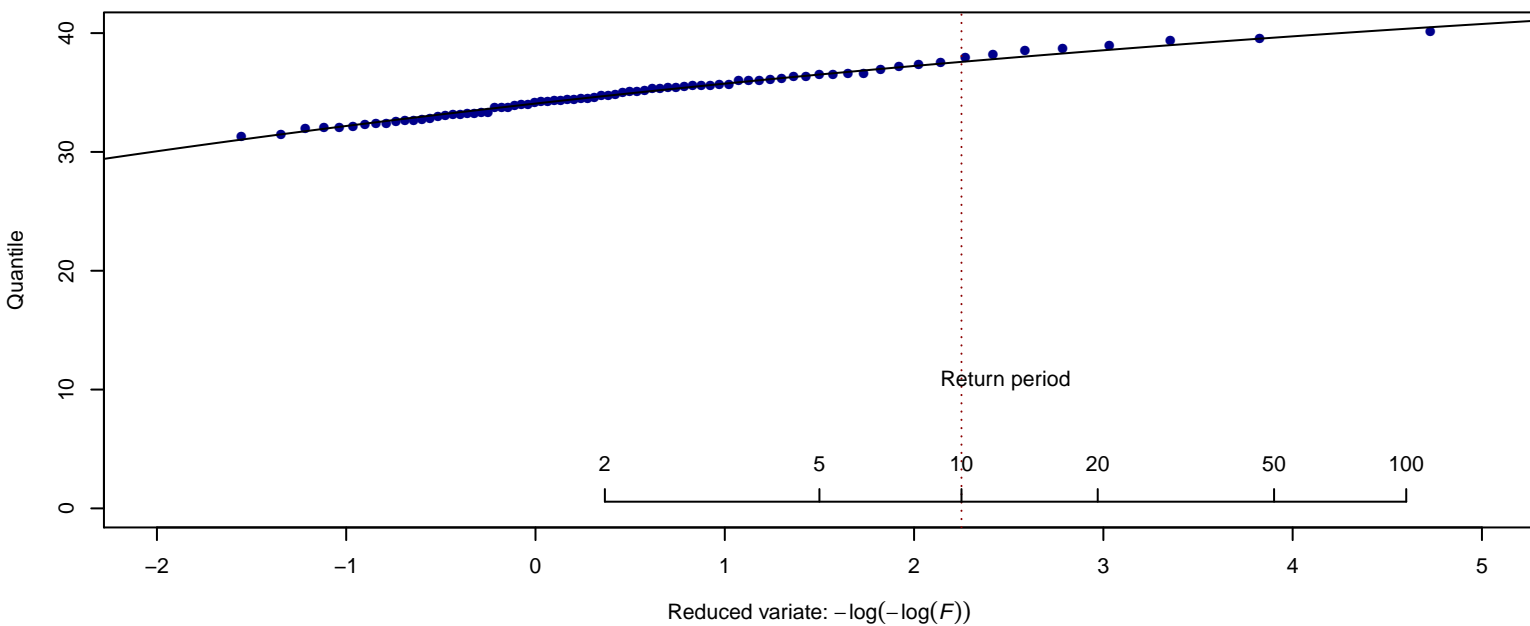

Gringorten (1963)

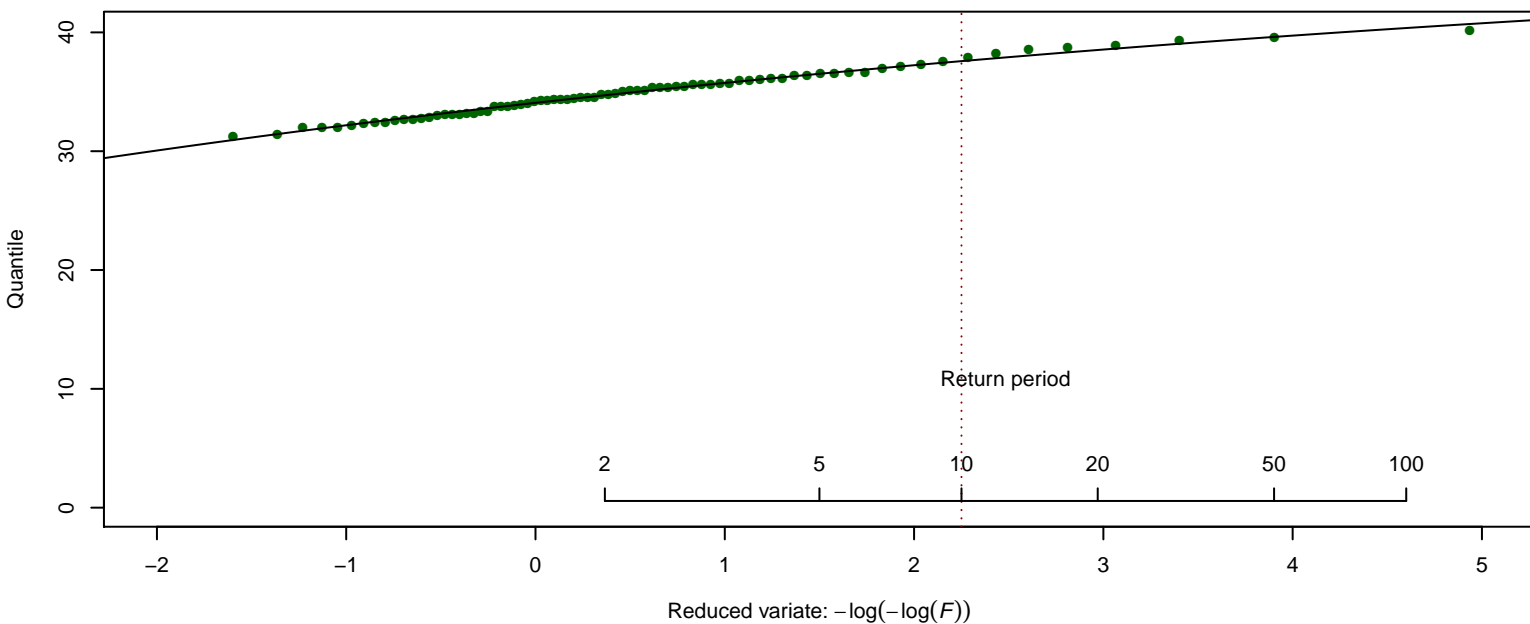

Feldkirch  
Weibull (1939)

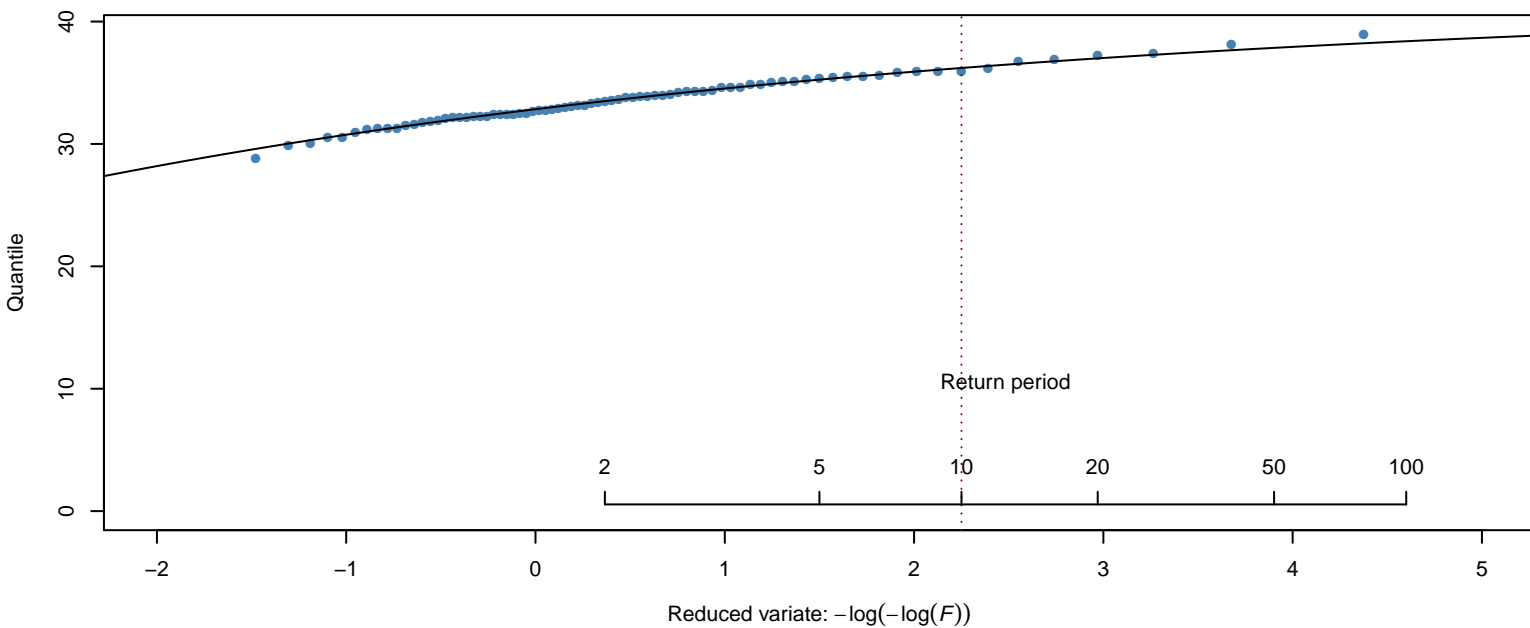

Beard (1943)

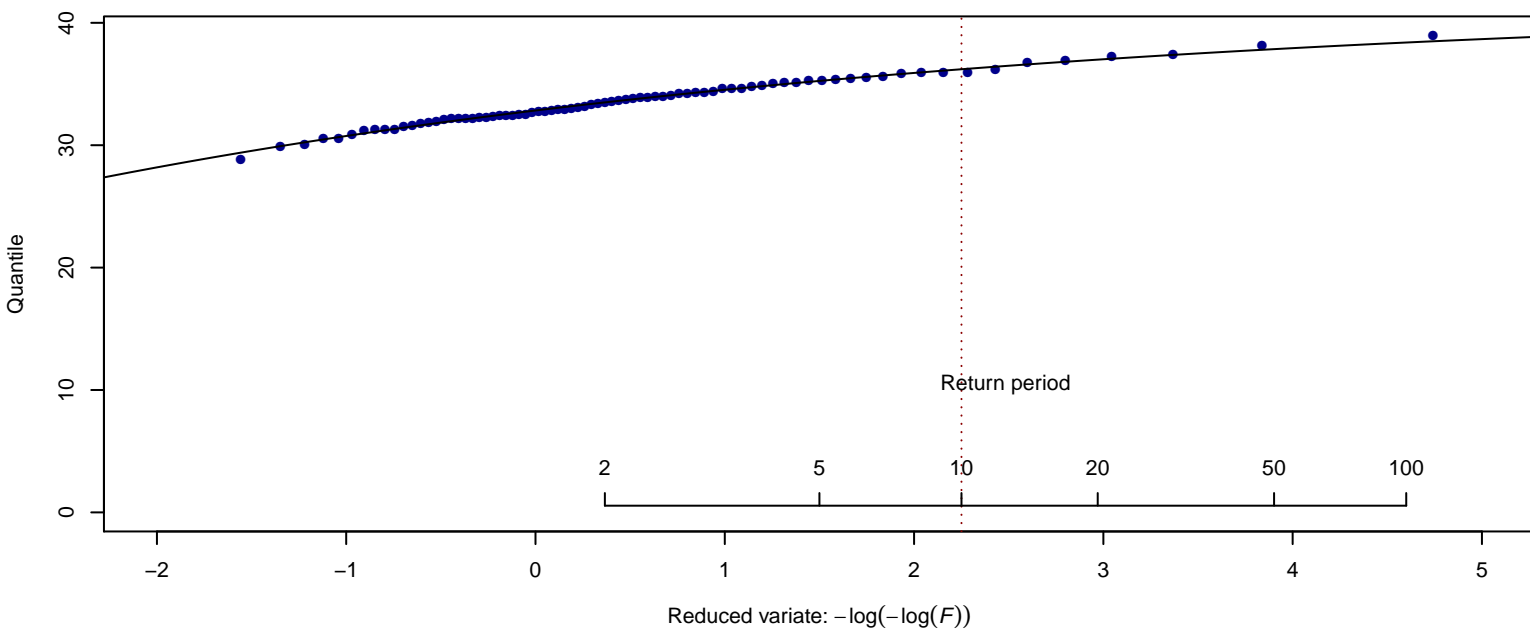

Gringorten (1963)

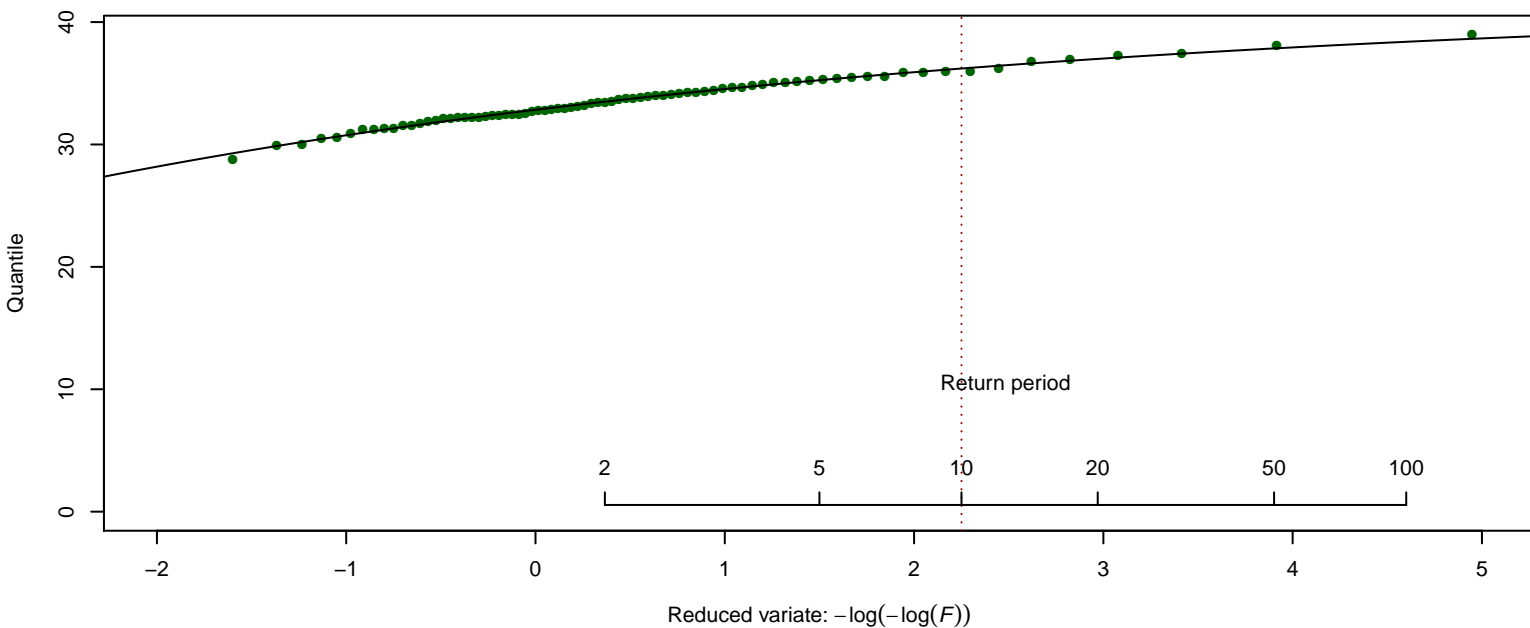

Fuerstenfeld  
Weibull (1939)

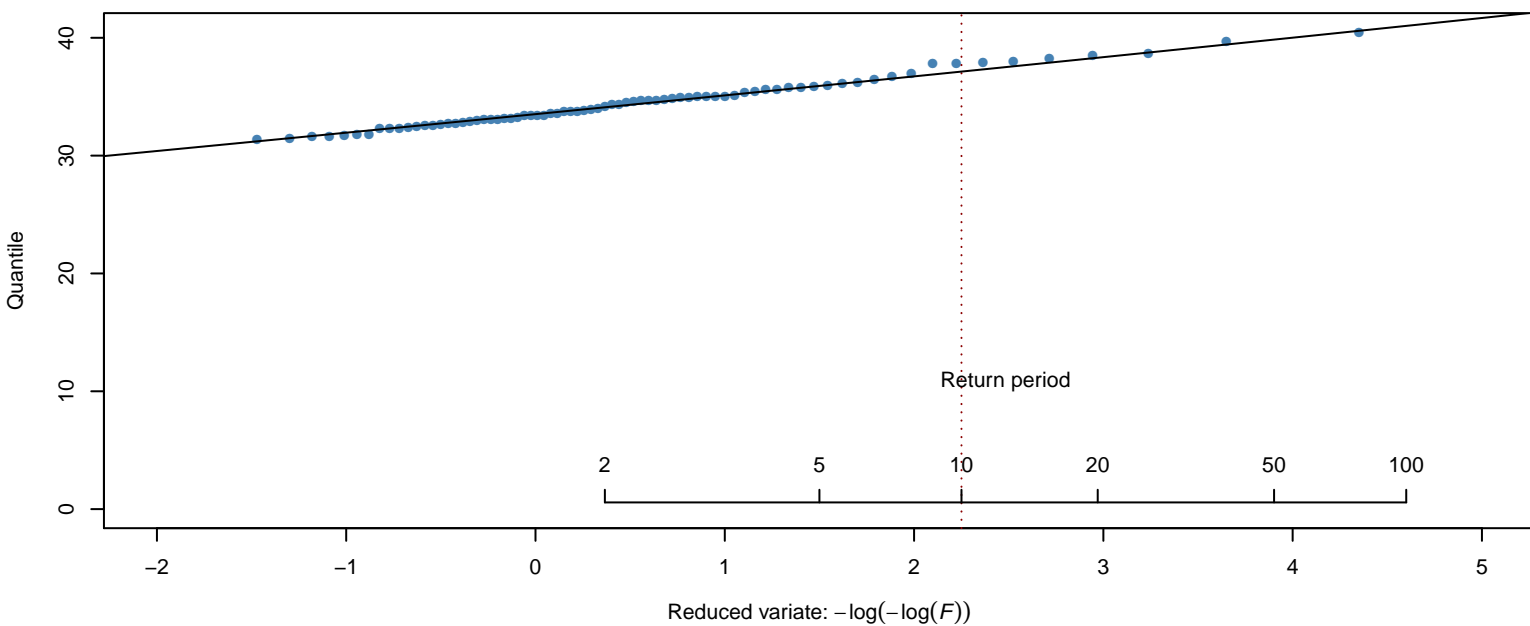

Beard (1943)

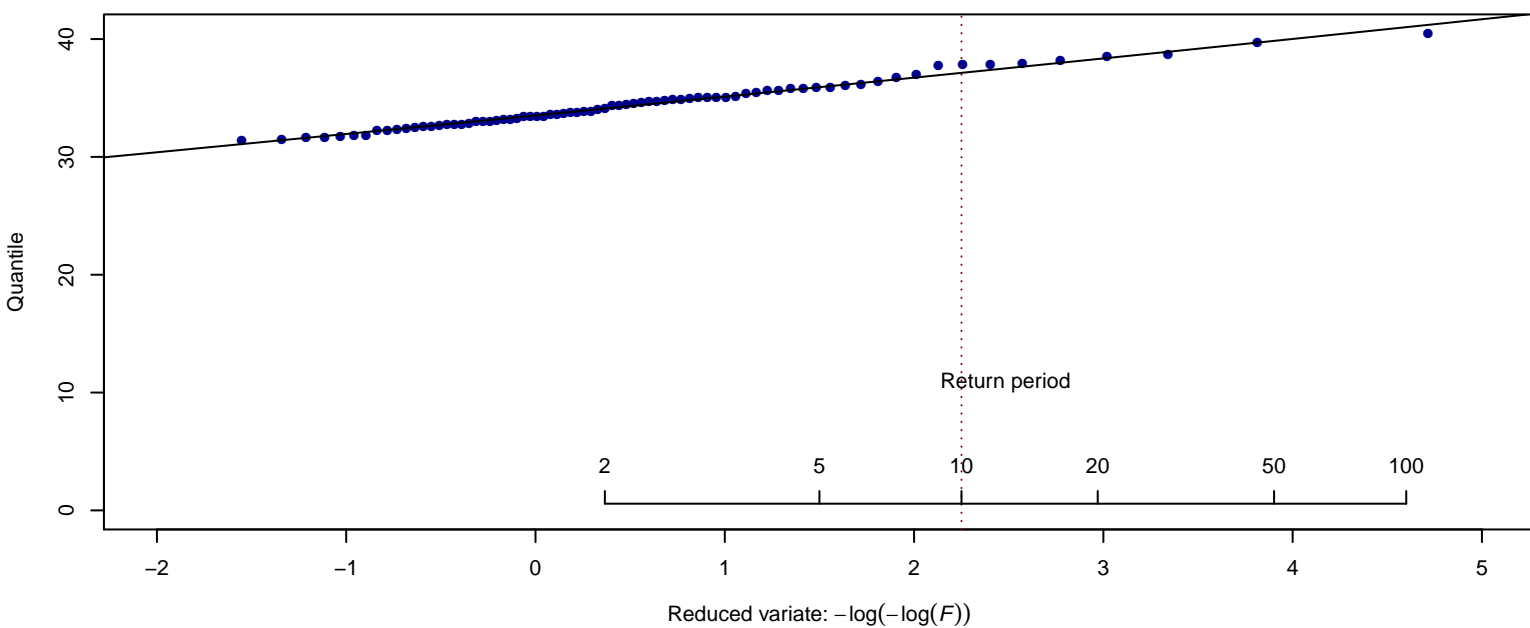

Gringorten (1963)

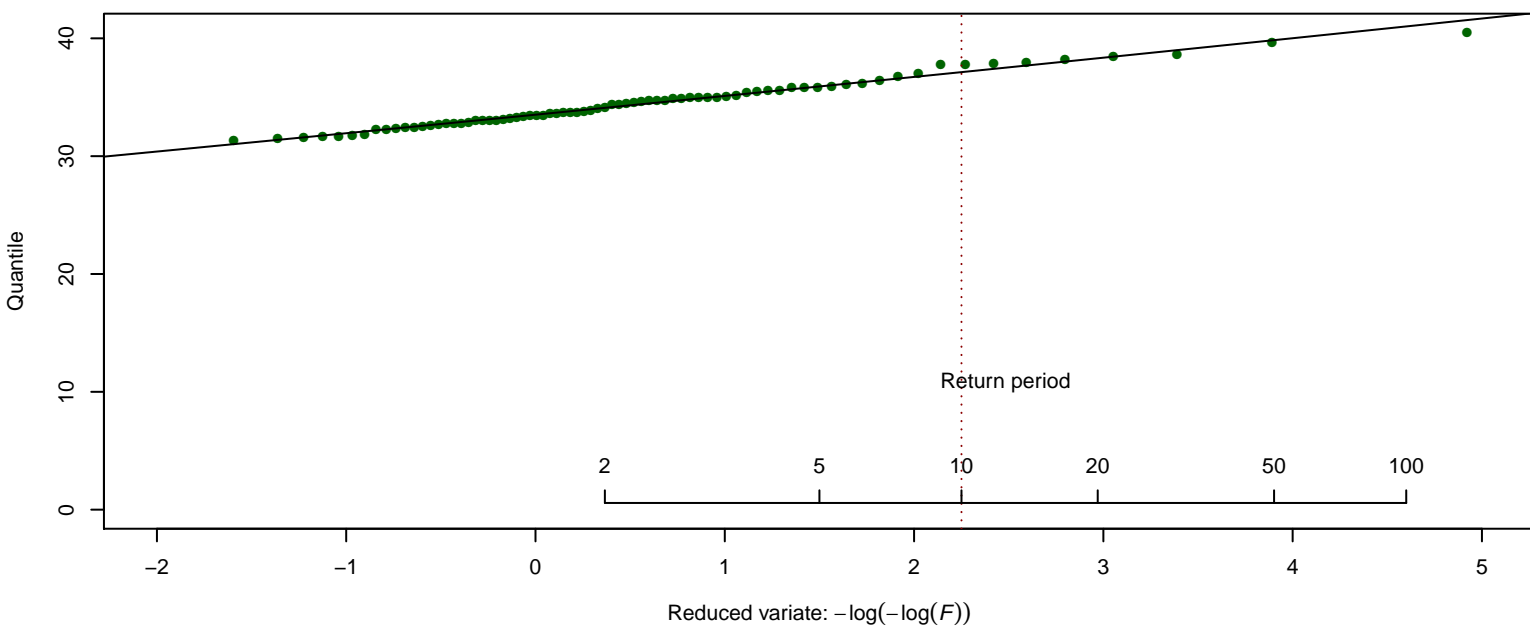

Gmunden  
Weibull (1939)

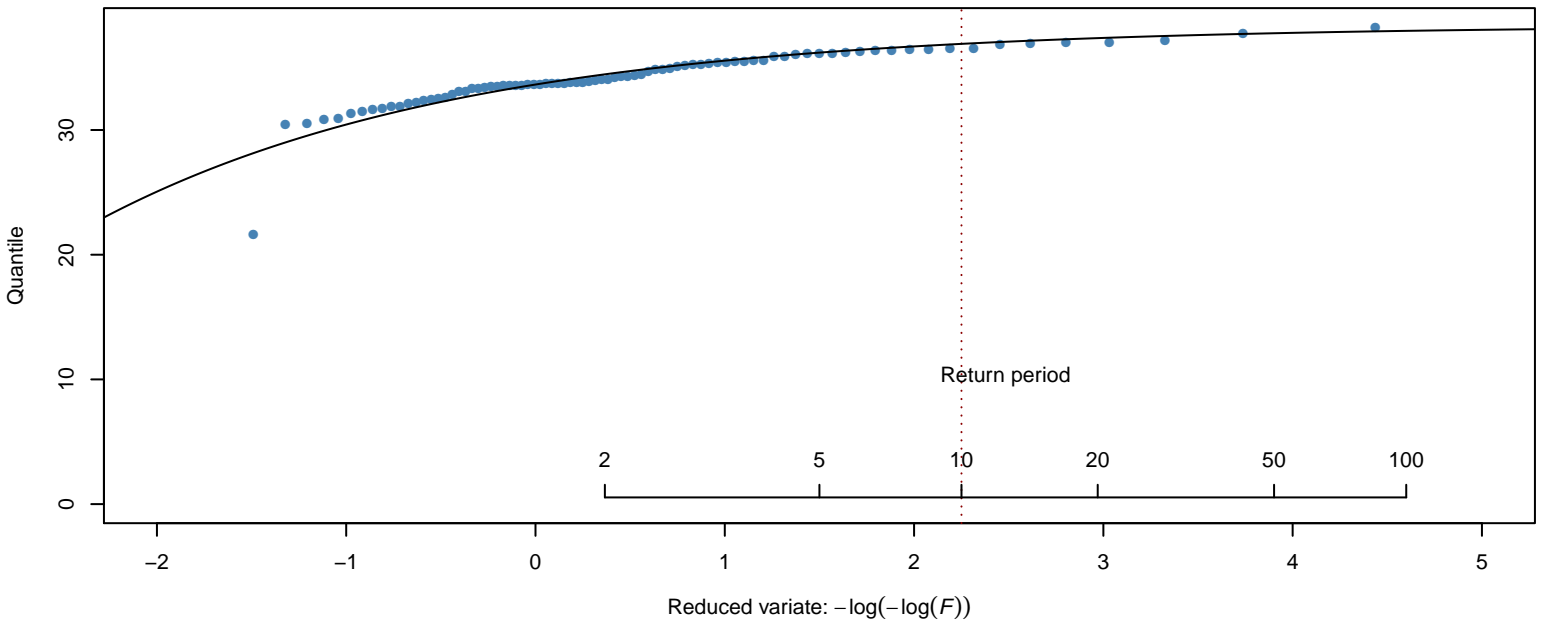

Beard (1943)

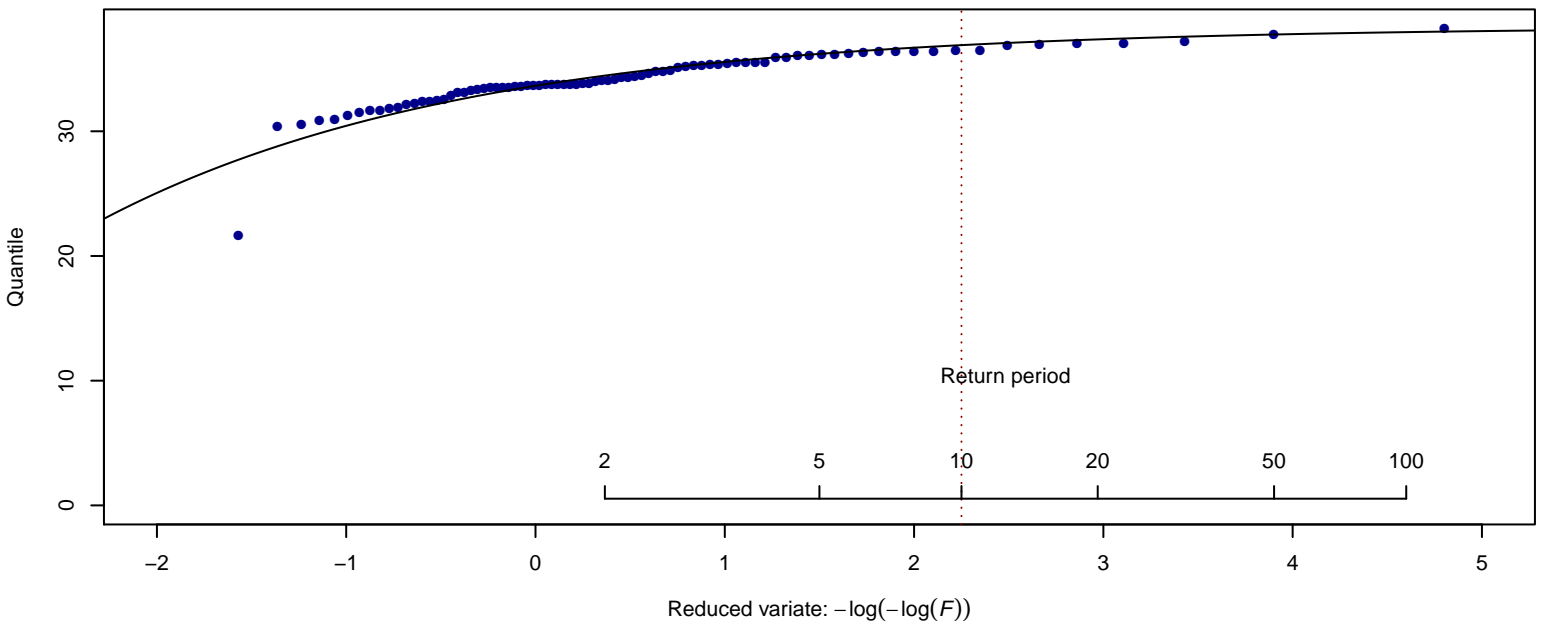

Gringorten (1963)

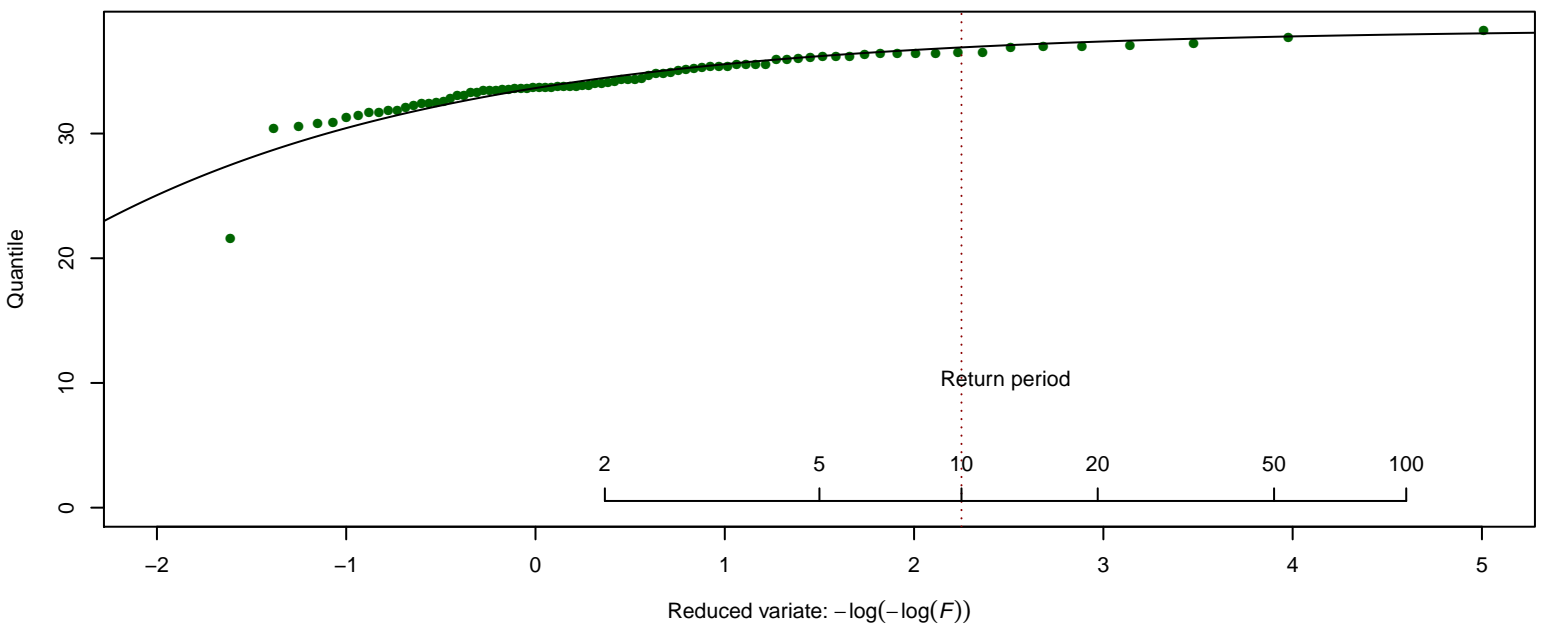



Graz  
Weibull (1939)

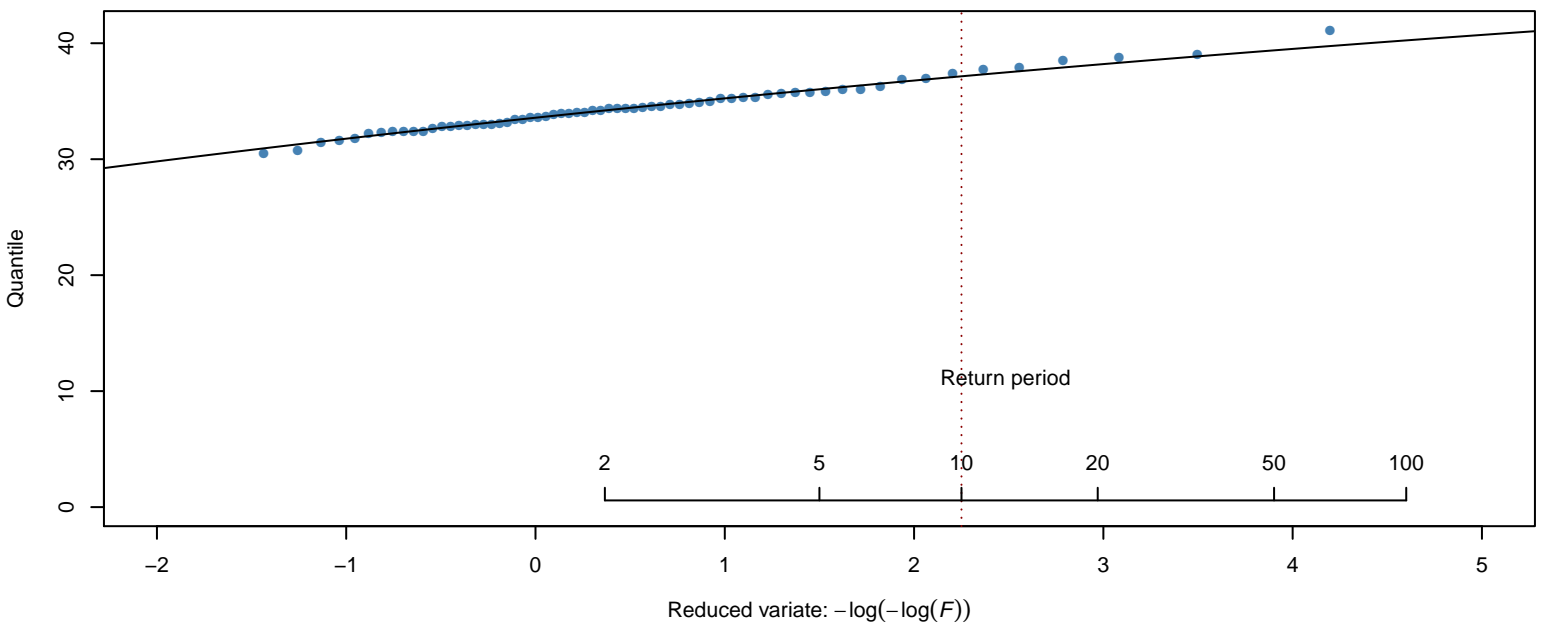

Beard (1943)

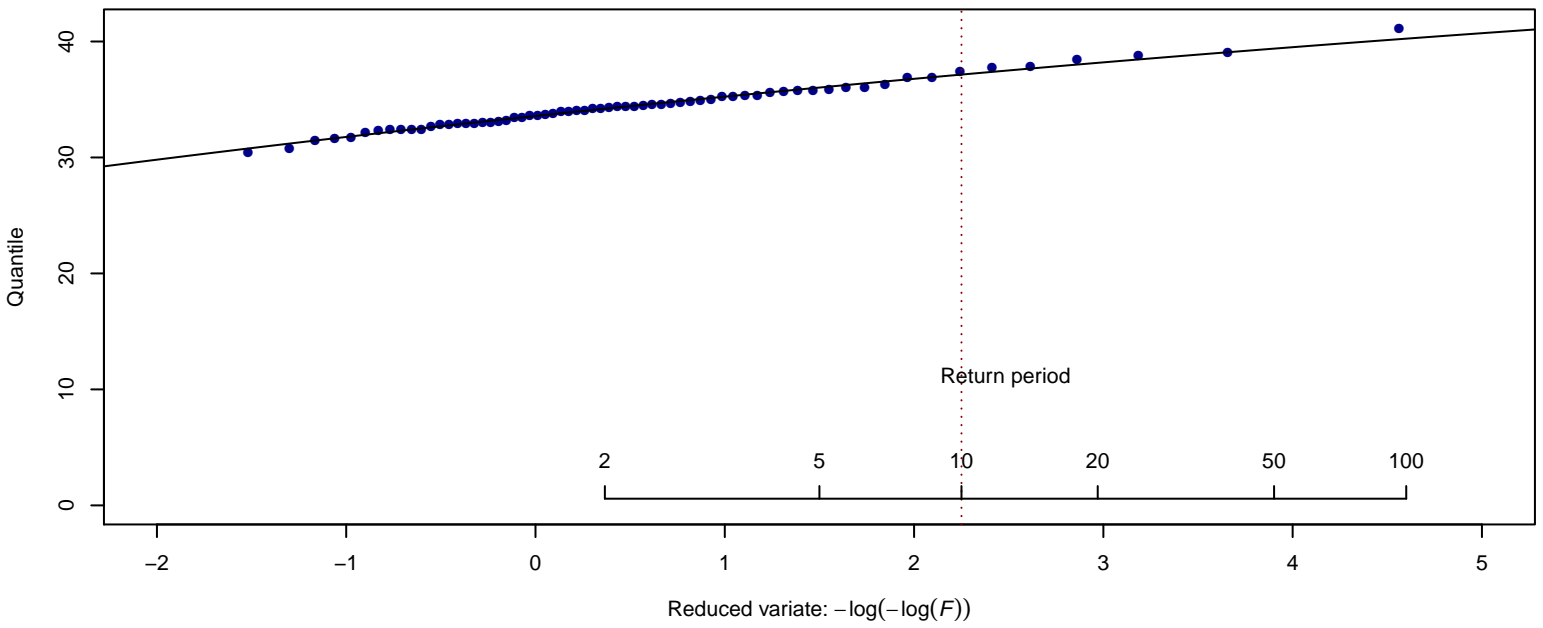

Gringorten (1963)

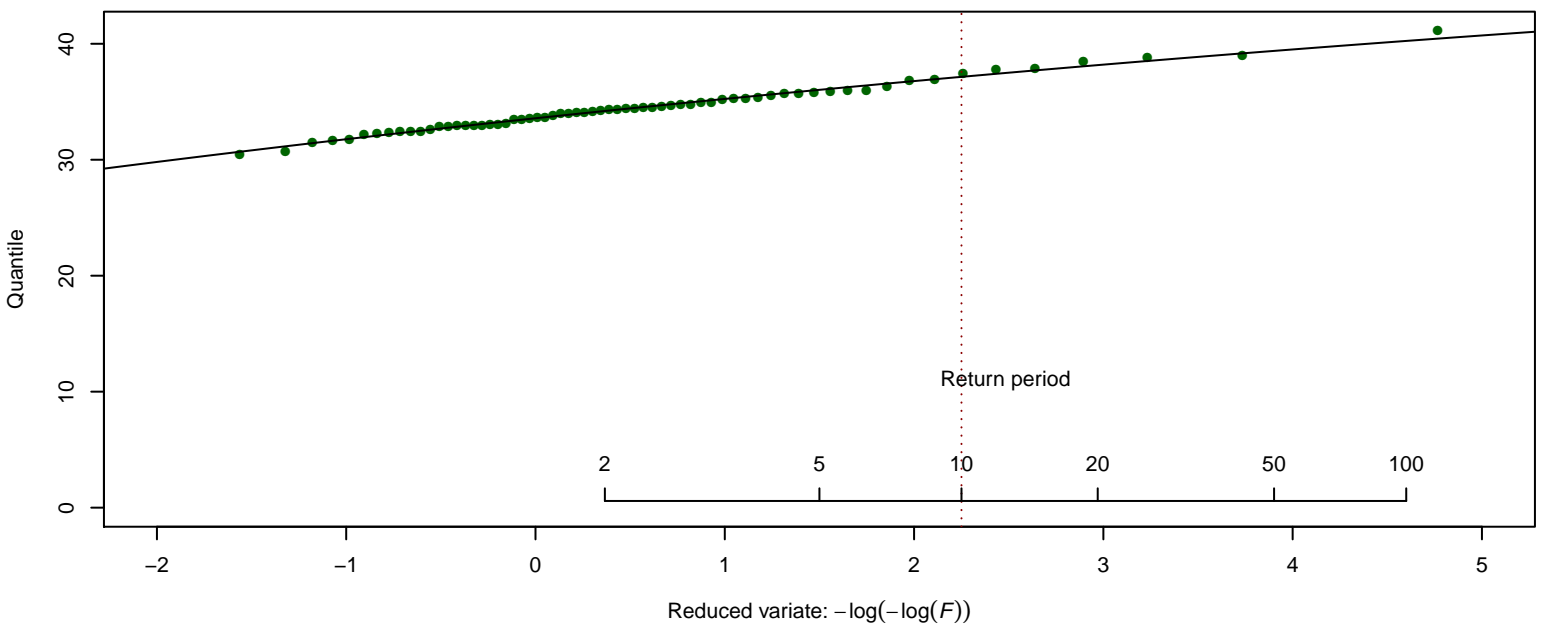

Haiming  
Weibull (1939)

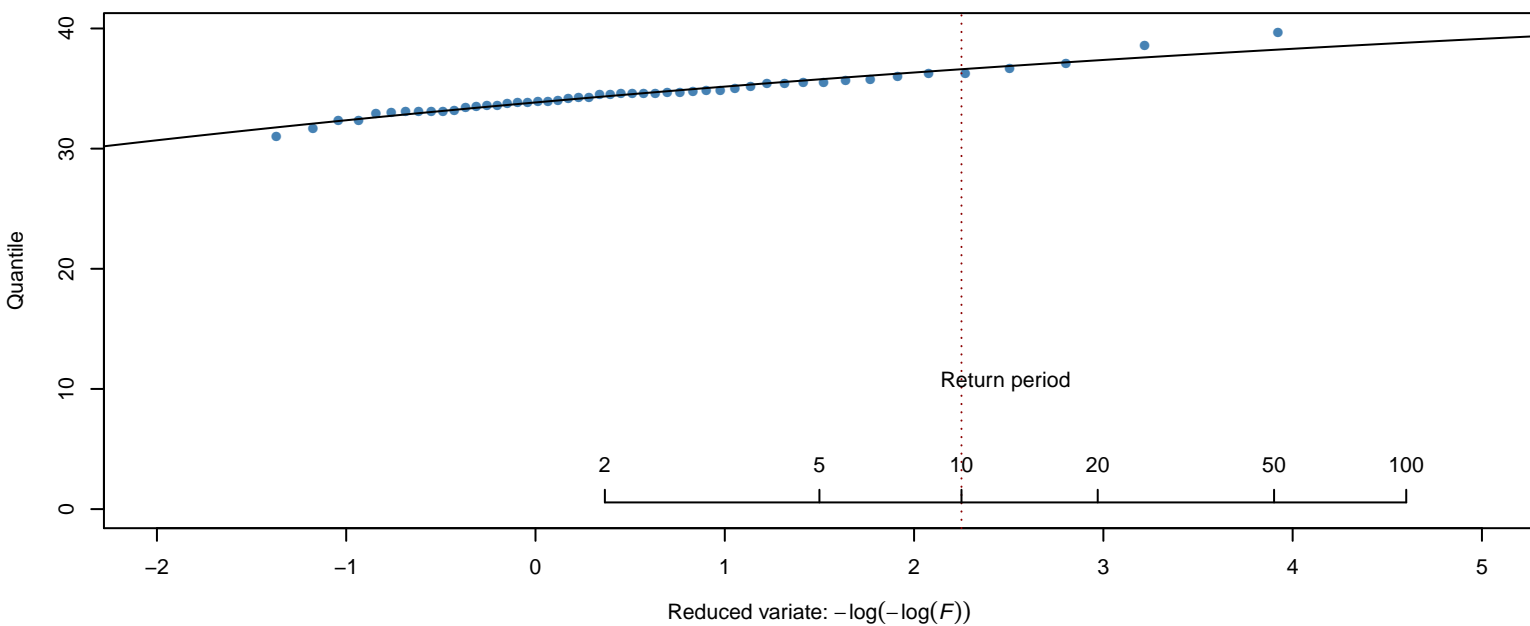

Beard (1943)

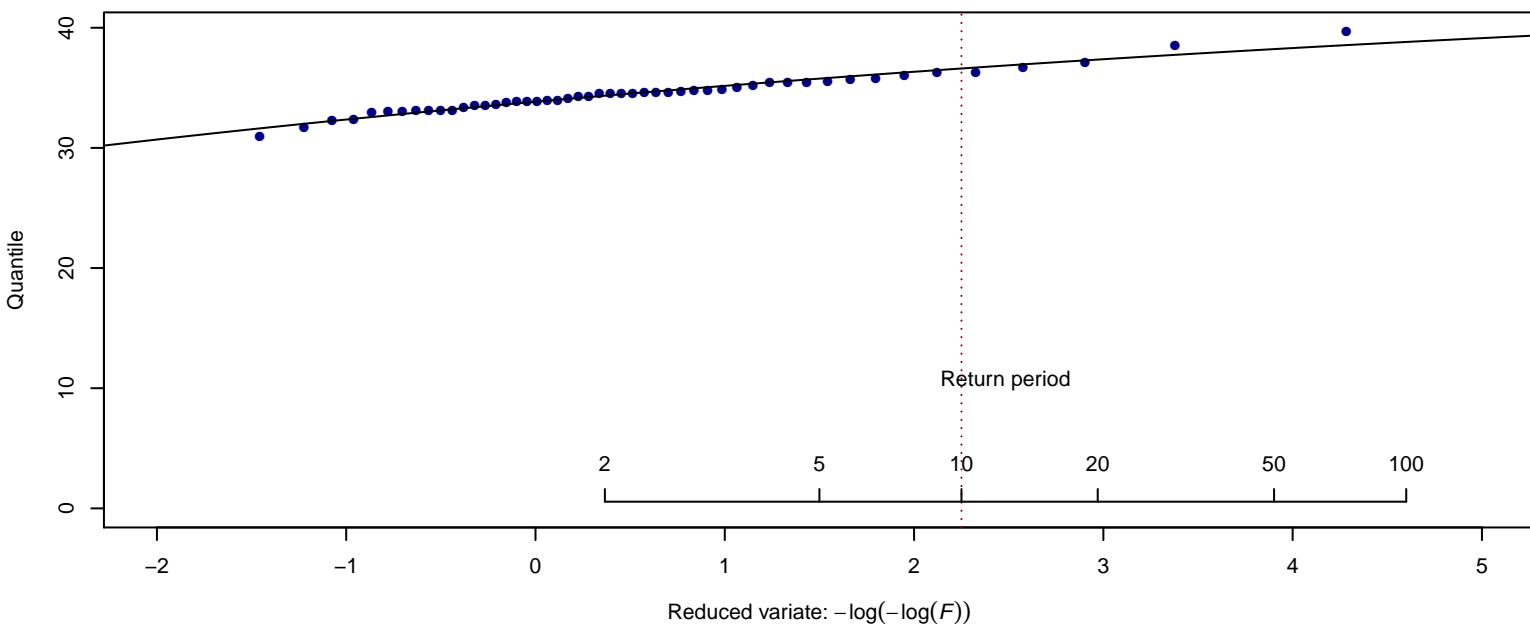

Gringorten (1963)

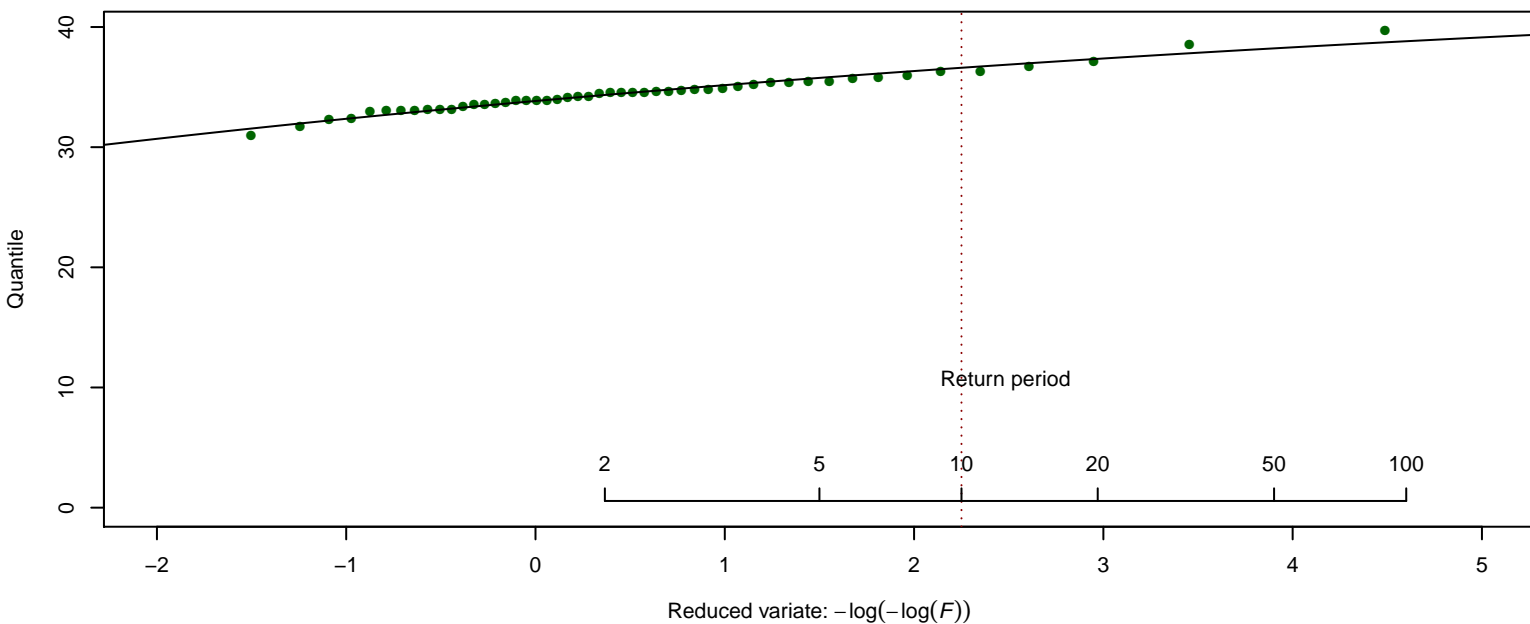

Hoerschling  
Weibull (1939)

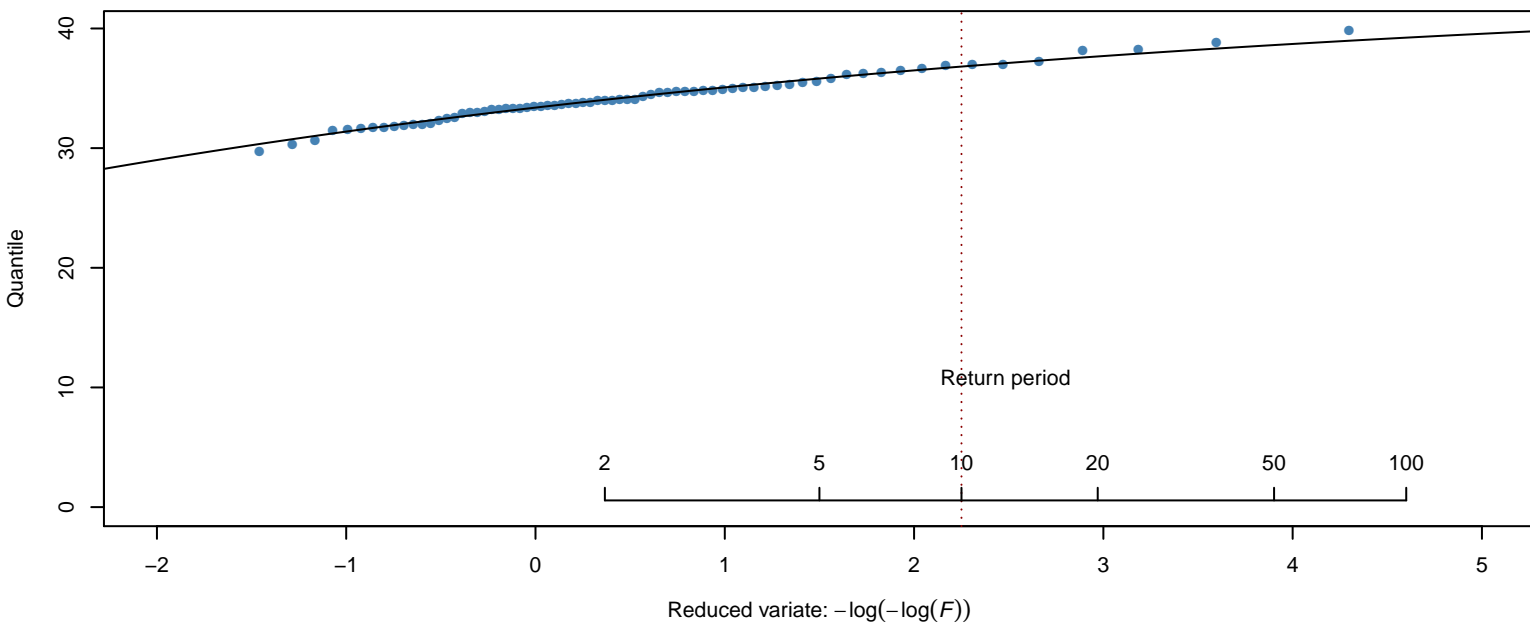

Beard (1943)

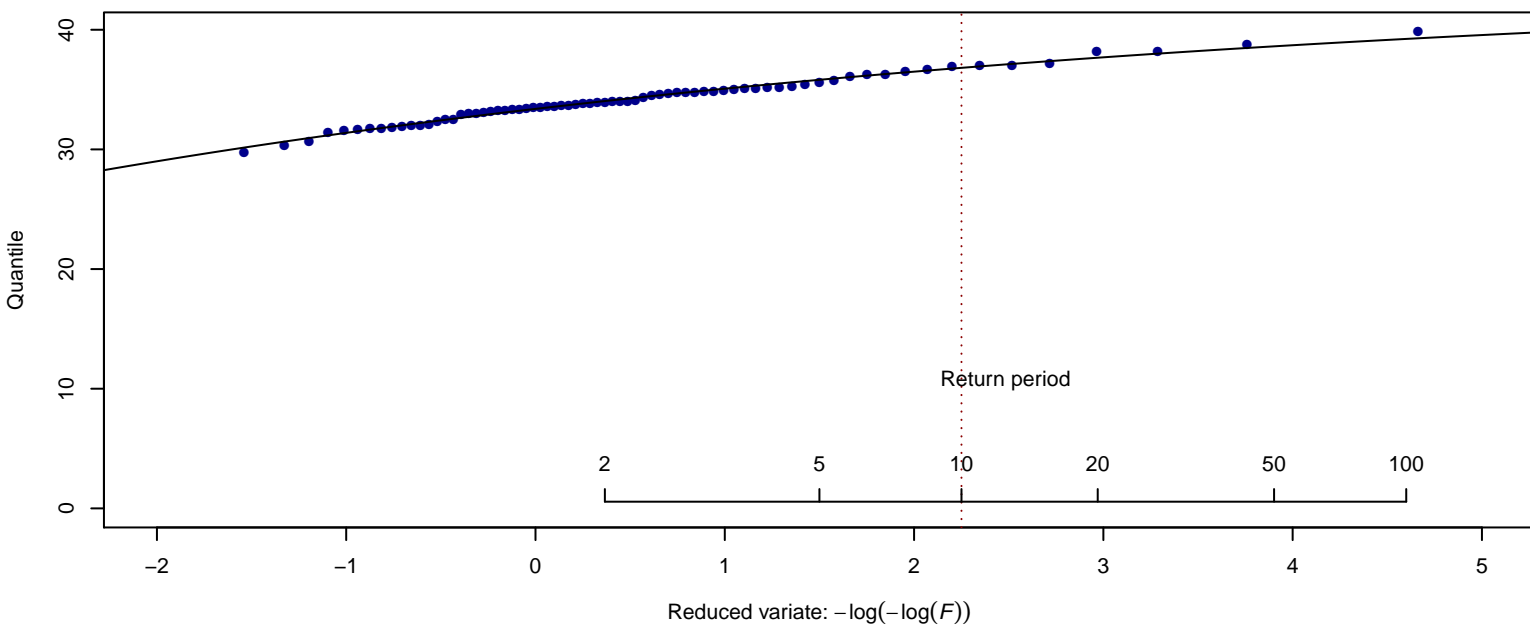

Gringorten (1963)

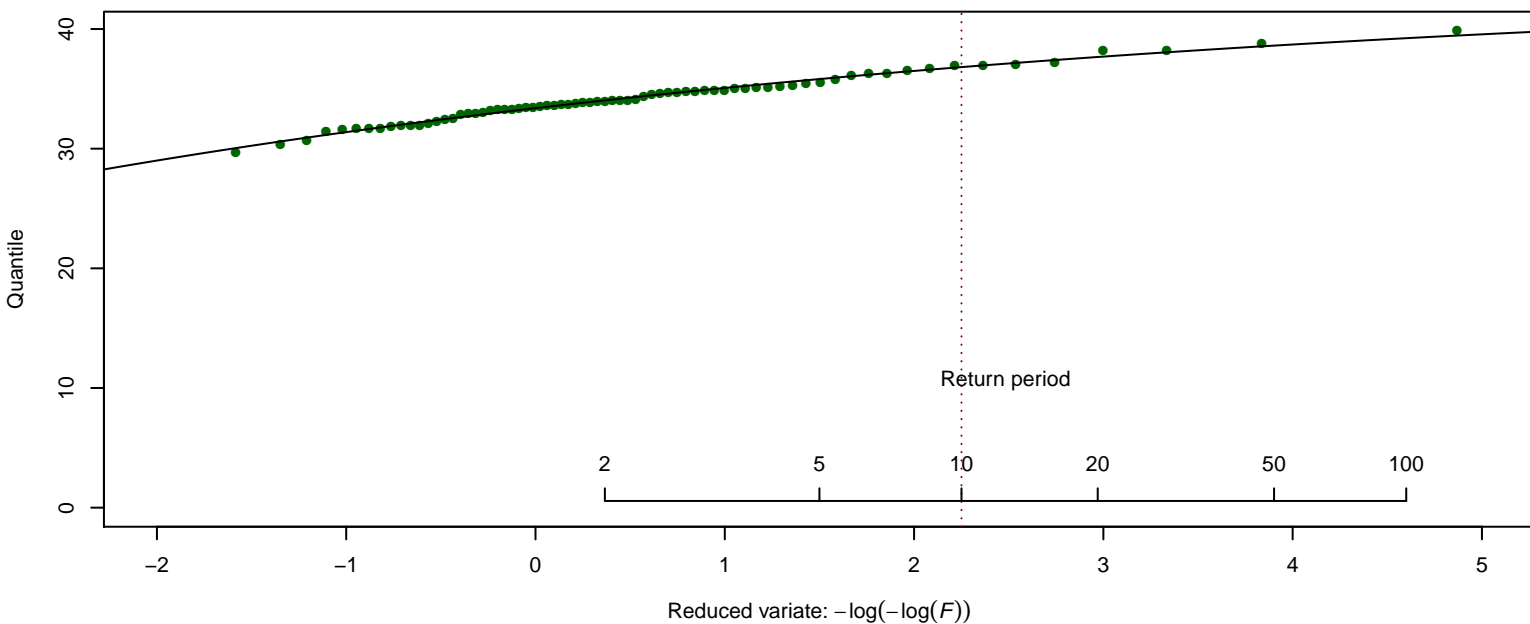

**Innsbruck  
Weibull (1939)**

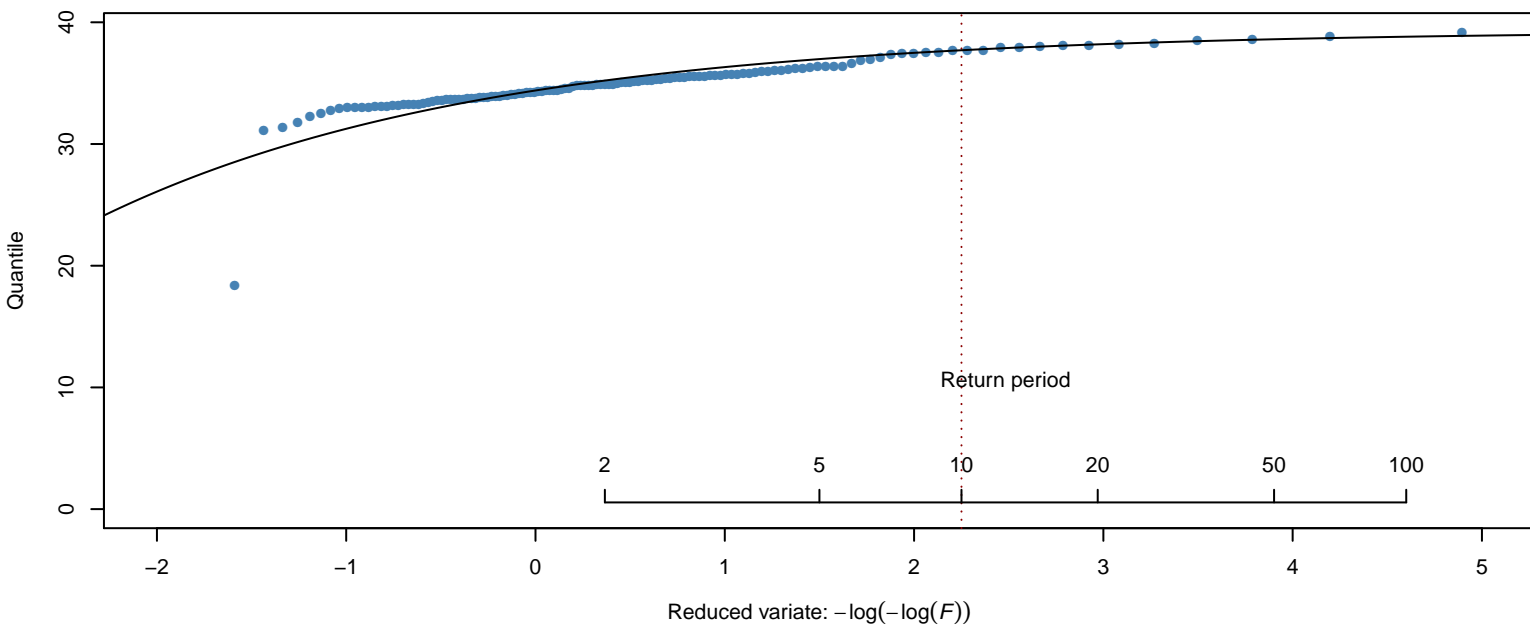

**Beard (1943)**

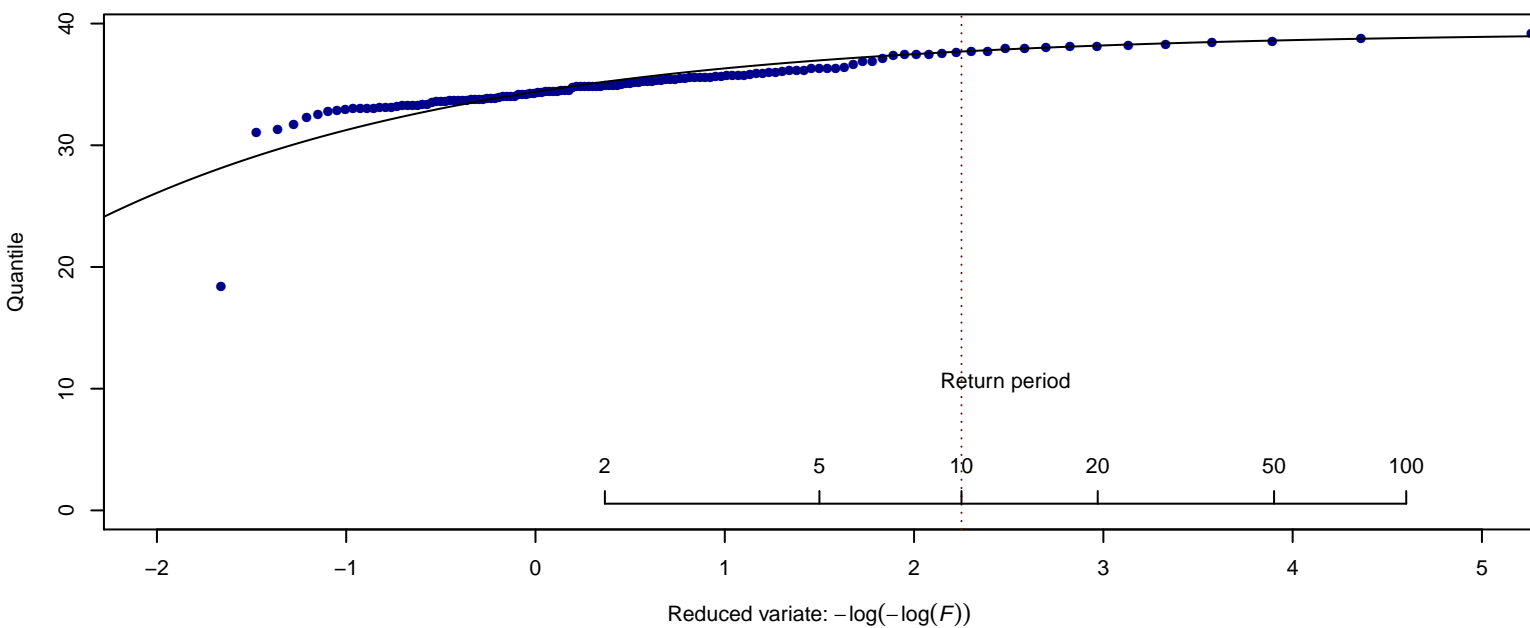

**Gringorten (1963)**

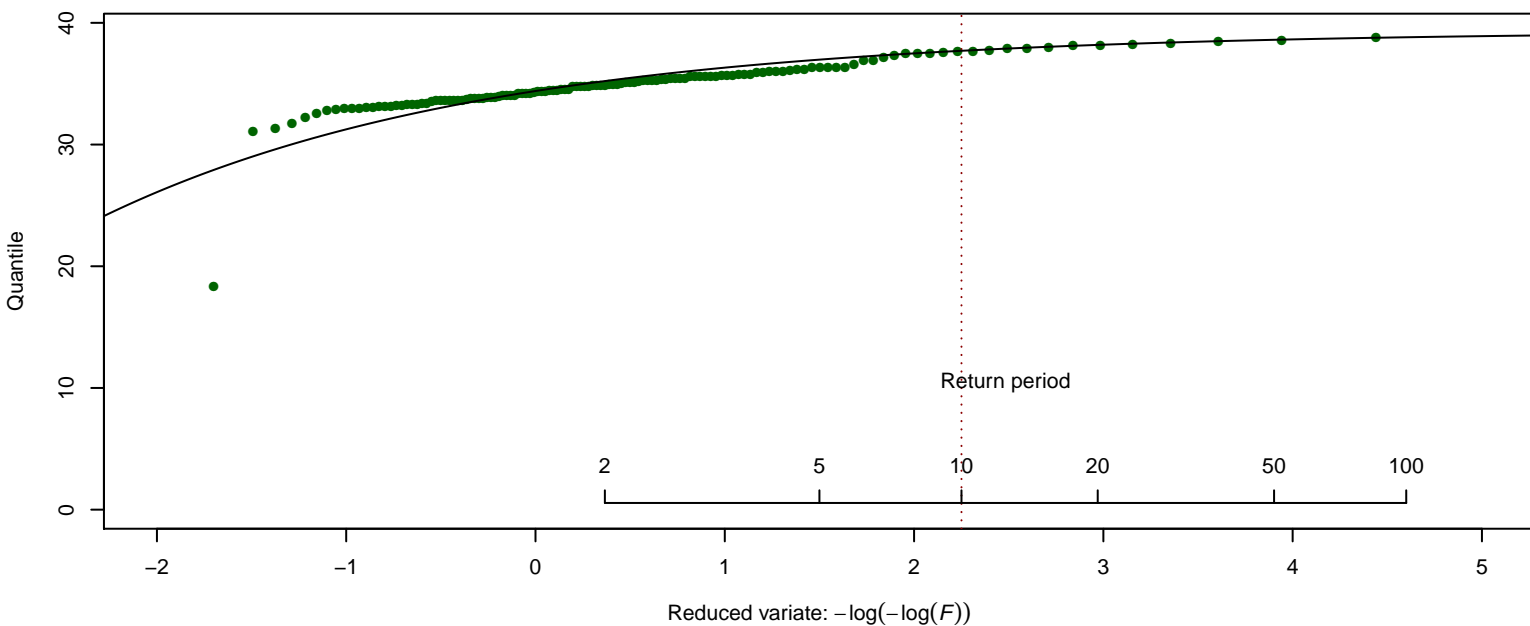

Kufstein  
Weibull (1939)

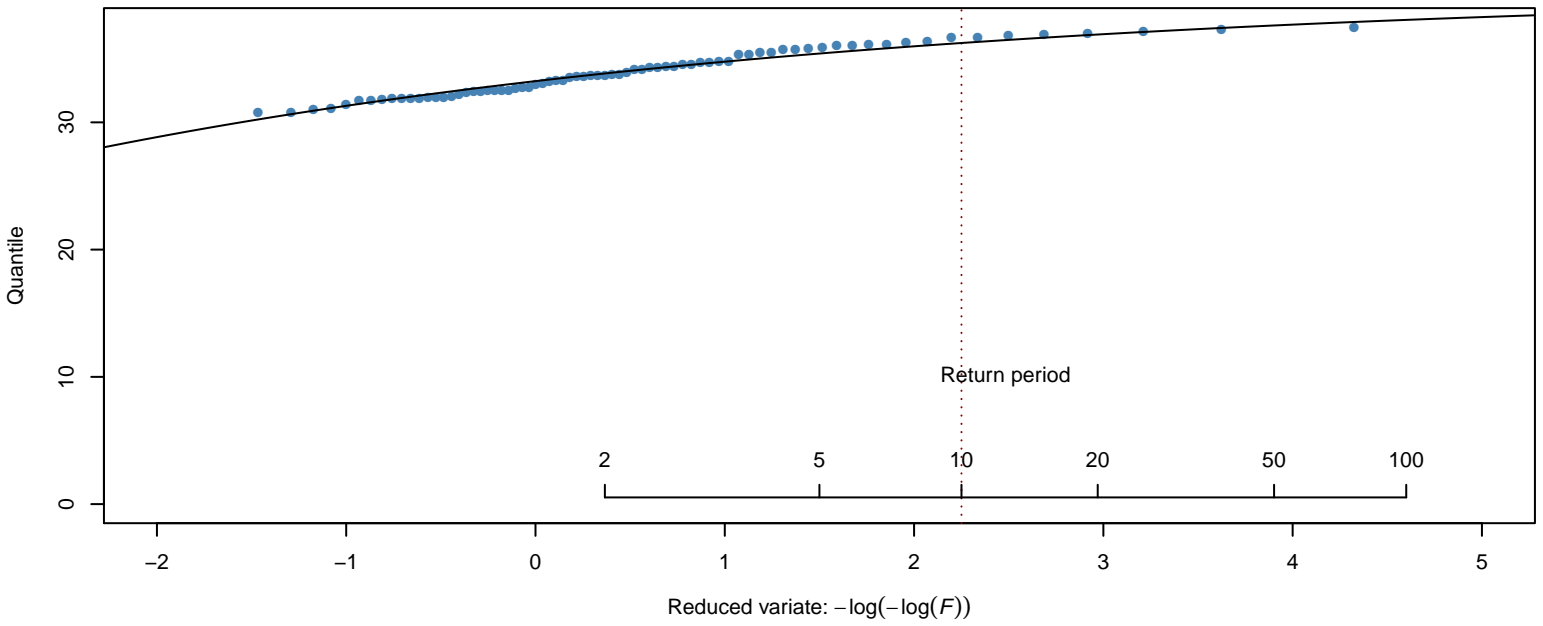

Beard (1943)

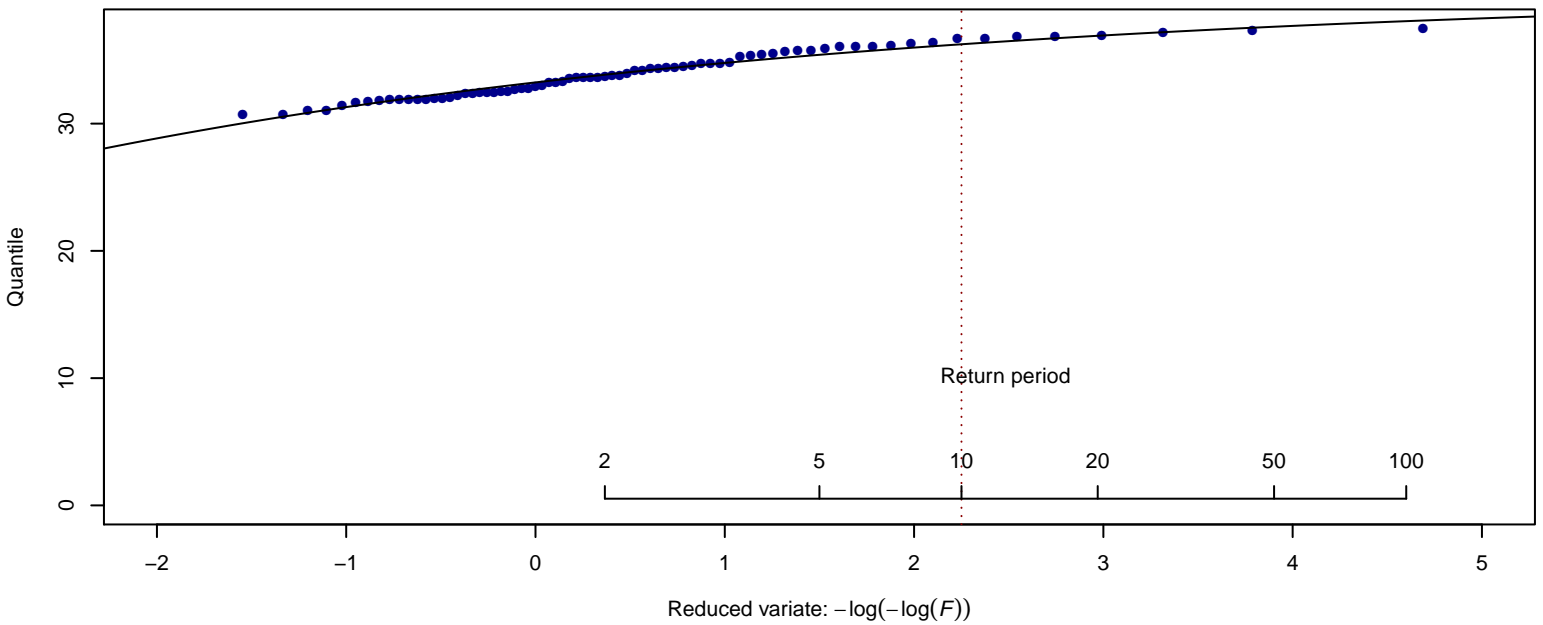

Gringorten (1963)

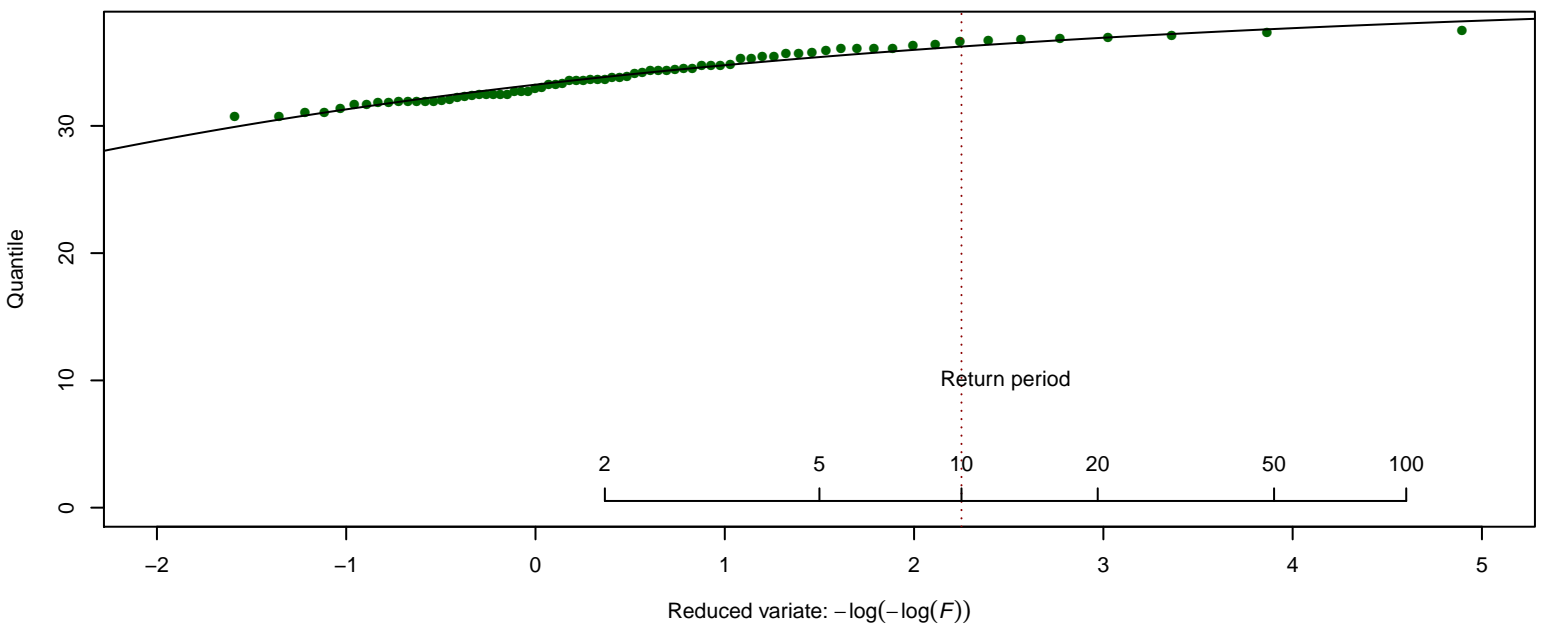

Langen  
Weibull (1939)

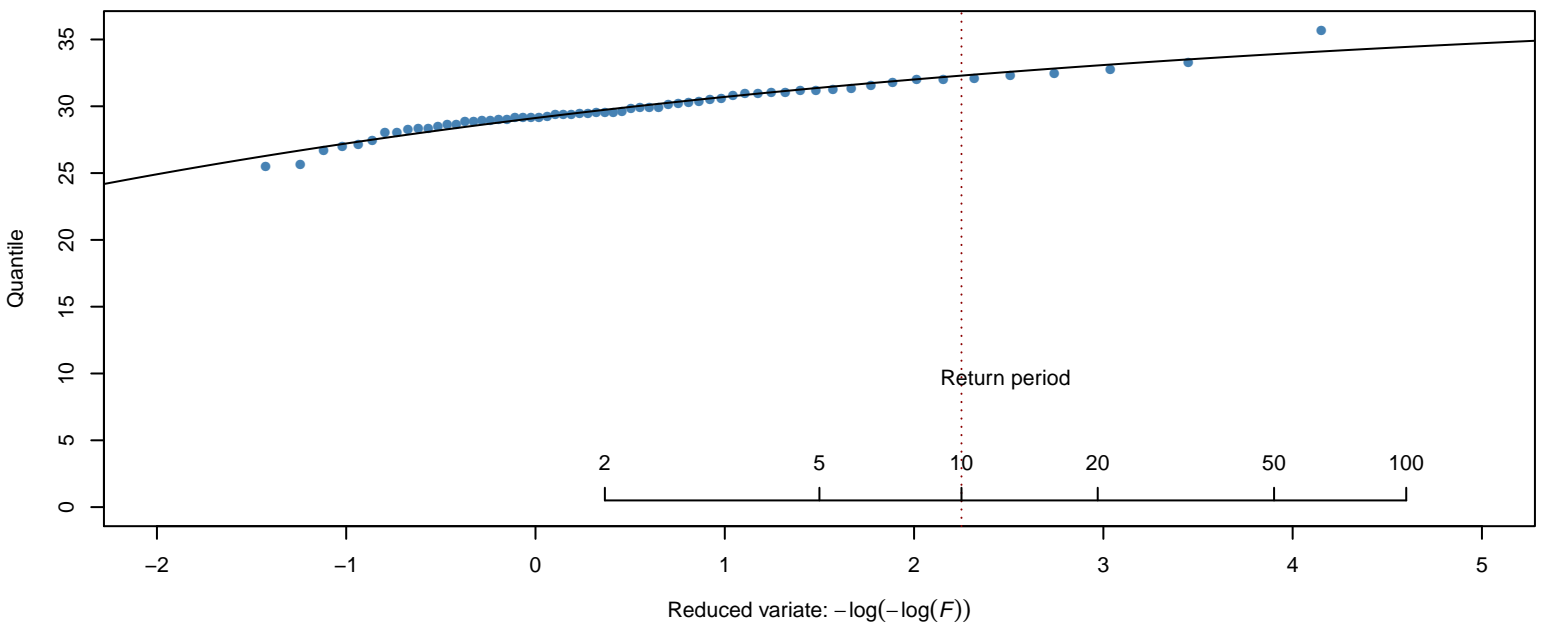

Beard (1943)

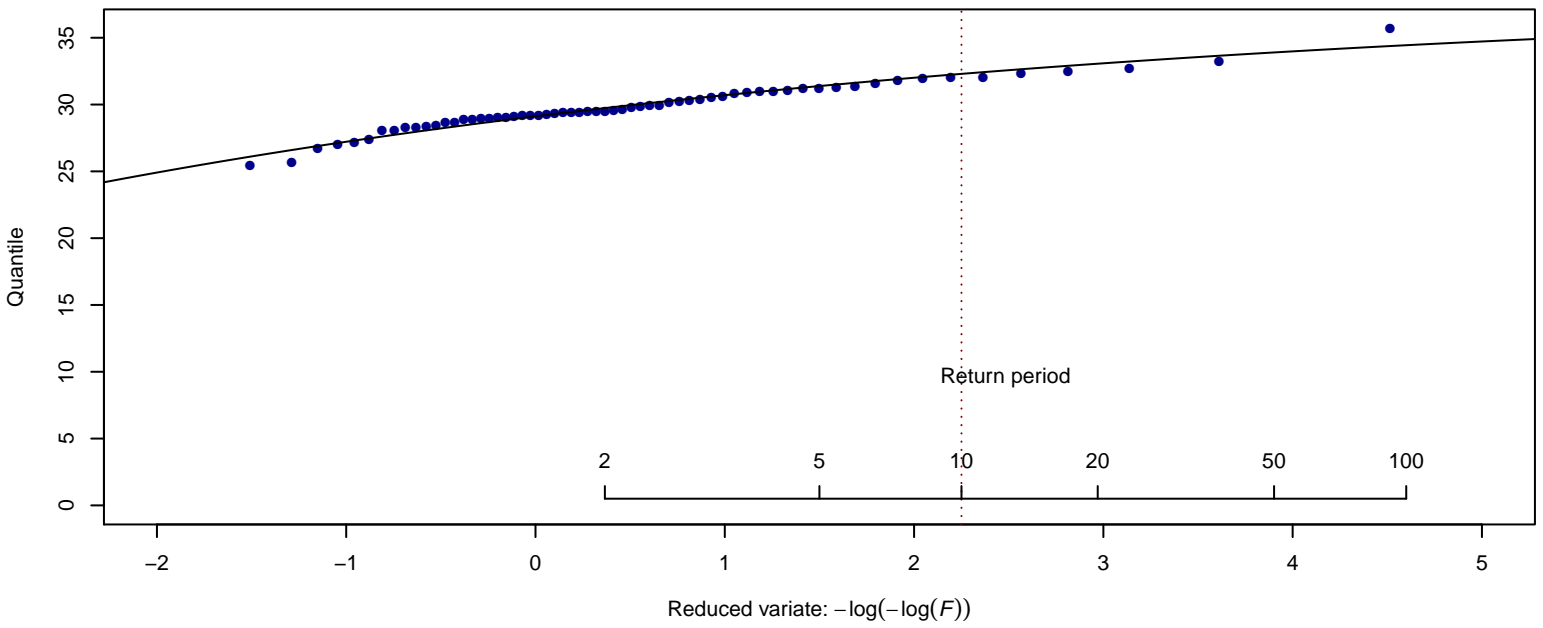

Gringorten (1963)

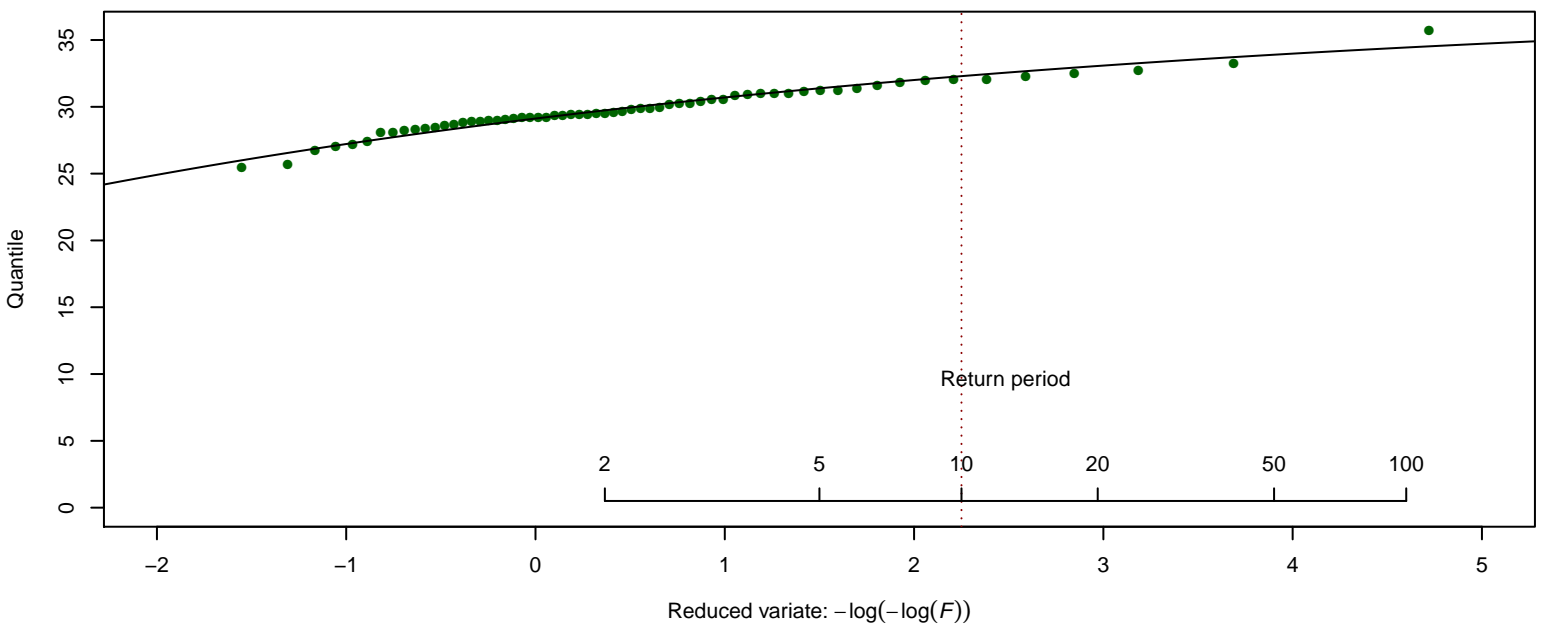

Langenlebar  
Weibull (1939)

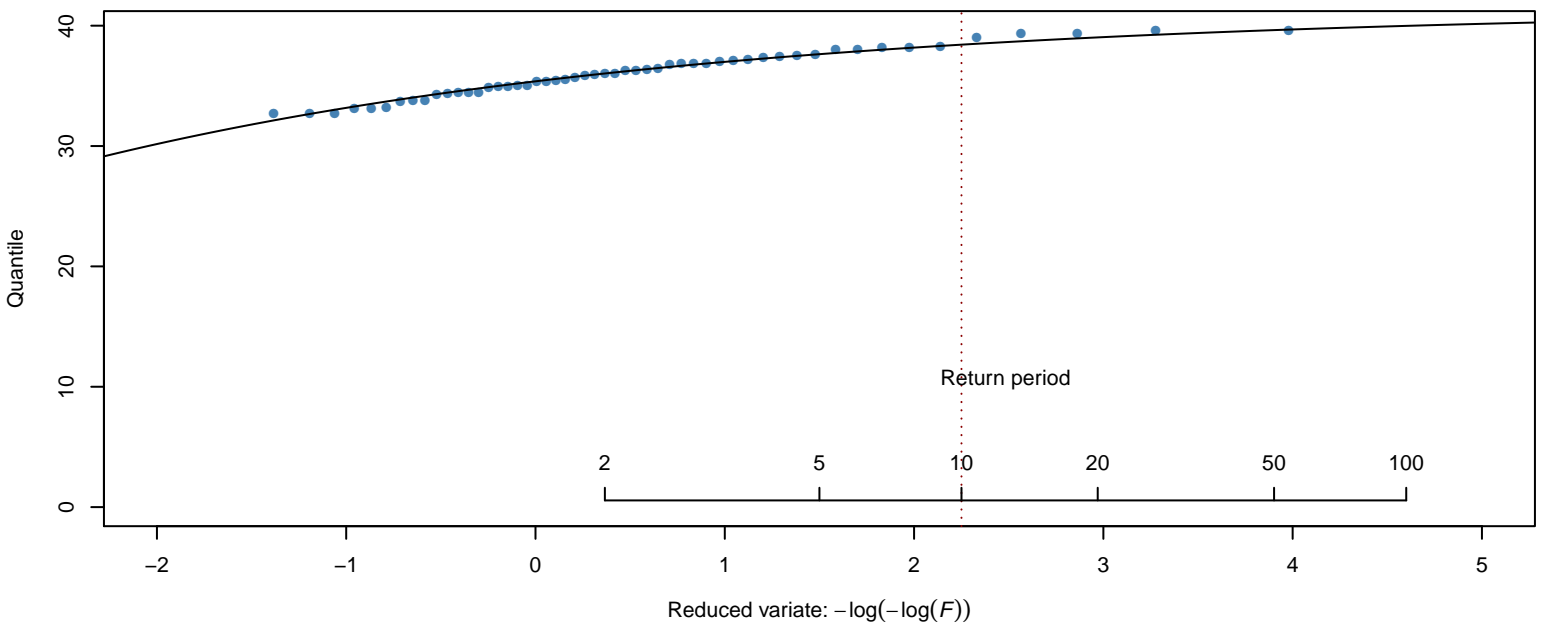

Beard (1943)

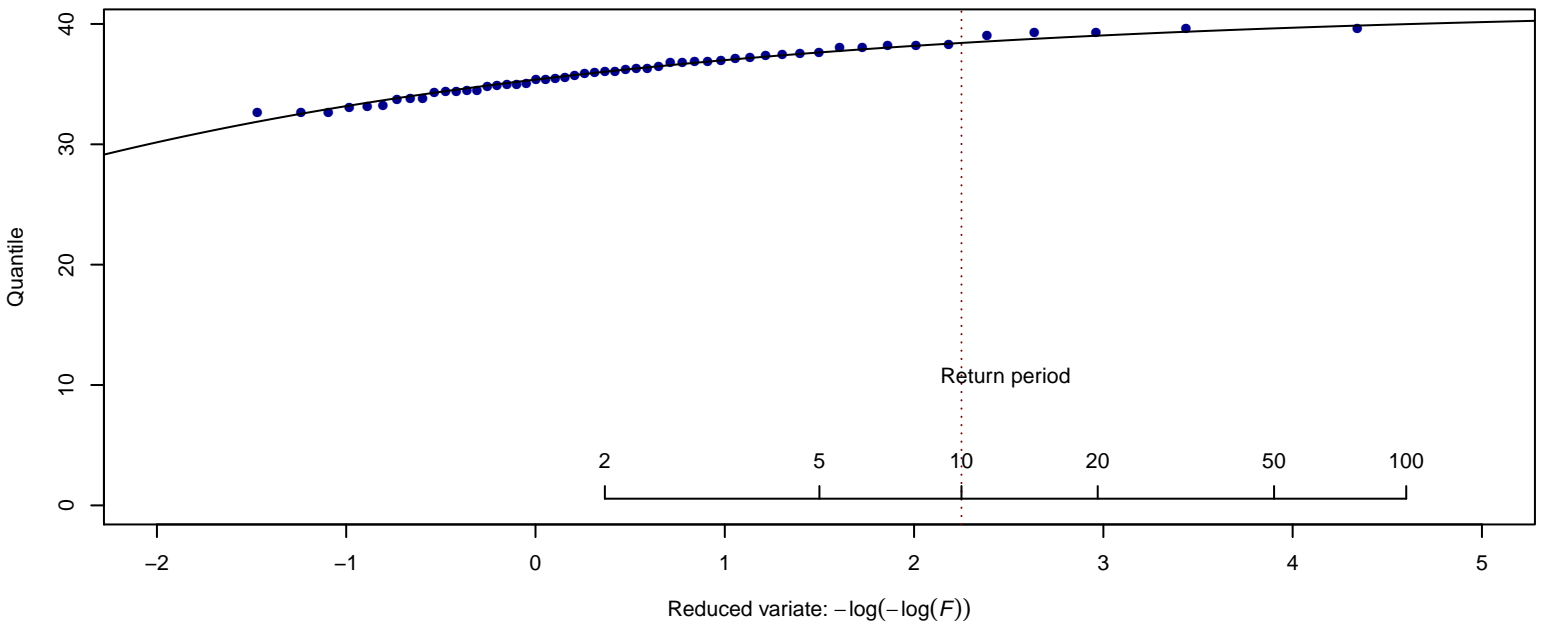

Gringorten (1963)

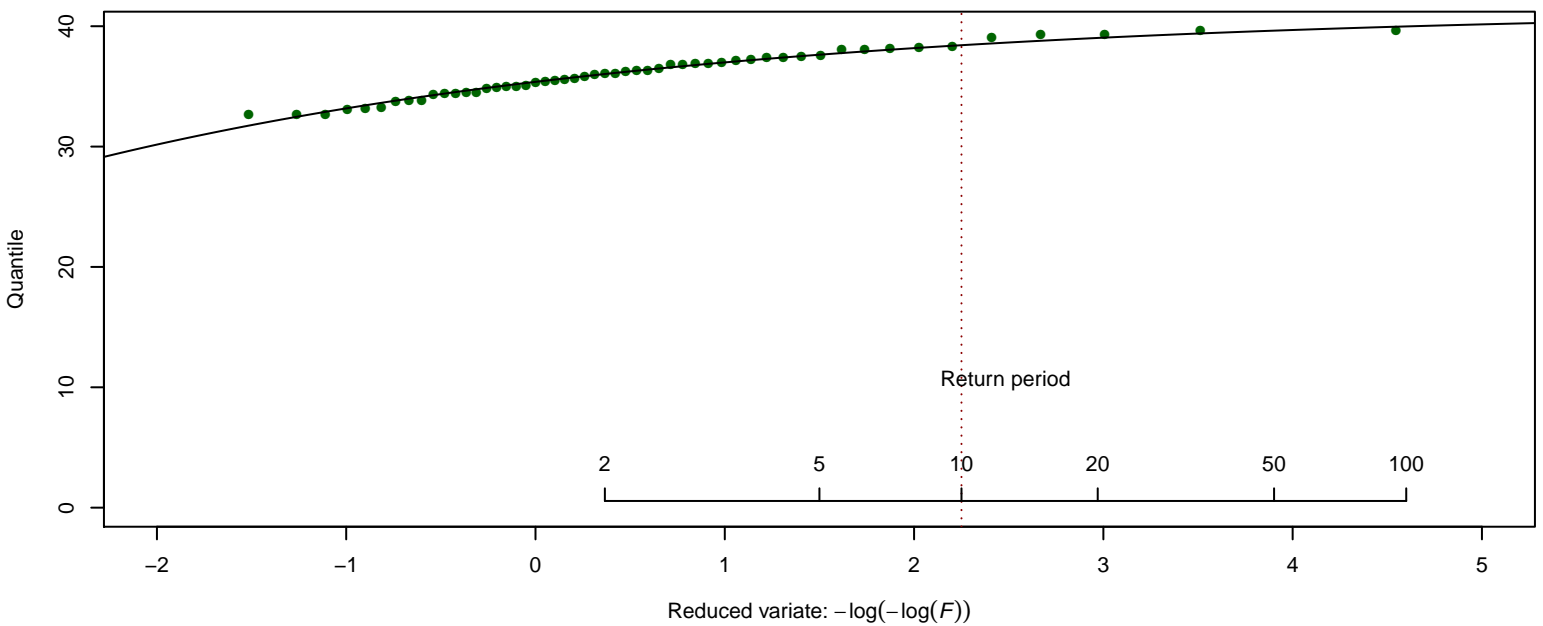

Moenichkirchen  
Weibull (1939)

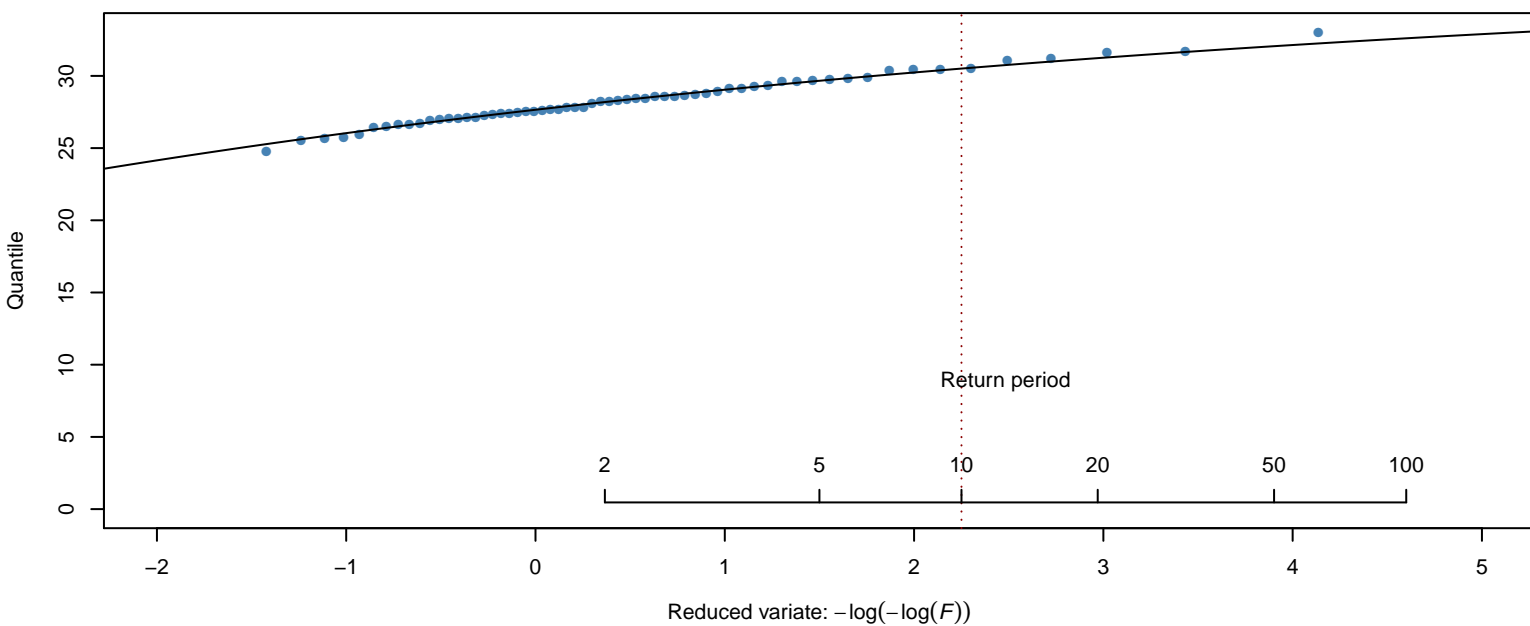

Beard (1943)

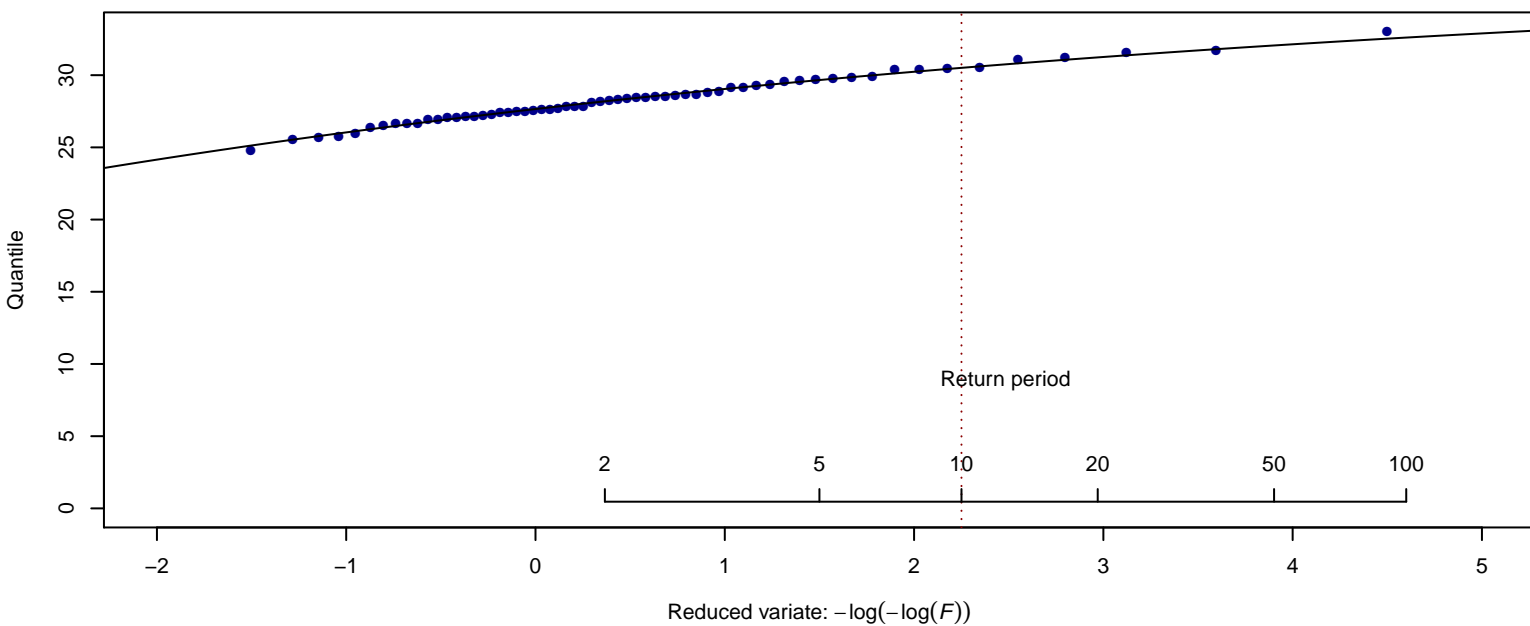

Gringorten (1963)

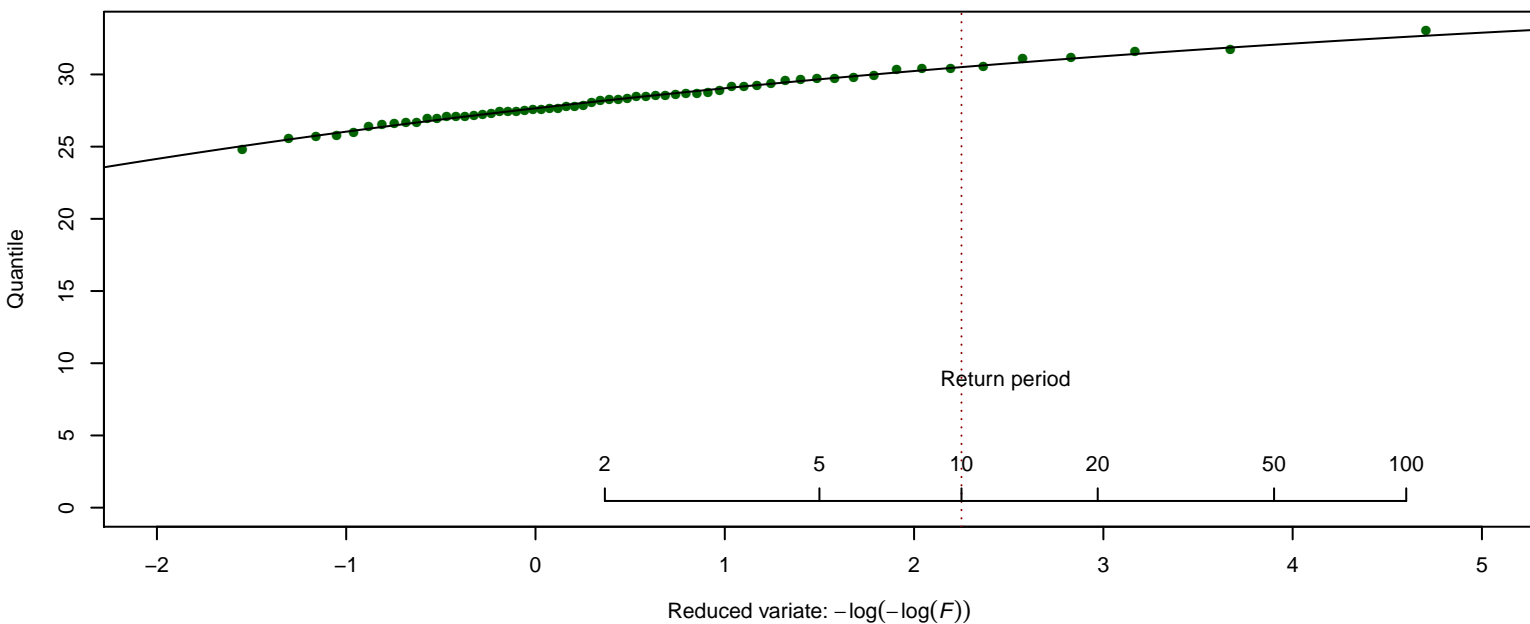



Poertschach  
Weibull (1939)

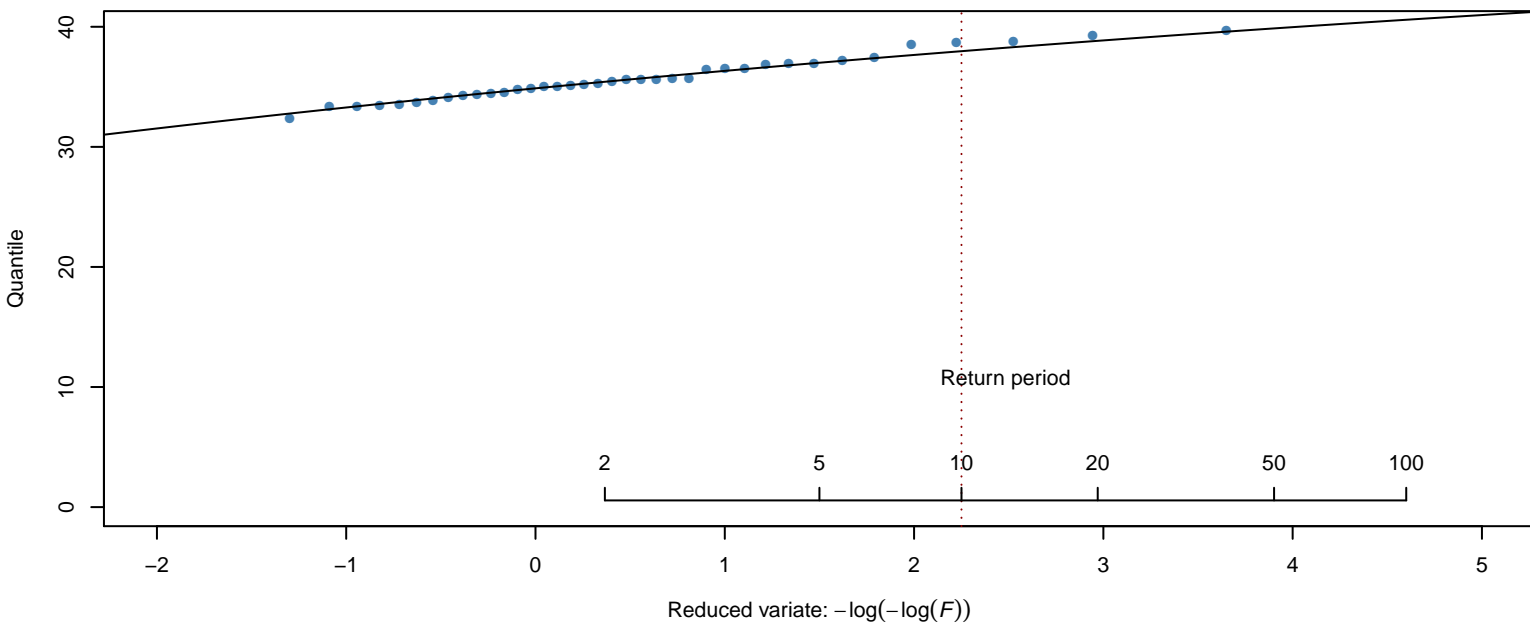

Beard (1943)

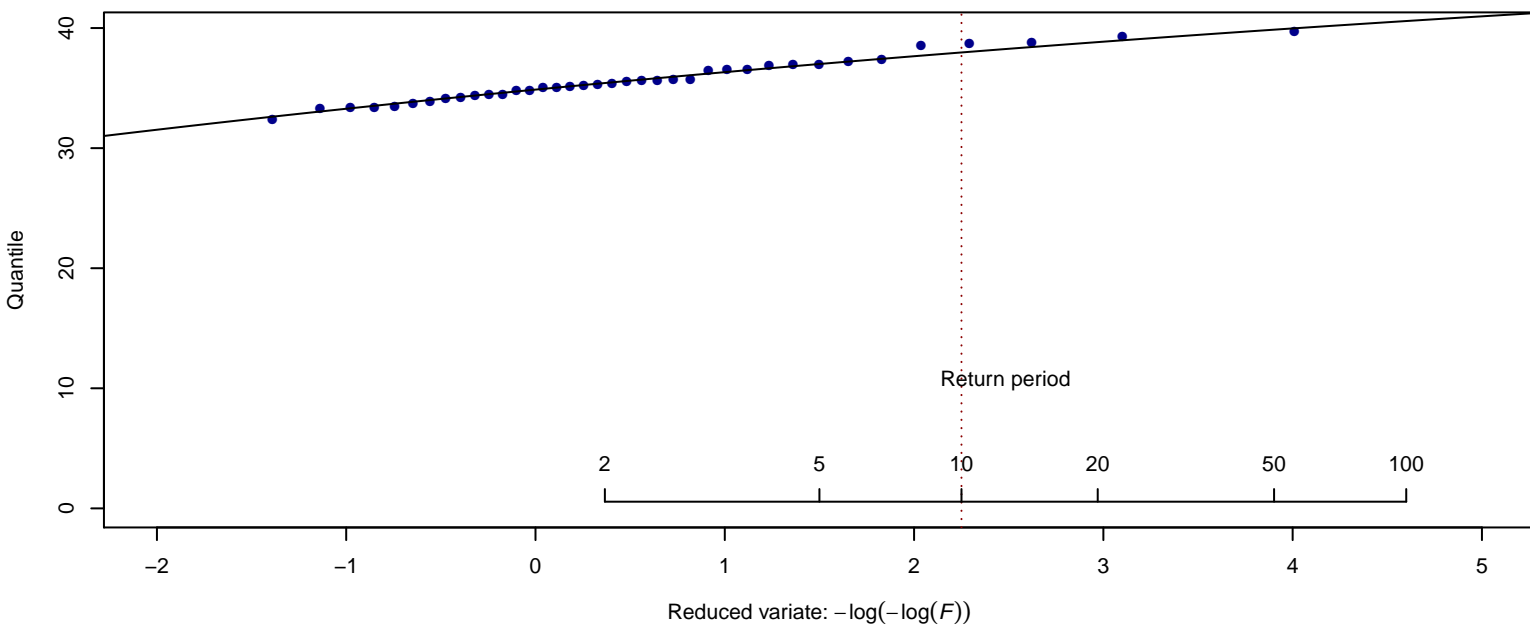

Gringorten (1963)

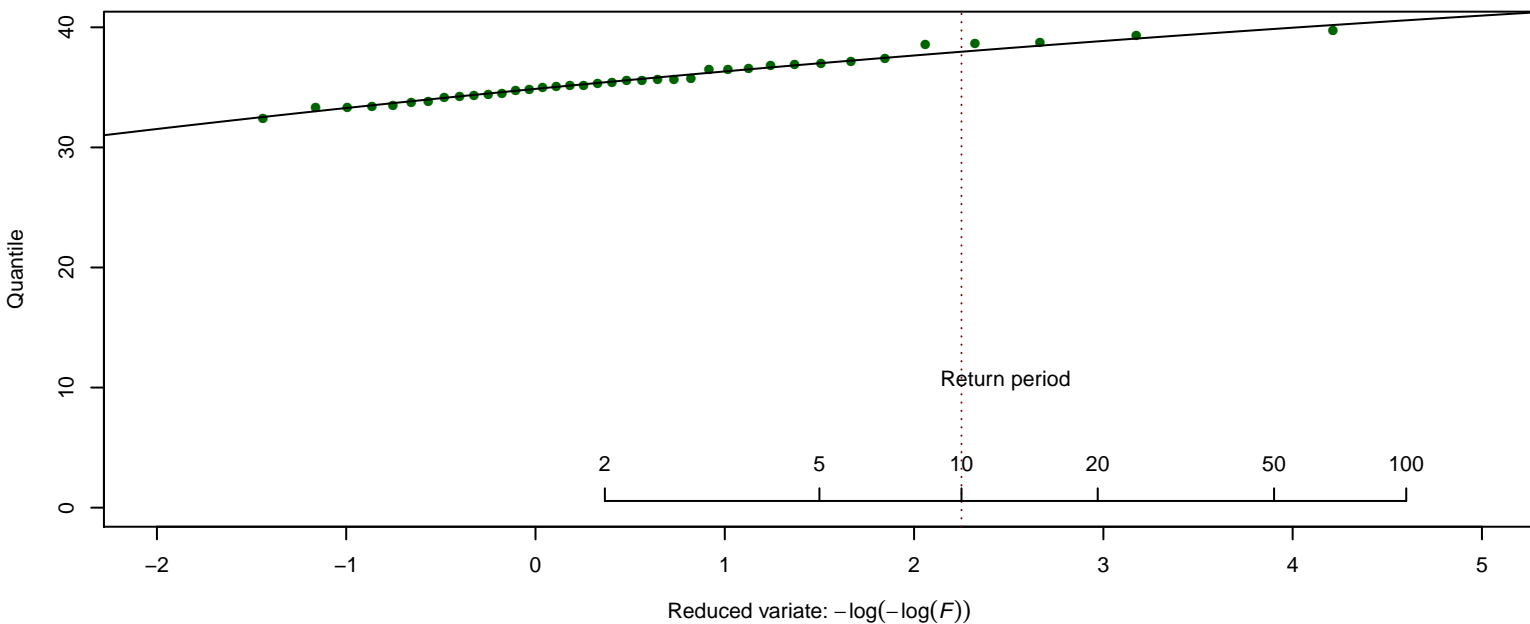

**Preitenegg  
Weibull (1939)**

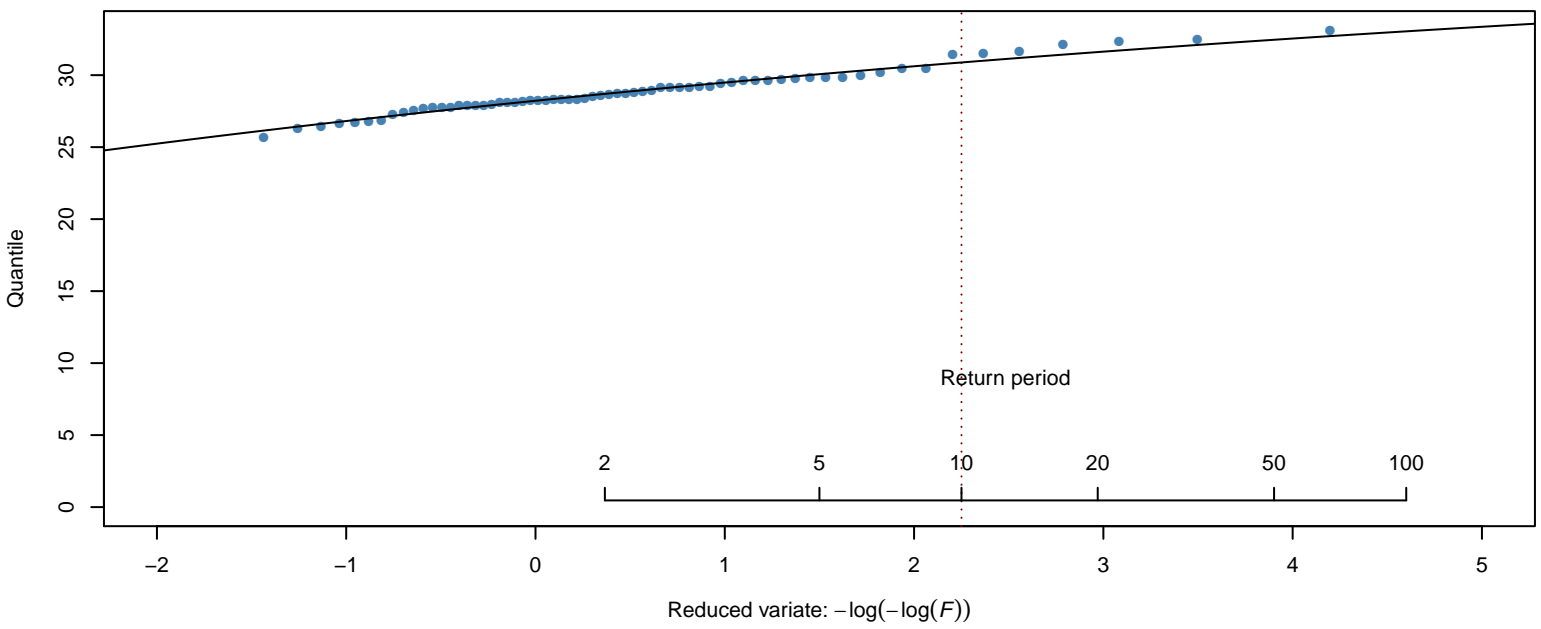

**Beard (1943)**

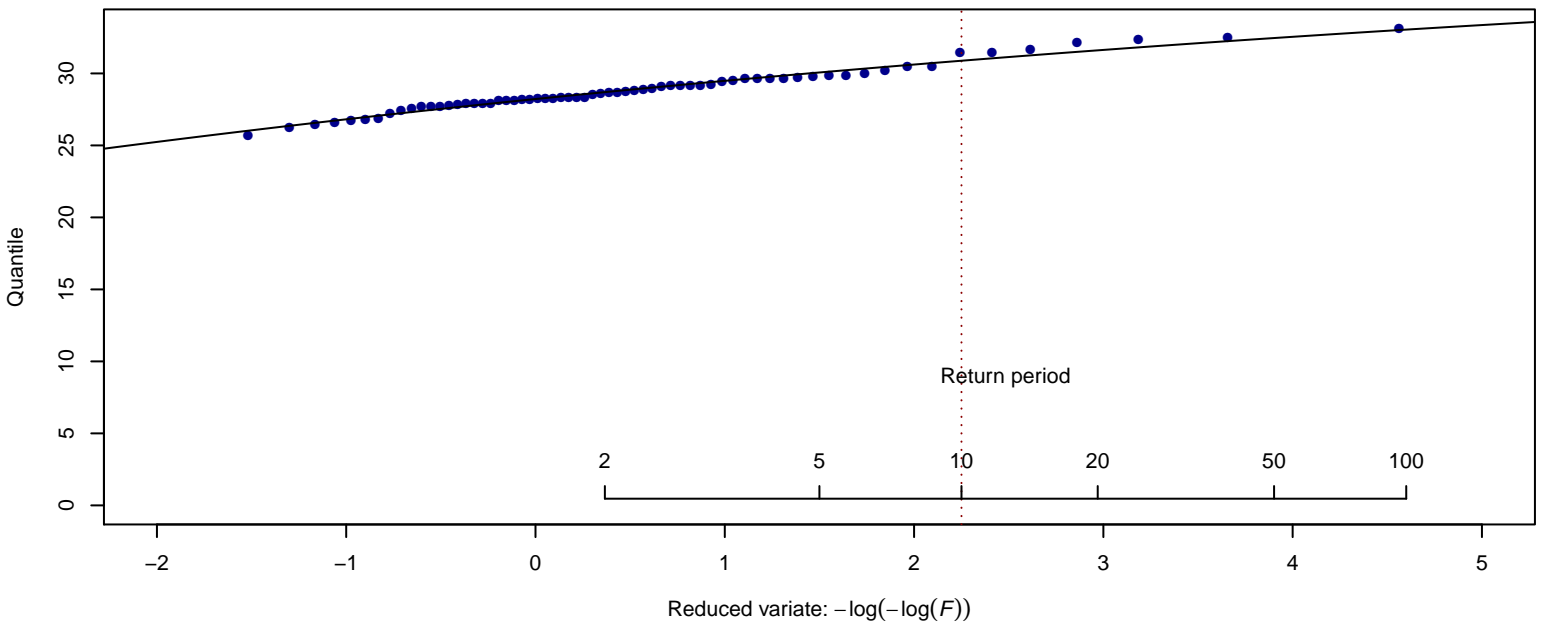

**Gringorten (1963)**

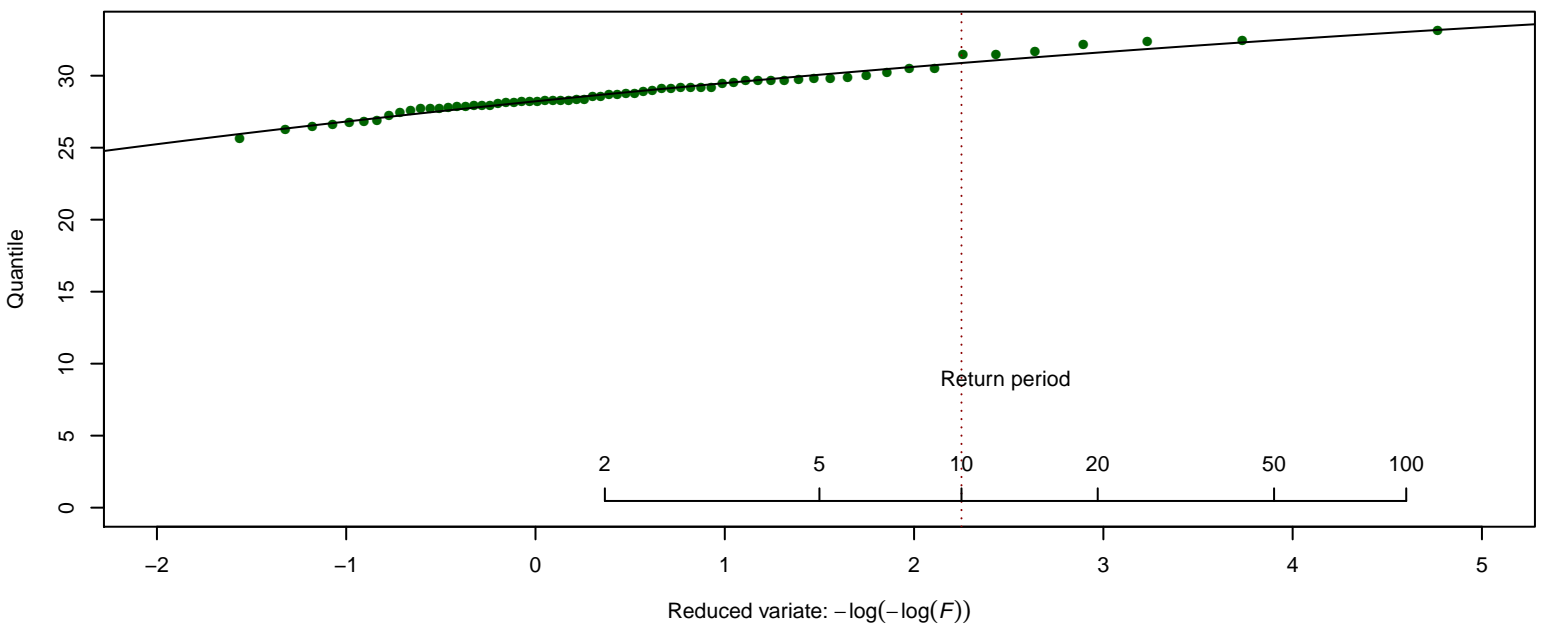

Salzburg  
Weibull (1939)

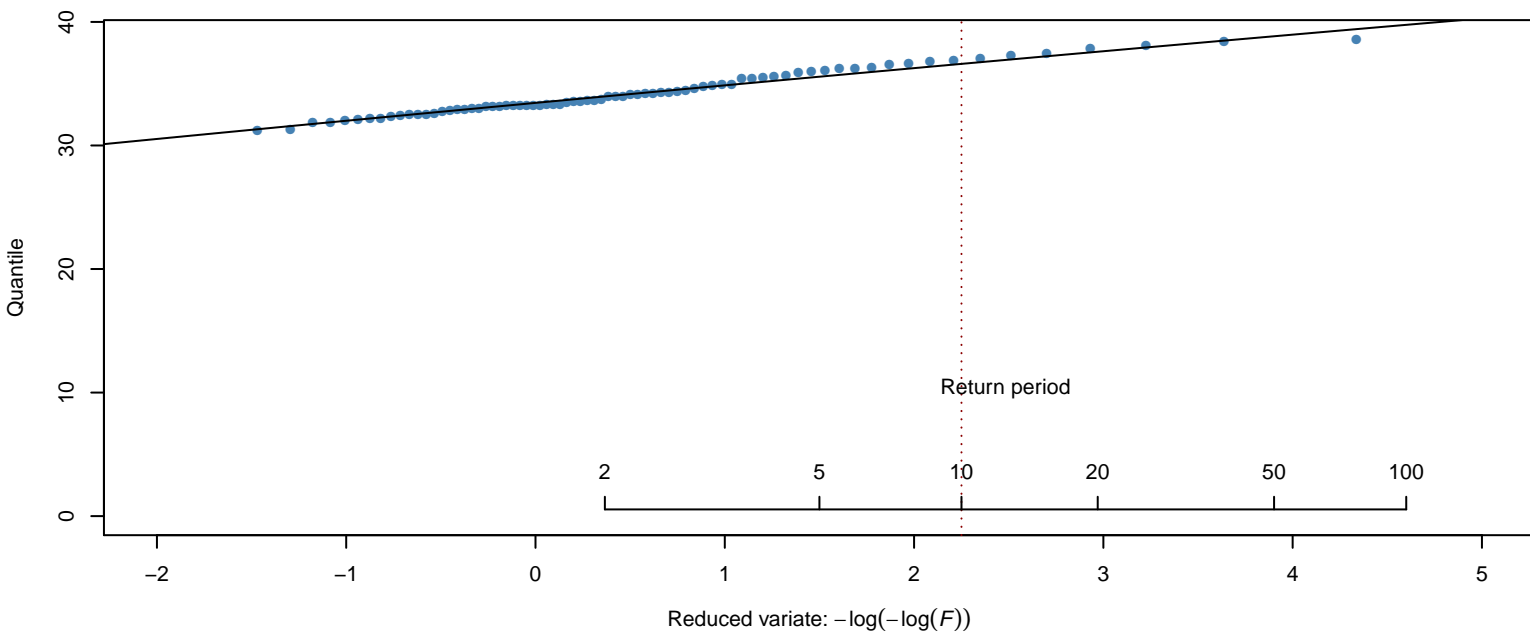

Beard (1943)

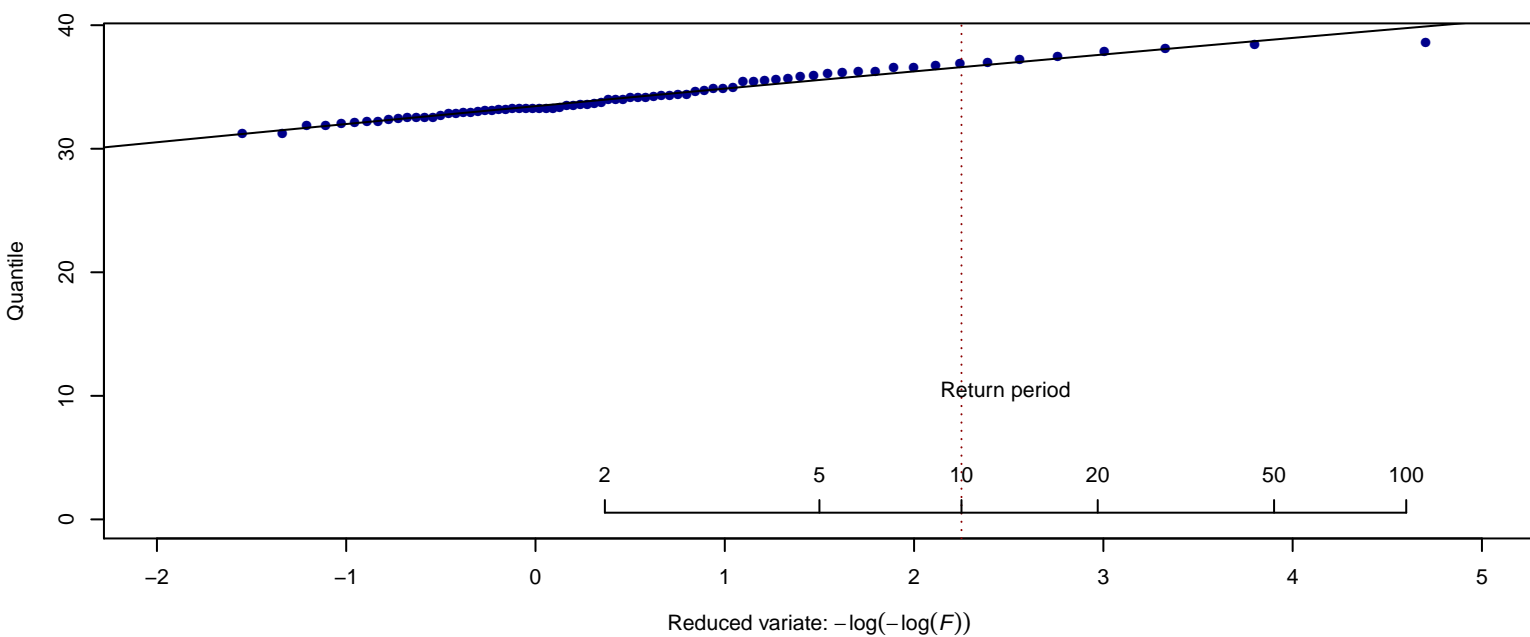

Gringorten (1963)

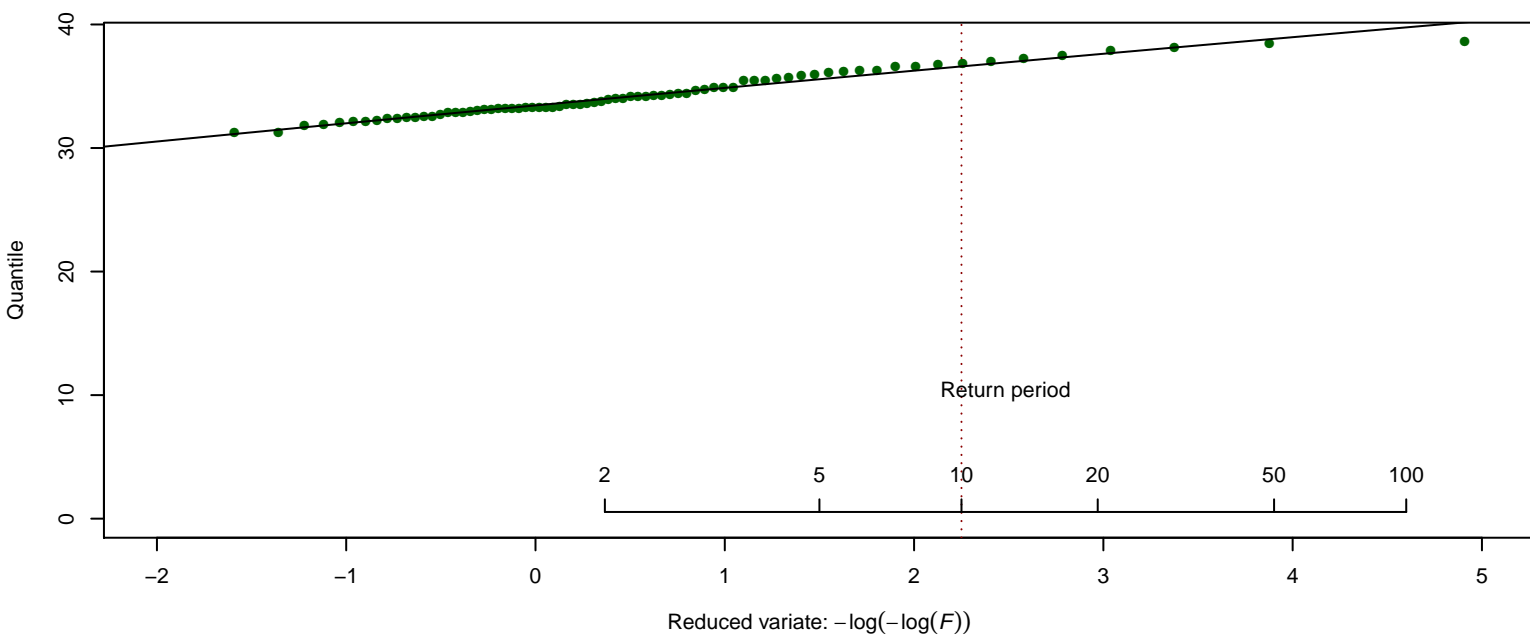

Schwechat  
Weibull (1939)

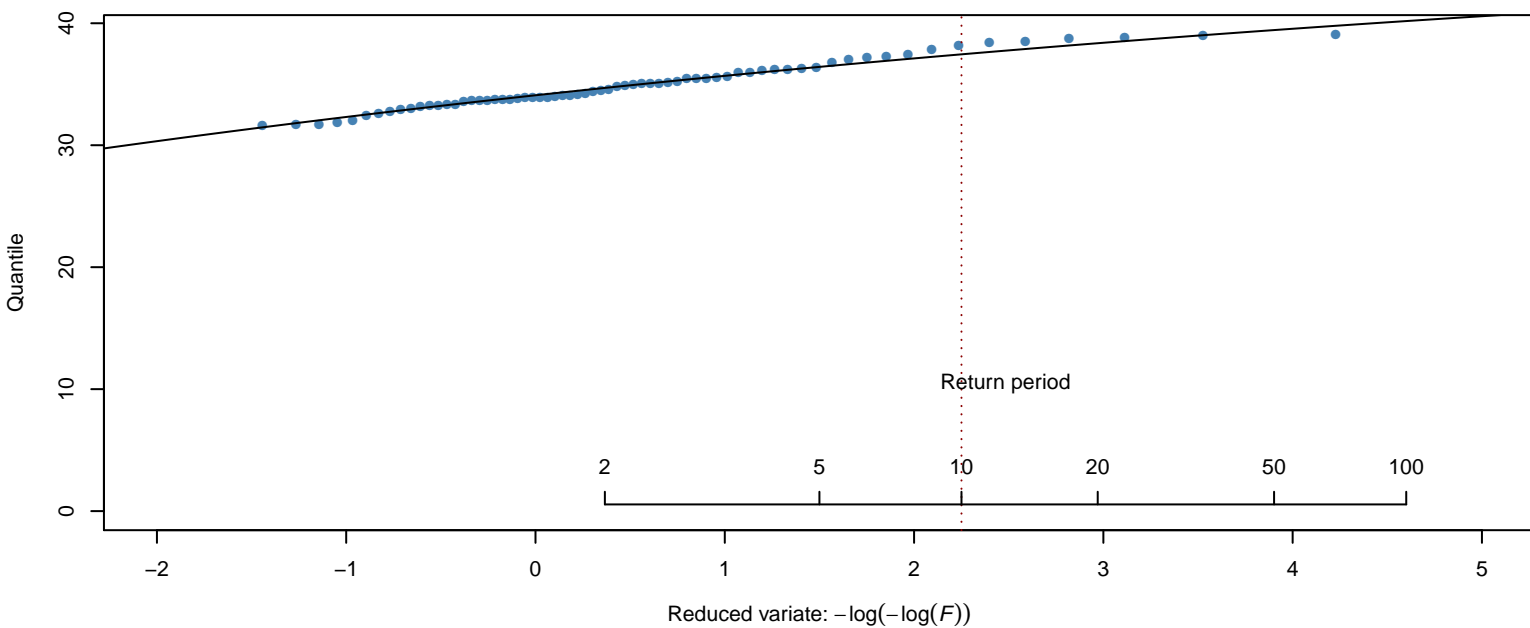

Beard (1943)

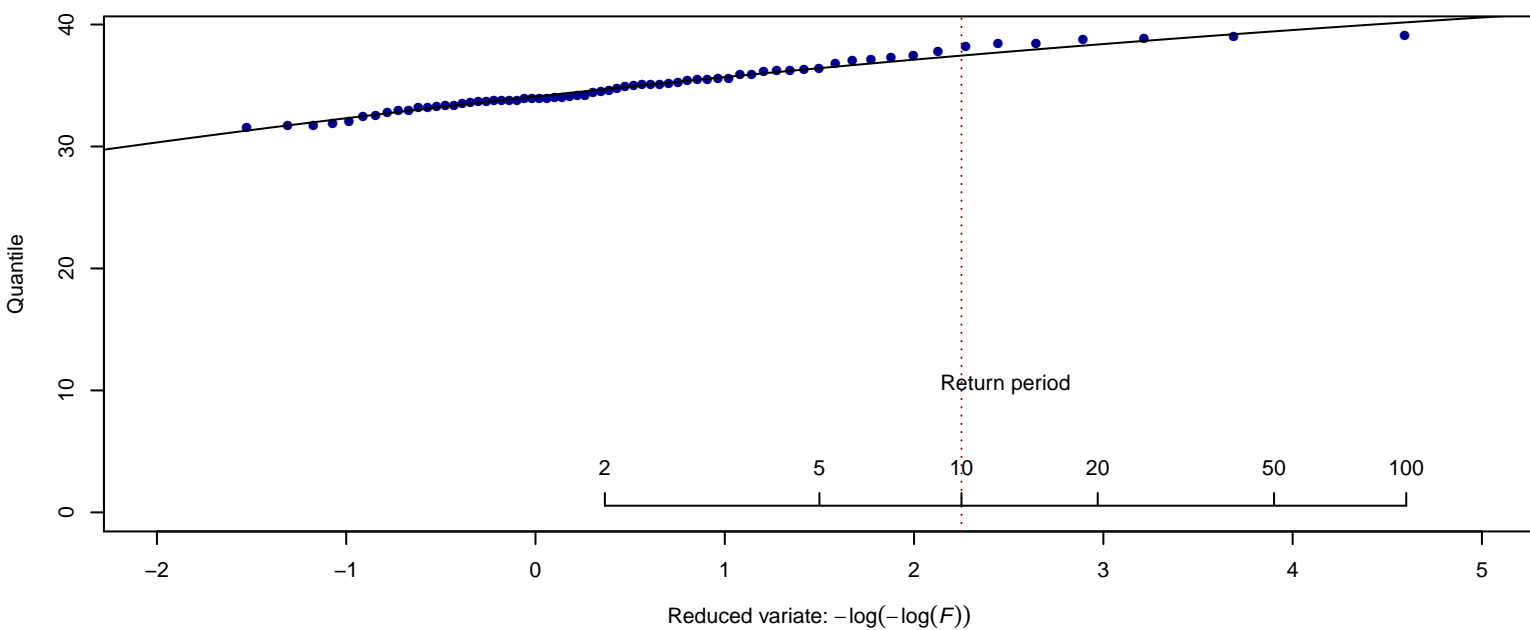

Gringorten (1963)

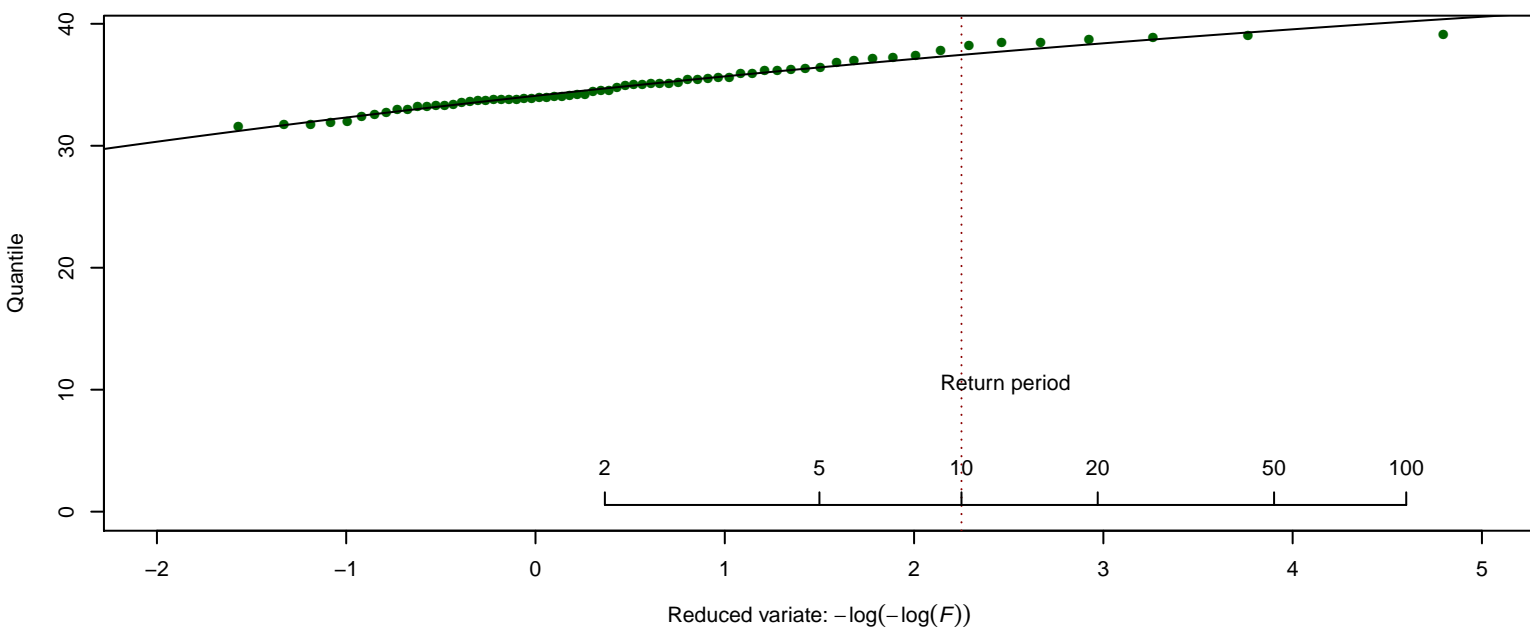

**Semmering  
Weibull (1939)**

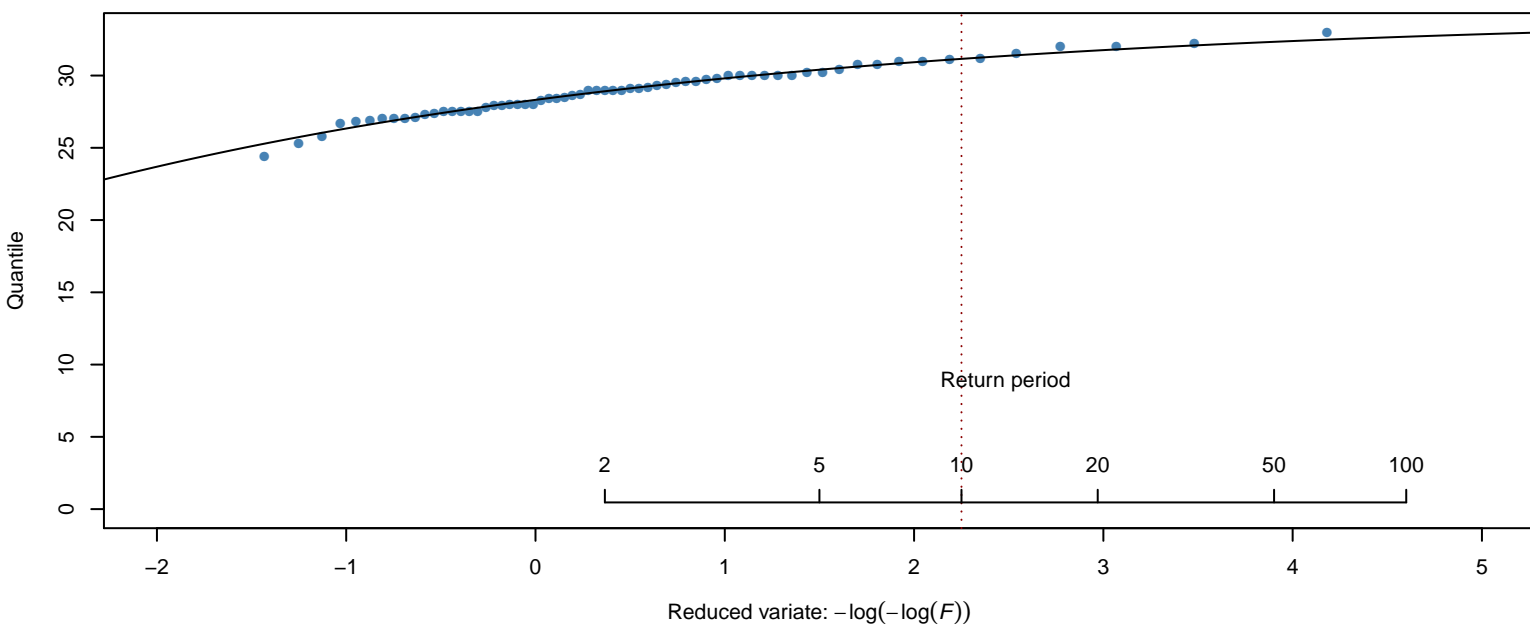

**Beard (1943)**

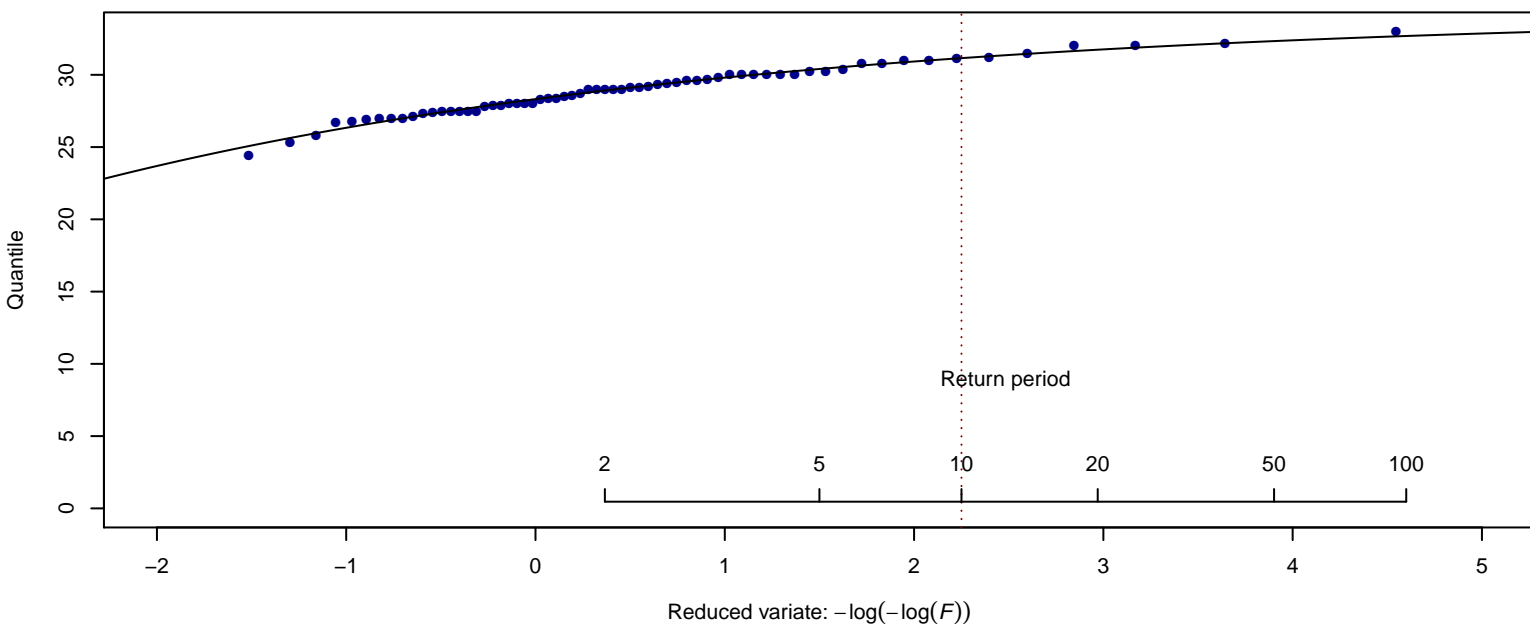

**Gringorten (1963)**

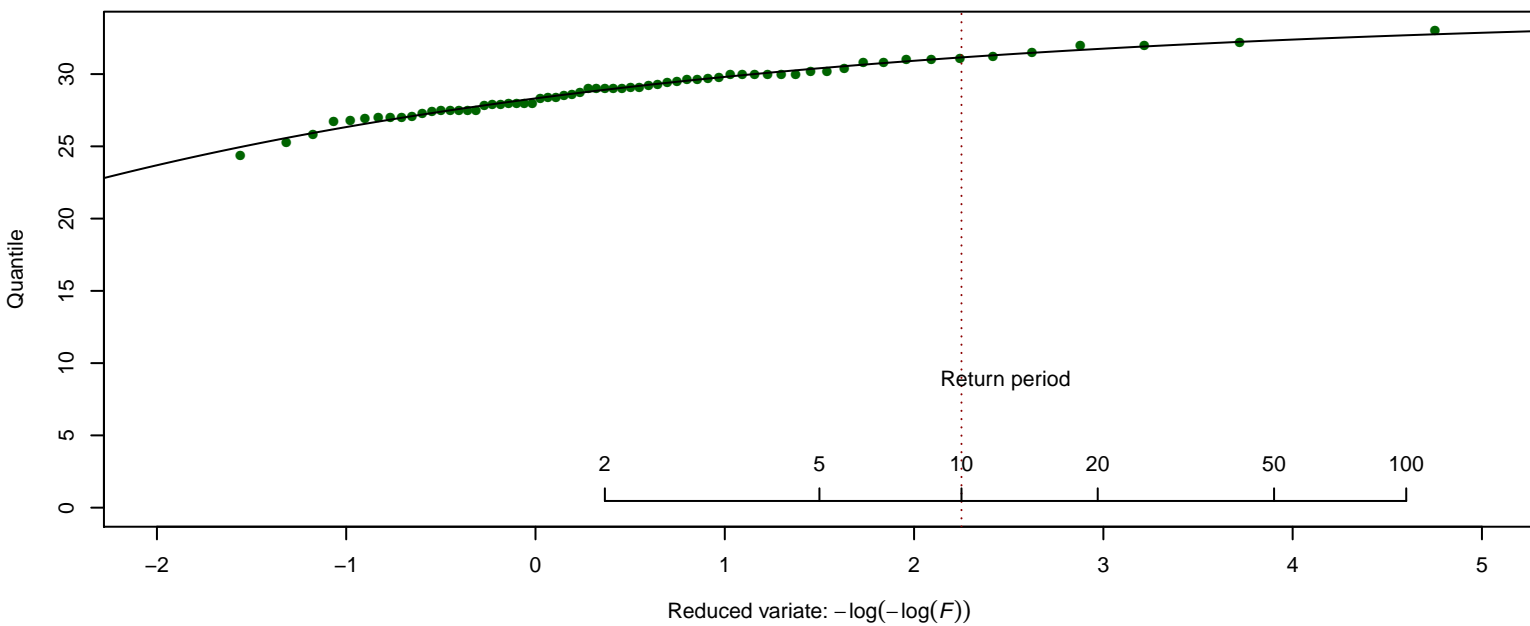

Spittal  
Weibull (1939)

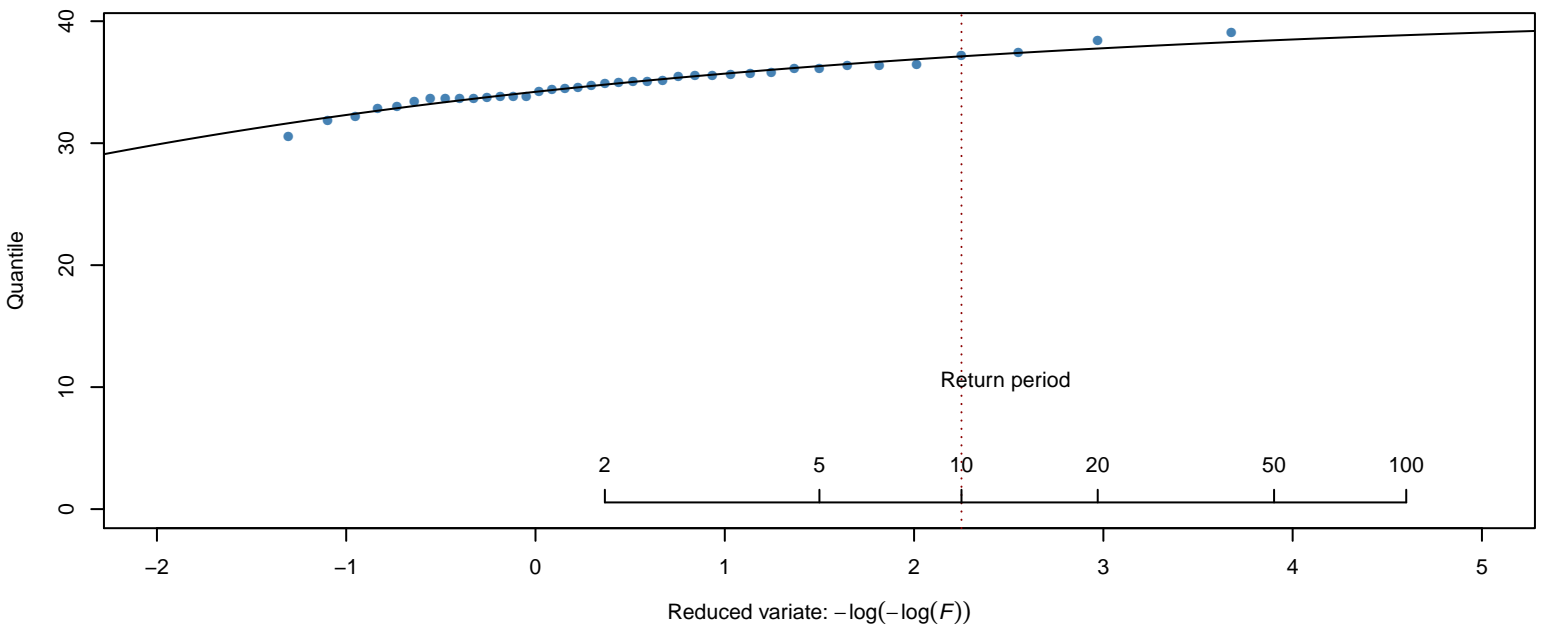

Beard (1943)

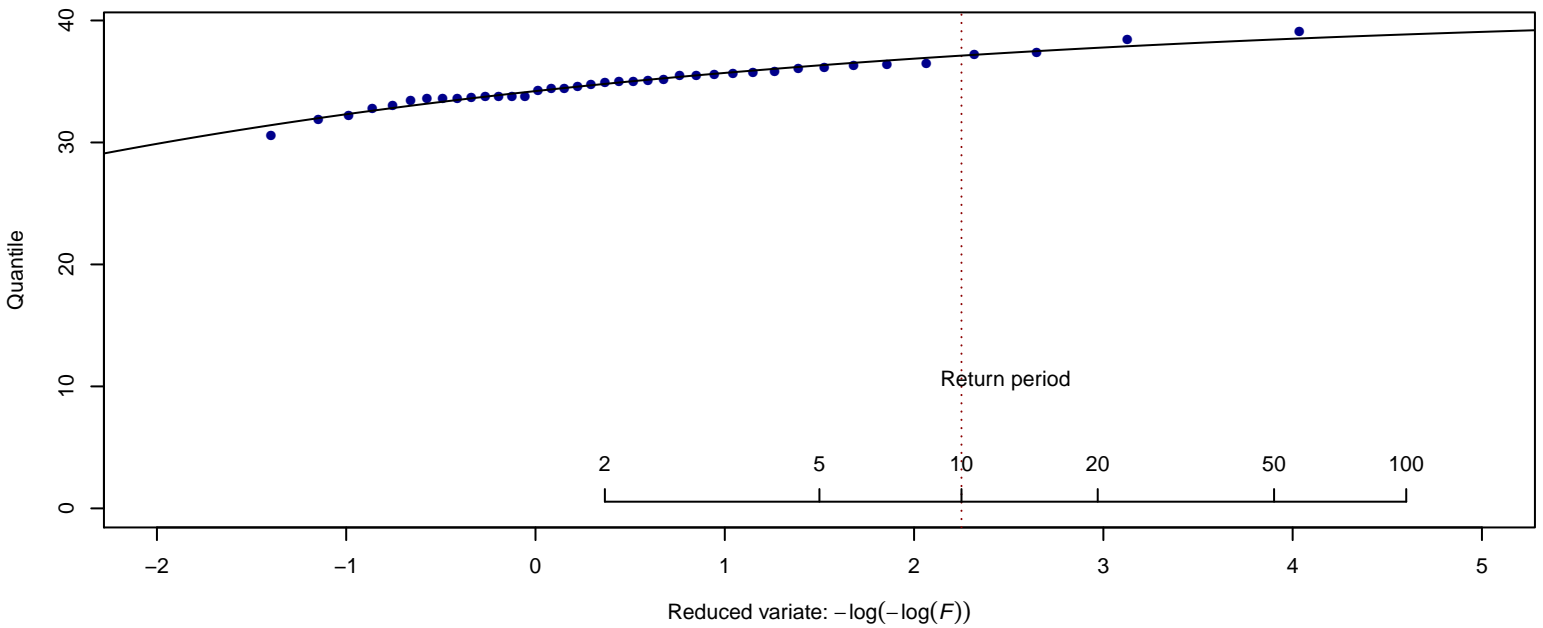

Gringorten (1963)

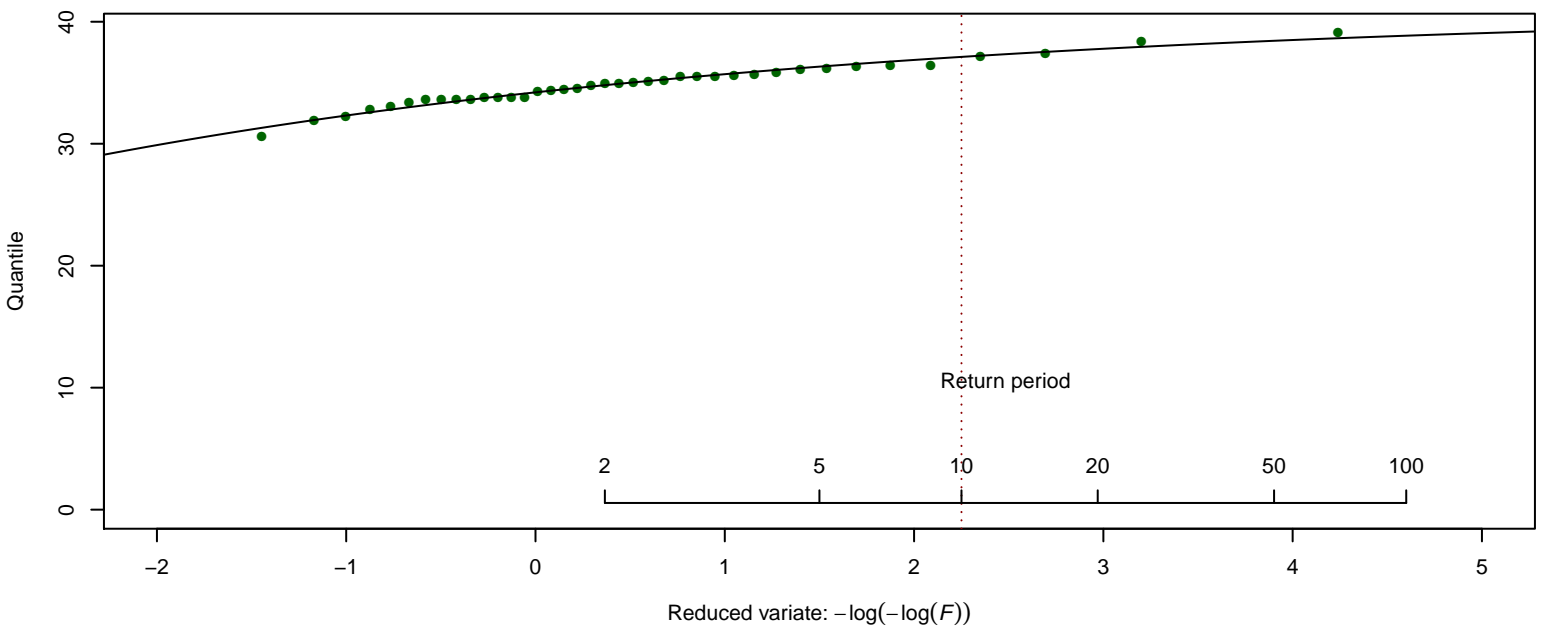

St.Michael  
Weibull (1939)

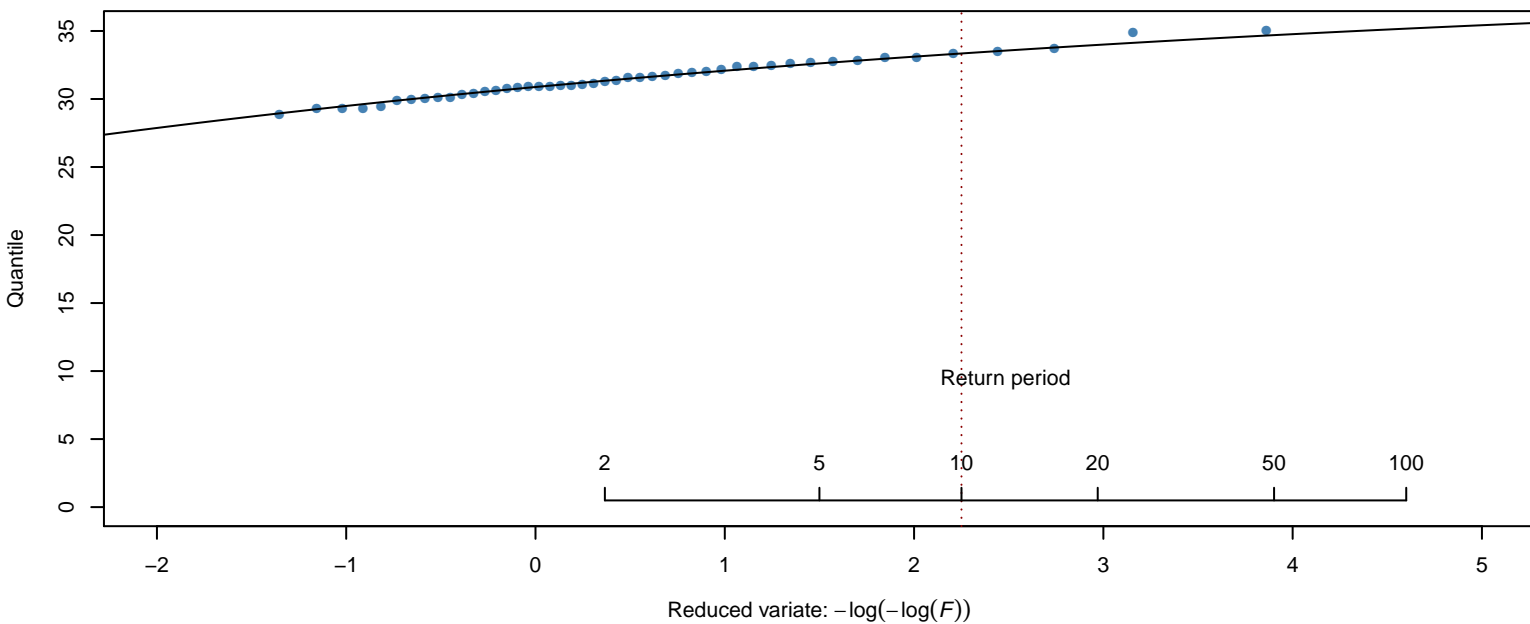

Beard (1943)

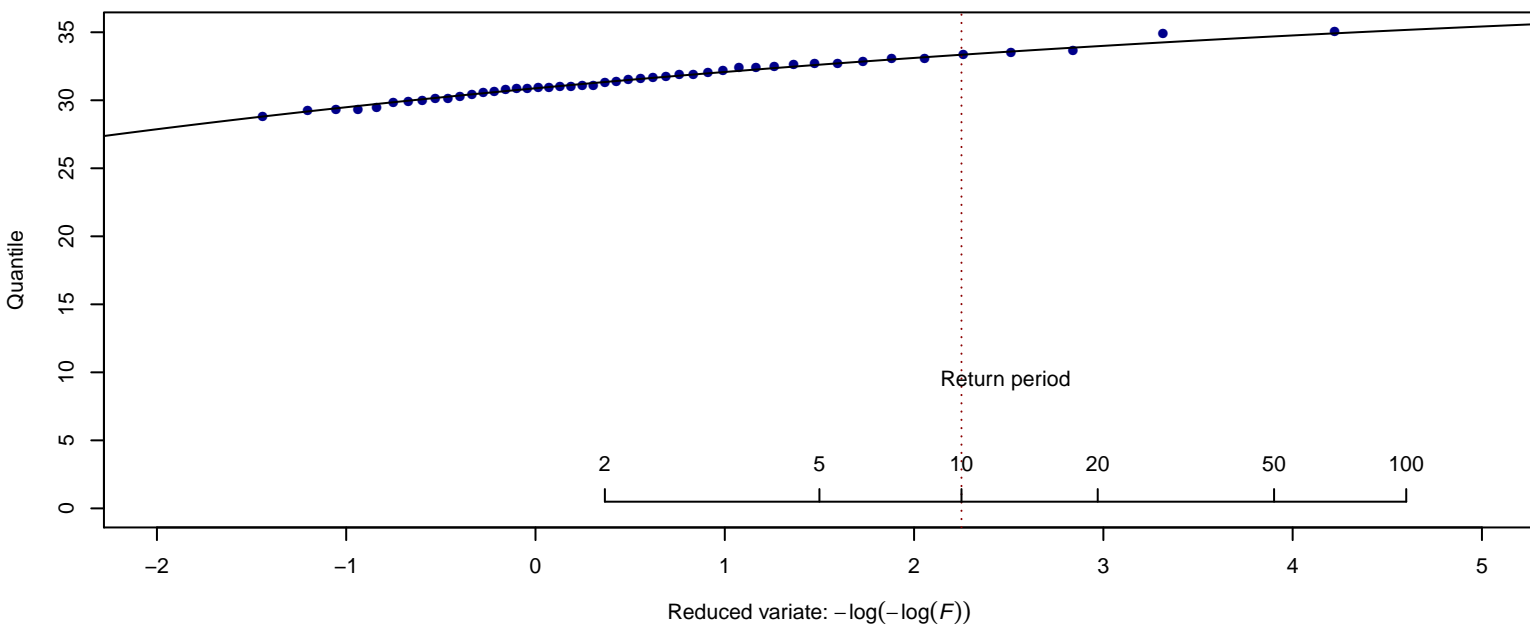

Gringorten (1963)

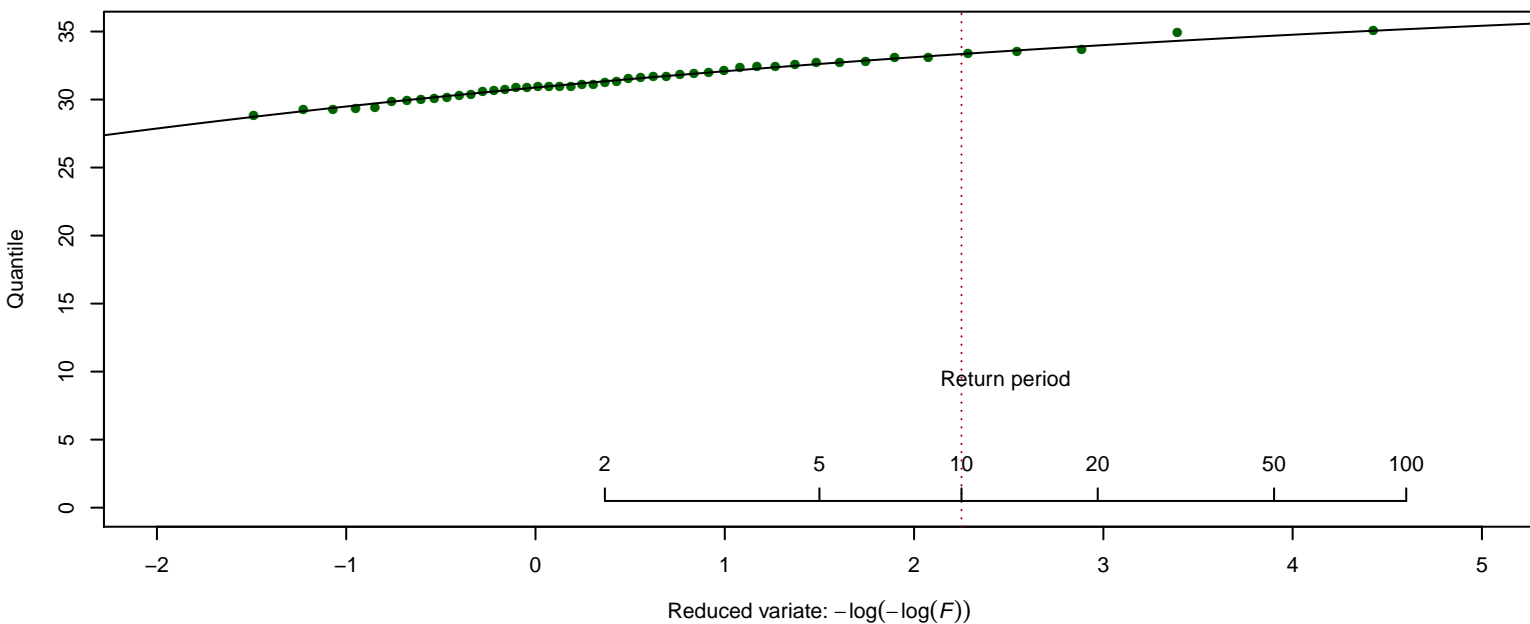

Windischgarsten  
Weibull (1939)

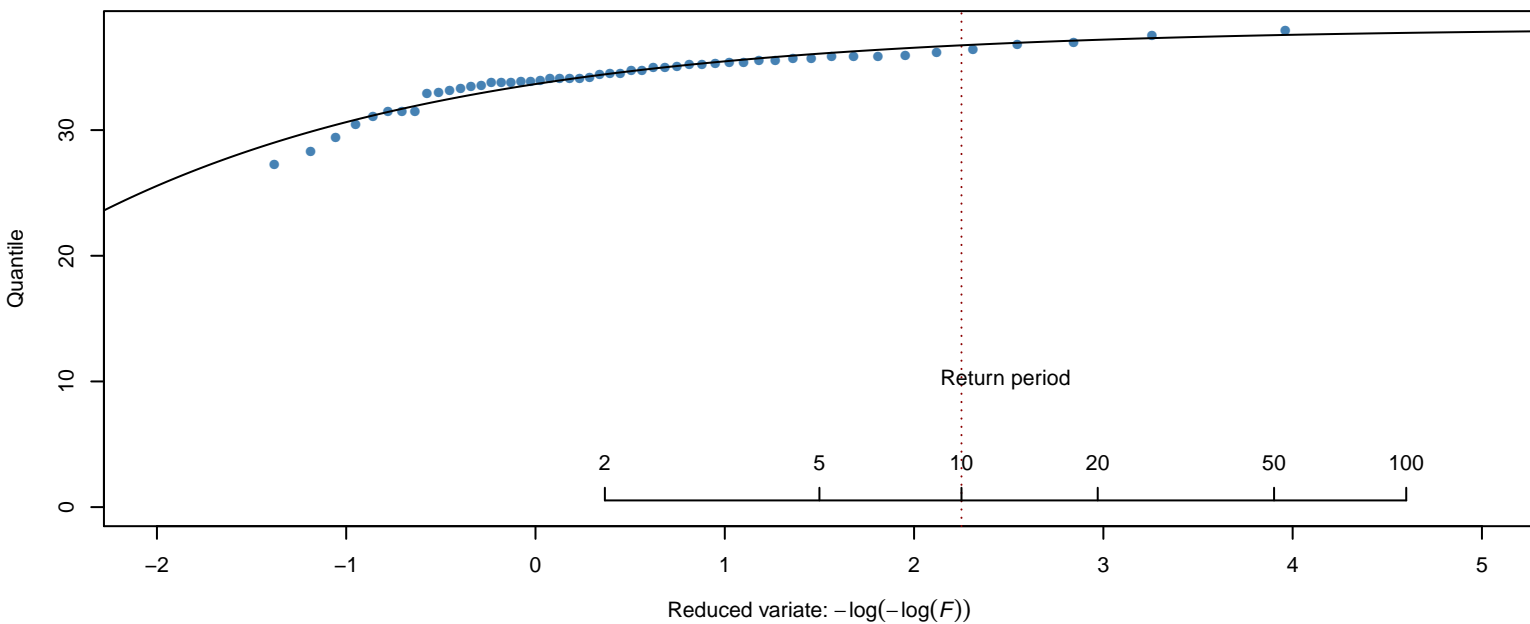

Beard (1943)

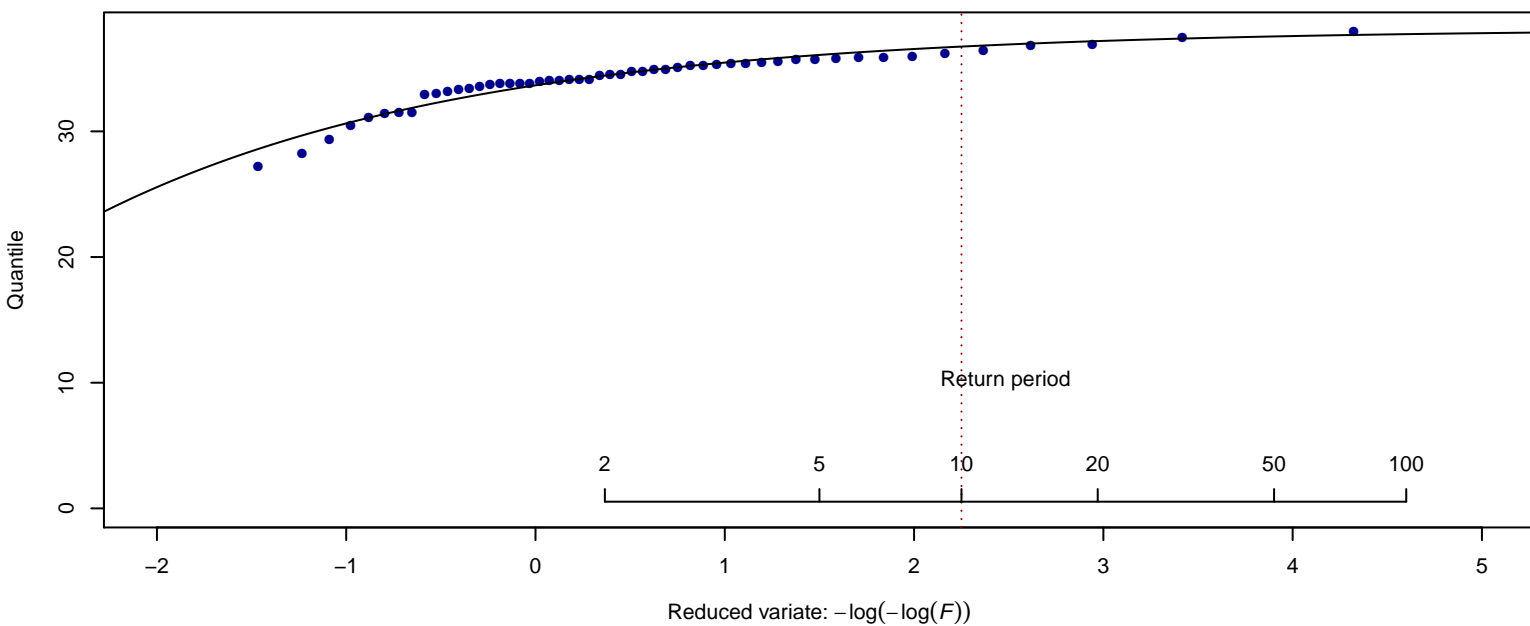

Gringorten (1963)

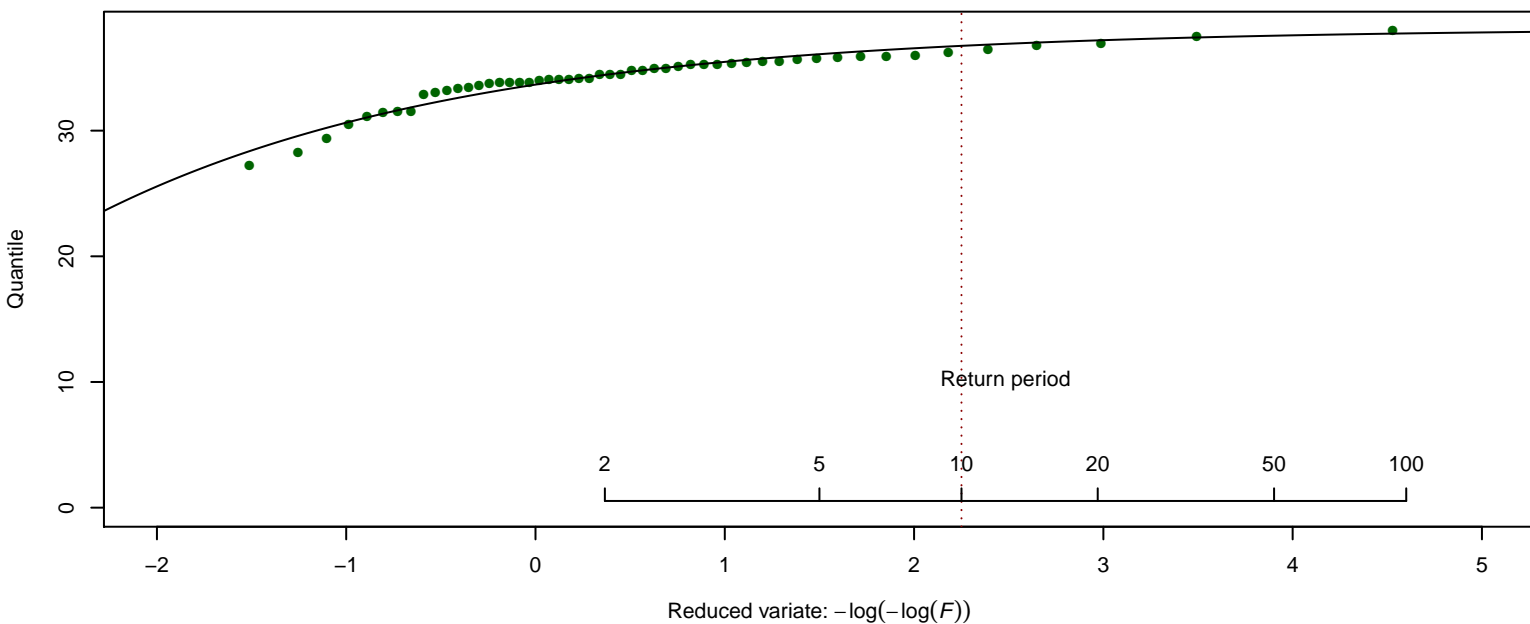



Zeltweg  
Weibull (1939)

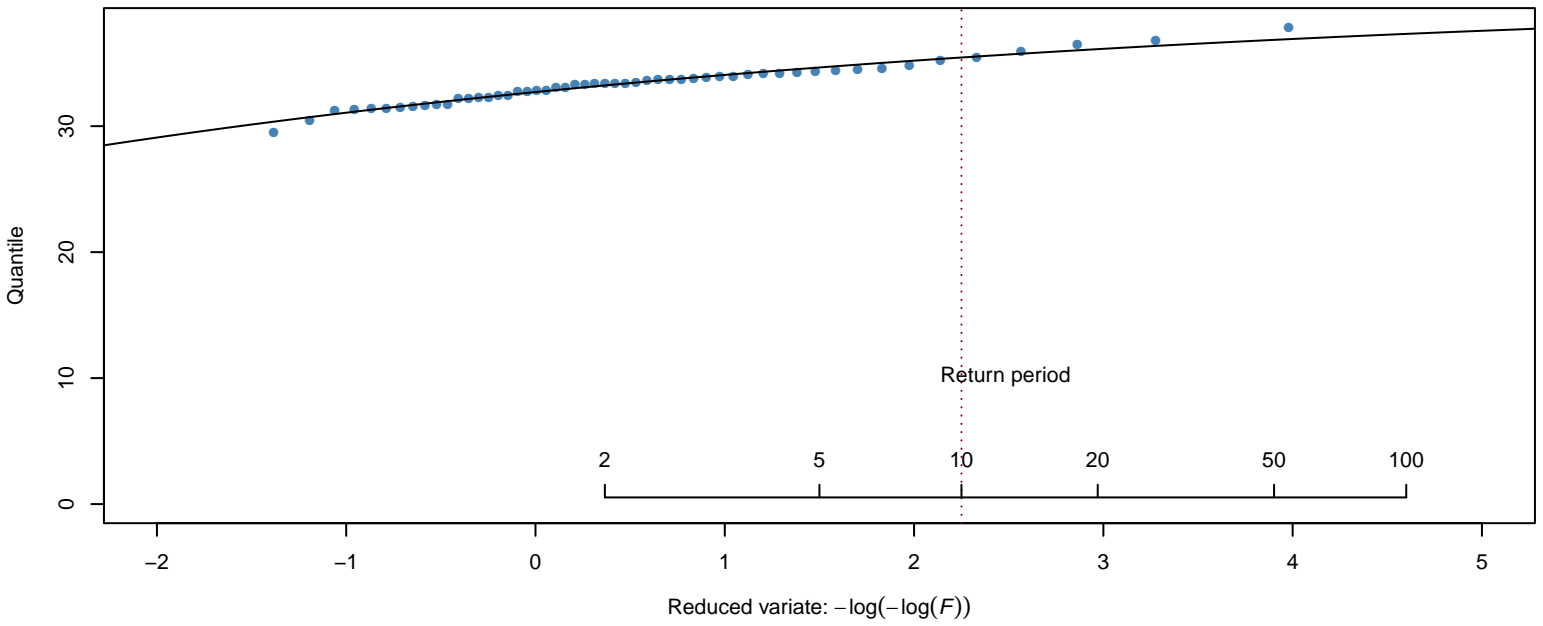

Beard (1943)

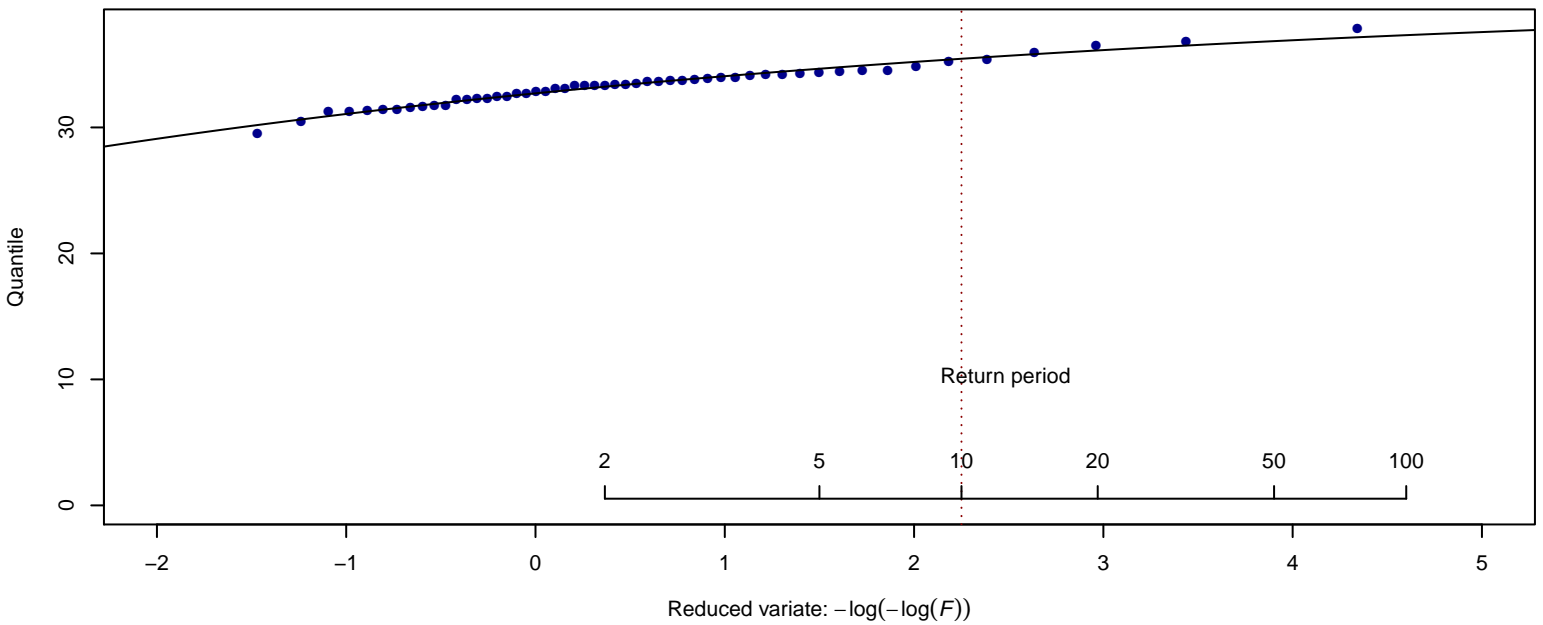

Gringorten (1963)

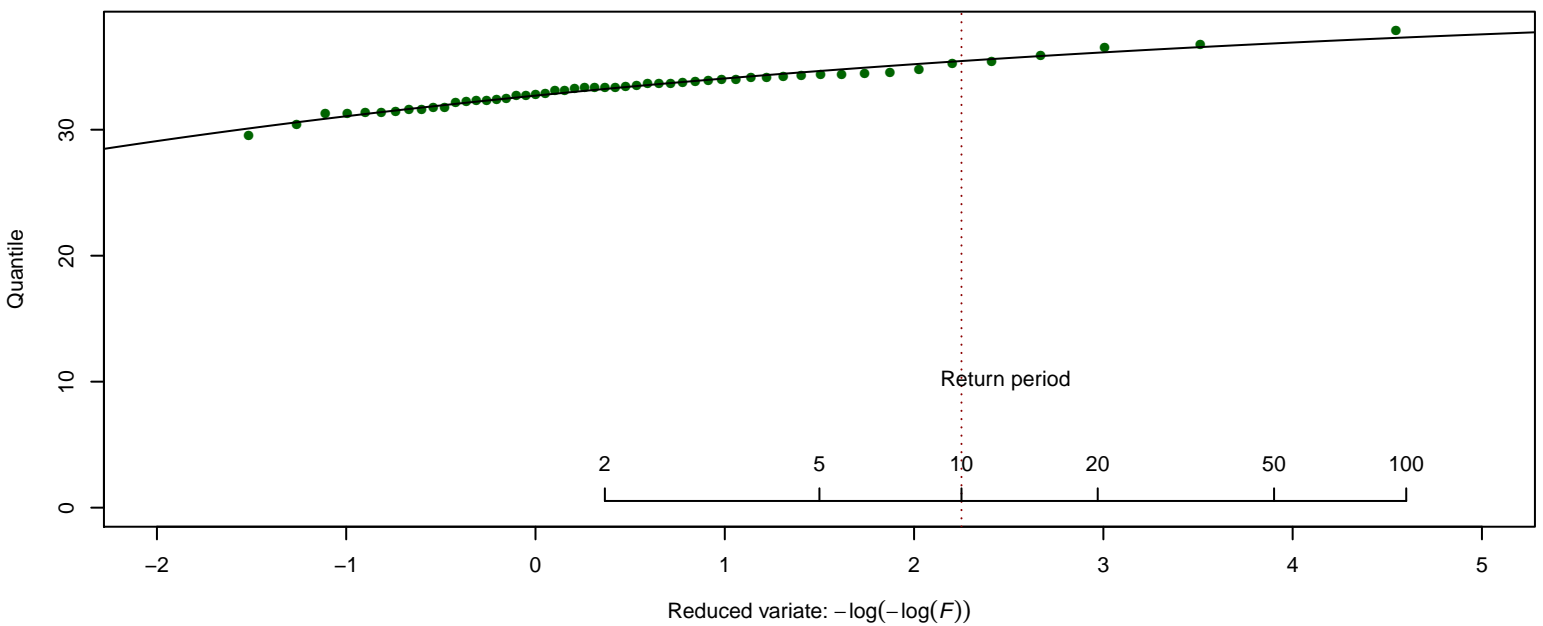

Supplement: Supplementary file [file tmax_output.pdf › supplement-nhess-2016-373/tmax_output.pdf]
